# Supplementary material for: Stereoselective syntheses of 2-methyl-1,3-diol acetalsviaRe-catalyzed [1,3]-allylic alcohol transposition
Source: Royal Society of Chemistry journal article supplement (doi:10.1039/d2sc07059f), 2023-01-01

# Stereoselective Syntheses of 2-Methyl-1,3-diol Acetals via Re-Catalyzed [1,3]-Allylic Alcohol Transposition

*Jiaming Liu and Ming Chen\**

Department of Chemistry and Biochemistry

Auburn University

E-mail: [mzc0102@auburn.edu](mailto:mzc0102@auburn.edu)

Supporting Information: Experimental Procedures, Tabulated Spectroscopic Data,  $^1\text{H}$  and

$^{13}\text{C}$  Spectra of New Compounds

**General Experimental Details.** All reaction solvents were purified before use. Tetrahydrofuran, dichloromethane, diethyl ether and toluene were purified by passing through a solvent column composed of activated A-1 alumina. Unless indicated otherwise, all reactions were conducted under an atmosphere of argon using flame-dried or oven-dried (120 °C) glassware. The term “concentrated under reduced pressure” refers to the removal of solvents and other volatile materials using a rotary evaporator with the water bath temperature below 30 °C, followed by removal of residual solvent at high vacuum (< 0.2 mbar).

Proton nuclear magnetic resonance (<sup>1</sup>H NMR) spectra were acquired on commercial instruments (400 and 600 MHz) at Auburn University NMR facility. Carbon-13 nuclear magnetic resonance (<sup>13</sup>C NMR) spectra were acquired at 126 and 151 MHz. The proton signal for residual nondeuterated solvent ( $\delta$  7.26 for CHCl<sub>3</sub>) was used as an internal reference for the <sup>1</sup>H NMR spectra. For the <sup>13</sup>C NMR spectra, chemical shifts are reported relative to the  $\delta$  77.36 resonance of CHCl<sub>3</sub>. Coupling constants are reported in Hz. Optical rotations were measured on a PerkinElmer 241 Automatic Polarimeter. High-resolution mass spectra were recorded on a commercial high-resolution mass spectrometer via the Micro Mass/Analytical Facility operated by the College of Chemistry and Biochemistry, Auburn University.

Analytical thin layer chromatography (TLC) was performed on Kieselgel 60 F254 glass plates precoated with a 0.25 mm thickness of silica gel. The TLC plates were visualized with UV light and/or by staining with Hanessian solution (ceric sulfate and ammonium molybdate in aqueous sulfuric acid) or KMnO<sub>4</sub>. Column chromatography was generally performed using Kieselgel 60 (230-400 mesh) silica gel, typically using a 50-100:1 weight ratio of silica gel to crude product.

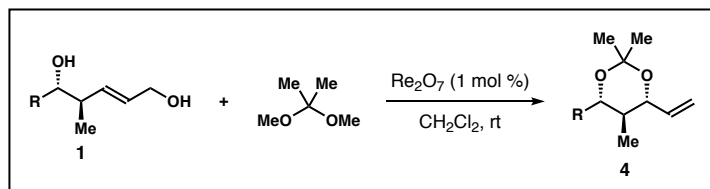

**General procedure for the syntheses of acetonides 4 from diols 1:** In an Ar-filled glove box,  $\text{Re}_2\text{O}_7$  (0.5 mg, 0.001 mmol, 1 mol %) and a Teflon-coated magnetic stirring bar were added into a reaction vial. The vial was sealed with rubber septum and removed from the glove box. Then a solution of 2,2-dimethoxypropane (0.2 mmol, 21 mg, 2.0 equiv) and diol **1** (0.10 mmol, 1.0 equiv) in dichloromethane (1 mL) were added to the vial under an argon atmosphere. The vial was sealed with a cap containing a PTFE-lined silicone septum and kept stirring at ambient temperature for 12 h. Then saturated  $\text{NaHCO}_3$  solution (1.0 mL) was added to the reaction mixture. The organic layer was separated and the aqueous layer was extracted with  $\text{Et}_2\text{O}$  (2 mL x 3). The combined organic extracts were dried over anhydrous sodium sulfate, filtered, and concentrated under reduced pressure. Purification of the crude product was performed by flash column chromatography (gradient elution with hexane and ethyl acetate 100:1 to 50:1) to give product **4**.

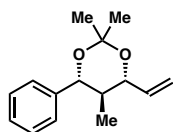

**(4R,5R,6R)-2,2,5-trimethyl-4-phenyl-6-vinyl-1,3-dioxane (4a)** Prepared according to the general procedure. The crude mixture was purified by flash column chromatography to give compound **4a** in 95% yield (22 mg) as colorless oil.  $^1\text{H}$  NMR (500 MHz,  $\text{CDCl}_3$ )  $\delta$  7.32 – 7.39 (m, 4H), 7.26 – 7.30 (m, 1H), 5.81 (ddd,  $J = 17.4, 10.3, 7.3$  Hz, 1H), 5.33 (ddd,  $J = 17.1, 1.7, 0.9$  Hz, 1H), 5.25 (dd,  $J = 10.3, 1.6$  Hz, 1H), 4.47 (d,  $J = 10.3$  Hz, 1H), 4.08 (dd,  $J = 10.2, 7.3$  Hz, 1H), 1.58 – 1.66 (m, 1H), 1.60 (s, 3H), 1.52 (s, 3H), 0.63 (d,  $J = 6.7$  Hz, 3H).  $^{13}\text{C}$  NMR (126 MHz,  $\text{CDCl}_3$ )  $\delta$  140.8, 137.3, 128.7, 128.4, 128.0, 118.6, 99.2, 78.7, 77.7, 40.5, 30.6, 20.1, 12.6. HRMS ( $\text{EI}^+$ ):  $m/z$  for  $\text{C}_{15}\text{H}_{20}\text{O}_2$   $[\text{M}]^+$  calcd. 232.1463, found: 232.1450.

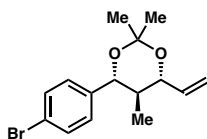

**(4R,5R,6R)-4-(4-bromophenyl)-2,2,5-trimethyl-6-vinyl-1,3-dioxane (4b)** Prepared according to the general procedure. The crude mixture was purified by flash column chromatography to give compound **4b** in 84% yield (26 mg) as colorless oil.  $^1\text{H}$  NMR (500 MHz,  $\text{CDCl}_3$ )  $\delta$  7.47 (d,  $J = 8.4$  Hz, 2H), 7.26 (d,  $J = 8.4$  Hz, 2H), 5.79 (ddd,  $J = 17.4, 10.3, 7.3$  Hz, 1H), 5.33 (d,  $J = 17.2$  Hz, 1H), 5.25 (dd,  $J = 10.3, 1.6$  Hz, 1H), 4.44 (d,  $J = 10.3$  Hz, 1H), 4.06 (dd,  $J = 10.2, 7.3$  Hz, 1H), 1.58 (s, 3H), 1.53 – 1.57 (m, 1H), 1.50 (s, 3H), 0.62 (d,  $J = 6.7$  Hz, 3H).  $^{13}\text{C}$  NMR

(126 MHz, CDCl<sub>3</sub>)  $\delta$  139.9, 137.1, 131.8, 129.7, 122.2, 118.7, 99.3, 78.1, 77.5, 40.5, 30.5, 20.0, 12.5. HRMS (EI<sup>+</sup>):  $m/z$  for C<sub>15</sub>H<sub>19</sub>BrO<sub>2</sub> [M]<sup>+</sup> calcd. 310.0568, found: 310.0578.

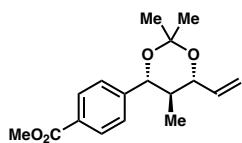

**Methyl 4-((4R,5R,6R)-2,2,5-trimethyl-6-vinyl-1,3-dioxan-4-yl)benzoate (4c)**

Prepared according to the general procedure. The crude mixture was purified by flash column chromatography to give compound **4c** in 96% yield (28 mg) as colorless oil. <sup>1</sup>H NMR (500 MHz, CDCl<sub>3</sub>)  $\delta$  8.02 (d,  $J$  = 8.4 Hz, 2H), 7.45 (d,  $J$  = 8.4 Hz, 2H), 5.79 (ddd,  $J$  = 17.4, 10.3, 7.3 Hz, 1H), 5.33 (d,  $J$  = 17.2 Hz, 1H), 5.26 (dd,  $J$  = 10.2, 2.1 Hz, 1H), 4.54 (d,  $J$  = 10.4 Hz, 1H), 4.08 (dd,  $J$  = 10.1, 7.2 Hz, 1H), 3.91 (s, 3H), 1.56 – 1.62 (m, 1H), 1.60 (s, 3H), 1.52 (s, 3H), 0.62 (d,  $J$  = 6.7 Hz, 3H). <sup>13</sup>C NMR (126 MHz, CDCl<sub>3</sub>)  $\delta$  167.3, 145.8, 137.1, 130.2, 130.0, 128.0, 118.8, 99.3, 78.3, 77.5, 52.5, 40.5, 30.5, 20.0, 12.5. HRMS (ESI<sup>+</sup>):  $m/z$  for C<sub>17</sub>H<sub>22</sub>O<sub>4</sub>Na [M+Na]<sup>+</sup> calcd. 313.1416, found: 313.1429.

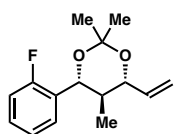

**(4R,5R,6R)-4-(2-fluorophenyl)-2,2,5-trimethyl-6-vinyl-1,3-dioxane (4d)**

Prepared according to the general procedure. The crude mixture was purified by flash column chromatography to give compound **4d** in 76% yield (19 mg) as colorless oil. <sup>1</sup>H NMR (500 MHz, CDCl<sub>3</sub>)  $\delta$  7.54 (dd,  $J$  = 7.4, 7.4 Hz, 1H), 7.23 – 7.28 (m, 1H), 7.18 (dd,  $J$  = 7.6, 7.6 Hz, 1H), 7.02 (dd,  $J$  = 9.2, 9.2 Hz, 1H), 5.77 – 5.84 (m, 1H), 5.34 (d,  $J$  = 16.5 Hz, 1H), 5.26 (d,  $J$  = 9.6 Hz, 1H), 4.97 (d,  $J$  = 10.5 Hz, 1H), 4.11 (dd,  $J$  = 10.0, 7.6 Hz, 1H), 1.58 – 1.66 (m, 1H), 1.62 (s, 3H), 1.51 (s, 3H), 0.66 (d,  $J$  = 6.7 Hz, 3H). <sup>13</sup>C NMR (126 MHz, CDCl<sub>3</sub>)  $\delta$  160.6 (d,  $J$  = 245.9 Hz), 137.2, 129.6 (d,  $J$  = 8.7 Hz), 128.9 (d,  $J$  = 3.7 Hz), 128.2 (d,  $J$  = 13.3 Hz), 125.0 (d,  $J$  = 3.7 Hz), 118.7, 115.4 (d,  $J$  = 22.5 Hz), 99.4, 77.7 (via DEPT 135), 70.3, 40.6, 30.5, 20.0, 12.1. HRMS (EI<sup>+</sup>):  $m/z$  for C<sub>15</sub>H<sub>19</sub>FO<sub>2</sub> [M]<sup>+</sup> calcd. 250.1369 found: 250.1376.

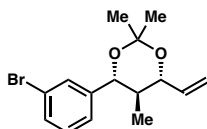

**(4R,5R,6R)-4-(3-bromophenyl)-2,2,5-trimethyl-6-vinyl-1,3-dioxane (4e)**

Prepared according to the general procedure. The crude mixture was purified by flash column chromatography to give compound **4e** in 77% yield (24 mg) as colorless oil. <sup>1</sup>H NMR (500 MHz, CDCl<sub>3</sub>)  $\delta$  7.55 (dd,  $J$  = 1.8, 1.8 Hz, 1H), 7.41 – 7.43 (m, 1H), 7.28 – 7.30 (m, 1H), 7.21 (dd,  $J$  = 7.8, 7.8 Hz, 1H), 5.79 (ddd,  $J$  = 17.4, 10.3, 7.3 Hz, 1H), 5.33 (ddd,  $J$  = 17.2, 1.7, 1.0 Hz, 1H), 5.26 (ddd,  $J$  = 10.3, 1.7, 0.6 Hz, 1H), 4.44 (d,  $J$  = 10.3 Hz, 1H), 4.06 (dd,  $J$  = 10.2, 7.3 Hz, 1H), 1.56 – 1.61 (m, 1H), 1.58 (s, 3H), 1.51 (s, 3H), 0.64 (d,  $J$  = 6.7 Hz, 3H). <sup>13</sup>C NMR (126 MHz, CDCl<sub>3</sub>)  $\delta$  143.1, 137.1, 131.5, 131.0, 130.2, 126.7, 122.9, 118.8, 99.3, 78.1, 77.5, 40.4,

30.5, 20.0, 12.6. HRMS (EI<sup>+</sup>): m/z for C<sub>15</sub>H<sub>19</sub>BrO<sub>2</sub> [M]<sup>+</sup> calcd. 310.0568, found: 310.0561.

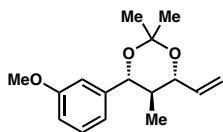

**(4*R*,5*R*,6*R*)-4-(3-methoxyphenyl)-2,2,5-trimethyl-6-vinyl-1,3-dioxane (4f)**

Prepared according to the general procedure. The crude mixture was purified by flash column chromatography to give compound **4f** in 72% yield (19 mg) as colorless oil. <sup>1</sup>H NMR (500 MHz, CDCl<sub>3</sub>) δ 7.23 – 7.27 (m, 1H), 6.94 – 6.96 (m, 2H), 6.82 – 6.84 (m, 1H), 5.80 (ddd, *J* = 17.4, 10.2, 7.3 Hz, 1H), 5.33 (ddd, *J* = 17.2, 1.8, 0.9 Hz, 1H), 5.25 (dd, *J* = 10.3, 1.7 Hz, 1H), 4.45 (d, *J* = 10.2 Hz, 1H), 4.07 (dd, *J* = 10.2, 7.3 Hz, 1H), 3.82 (s, 3H), 1.57 – 1.65 (m, 1H), 1.60 (s, 3H), 1.51 (s, 3H), 0.64 (d, *J* = 6.8 Hz, 3H). <sup>13</sup>C NMR (126 MHz, CDCl<sub>3</sub>) δ 160.1, 142.3, 137.3, 129.6, 120.5, 118.6, 114.0, 113.4, 99.2, 78.6, 77.6 (via DEPT 135), 55.6, 40.4, 30.6, 20.1, 12.7. HRMS (ESI<sup>+</sup>): m/z for C<sub>16</sub>H<sub>22</sub>O<sub>3</sub>Na [M+Na]<sup>+</sup> calcd. 285.1467, found: 285.1453.

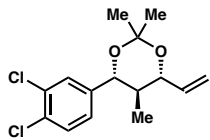

**(4*R*,5*R*,6*R*)-4-(3,4-dichlorophenyl)-2,2,5-trimethyl-6-vinyl-1,3-dioxane (4g)**

Prepared according to the general procedure. The crude mixture was purified by flash column chromatography to give compound **4g** in 80% yield (24 mg) as colorless oil. <sup>1</sup>H NMR (600 MHz, CDCl<sub>3</sub>) δ 7.49 (d, *J* = 2.1 Hz, 1H), 7.42 (d, *J* = 8.3 Hz, 1H), 7.20 (dd, *J* = 8.2, 2.1 Hz, 1H), 5.79 (ddd, *J* = 17.4, 10.3, 7.2 Hz, 1H), 5.33 (d, *J* = 17.1 Hz, 1H), 5.26 (dd, *J* = 10.1, 1.8 Hz, 1H), 4.43 (d, *J* = 10.3 Hz, 1H), 4.06 (dd, *J* = 10.2, 7.2 Hz, 1H), 1.58 (s, 3H), 1.51 – 1.56 (m, 1H), 1.50 (s, 3H), 0.64 (d, *J* = 6.7 Hz, 3H). <sup>13</sup>C NMR (126 MHz, CDCl<sub>3</sub>) δ 141.1, 136.9, 132.9, 132.3, 130.6, 130.0, 127.4, 118.9, 99.4, 77.6 (via DEPT 135), 77.4 (via DEPT 135), 40.5, 30.5, 20.0, 12.5. HRMS (EI<sup>+</sup>): m/z for C<sub>15</sub>H<sub>18</sub>Cl<sub>2</sub>O<sub>2</sub> [M]<sup>+</sup> calcd. 300.0684, found: 300.0688.

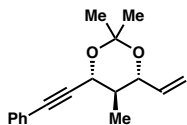

**(4*R*,5*R*,6*R*)-2,2,5-trimethyl-4-(phenylethynyl)-6-vinyl-1,3-dioxane (4i)**

Prepared according to the general procedure. The crude mixture was purified by flash column chromatography to give compound **4i** in 66% yield (17 mg) as colorless oil. <sup>1</sup>H NMR (500 MHz, CDCl<sub>3</sub>) δ 7.44 – 7.47 (m, 2H), 7.28 – 7.32 (m, 3H), 5.75 – 5.82 (m, 1H), 5.32 (d, *J* = 17.2 Hz, 1H), 5.26 (d, *J* = 10.4 Hz, 1H), 4.55 (d, *J* = 10.5 Hz, 1H), 3.97 (dd, *J* = 9.9, 7.8 Hz, 1H), 1.71 – 1.80 (m, 1H), 1.55 (s, 3H), 1.51 (s, 3H), 0.99 (d, *J* = 6.7 Hz, 3H). <sup>13</sup>C NMR (126 MHz, CDCl<sub>3</sub>) δ 136.9, 132.3, 128.8, 128.5, 122.9, 118.8, 99.5, 87.2, 85.6, 77.3, 67.4, 39.8, 30.4, 19.7, 13.2. HRMS (EI<sup>+</sup>): m/z for C<sub>17</sub>H<sub>20</sub>O<sub>2</sub> [M]<sup>+</sup> calcd. 256.1463, found: 256.1471.

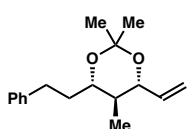

**(4*S*,5*S*,6*R*)-2,2,5-trimethyl-4-phenethyl-6-vinyl-1,3-dioxane (4j)**

Prepared according to the general procedure. The crude mixture was purified by flash column chromatography to give compound **4j** in 69% yield (18 mg) as colorless oil. <sup>1</sup>H NMR (500 MHz, CDCl<sub>3</sub>) δ 7.26 – 7.29 (m, 2H), 7.16 – 7.20 (m, 3H), 5.74 (ddd, *J* = 17.4, 10.3, 7.4 Hz, 1H), 5.25 (d, *J* = 17.2 Hz, 1H), 5.21 (dd, *J* = 10.3, 1.9 Hz, 1H), 3.85 (dd, *J* = 10.2, 7.5 Hz, 1H), 3.45 (td, *J* = 9.6, 2.4 Hz, 1H), 2.80 – 2.85 (m, 1H), 2.60 – 2.66 (m, 1H), 1.90 – 1.97 (m, 1H), 1.65 – 1.73 (m, 1H), 1.455 (s, 3H), 1.447 (s, 3H), 1.29 – 1.37 (m, 1H), 0.73 (d, *J* = 6.6 Hz, 3H). <sup>13</sup>C NMR (126 MHz, CDCl<sub>3</sub>) δ 142.7, 137.7, 128.9, 128.6, 126.0, 118.5, 98.5, 77.4, 73.3, 38.6, 35.3, 31.4, 30.6, 20.1, 12.5. HRMS (EI<sup>+</sup>): *m/z* for C<sub>17</sub>H<sub>24</sub>O<sub>2</sub> [M]<sup>+</sup> calcd. 260.1776, found: 260.1788.

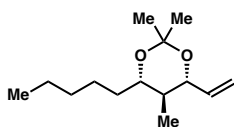

**(4*S*,5*S*,6*R*)-2,2,5-trimethyl-4-pentyl-6-vinyl-1,3-dioxane (4k)**

Prepared according to the general procedure. The crude mixture was purified by flash column chromatography to give compound **4k** in 88% yield (20 mg) as colorless oil. <sup>1</sup>H NMR (500 MHz, CDCl<sub>3</sub>) δ 5.74 (ddd, *J* = 17.5, 10.3, 7.5 Hz, 1H), 5.26 (ddd, *J* = 17.2, 1.7, 0.9 Hz, 1H), 5.21 (dd, *J* = 10.3, 1.8 Hz, 1H), 3.87 (dd, *J* = 10.2, 7.5 Hz, 1H), 3.48 (ddd, *J* = 10.4, 8.1, 2.5 Hz, 1H), 1.57 – 1.63 (m, 1H), 1.44 – 1.54 (m, 4H), 1.19 – 1.43 (m, 10H), 0.89 (t, *J* = 7.0 Hz, 3H), 0.76 (d, *J* = 6.7 Hz, 3H). <sup>13</sup>C NMR (126 MHz, CDCl<sub>3</sub>) δ 137.9, 118.4, 98.4, 77.5 (via DEPT 135), 74.4, 38.4, 33.5, 32.2, 30.6, 25.0, 23.0, 20.1, 14.5, 12.6. HRMS (EI<sup>+</sup>): *m/z* for C<sub>14</sub>H<sub>26</sub>O<sub>2</sub> [M]<sup>+</sup> calcd. 226.1933, found: 226.1951.

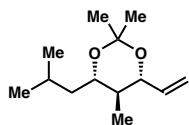

**(4*S*,5*S*,6*R*)-4-isobutyl-2,2,5-trimethyl-6-vinyl-1,3-dioxane (4l)**

Prepared according to the general procedure. The crude mixture was purified by flash column chromatography to give compound **4l** in 66% yield (14 mg) as white solid. <sup>1</sup>H NMR (600 MHz, CDCl<sub>3</sub>) δ 5.74 (ddd, *J* = 17.5, 10.3, 7.4 Hz, 1H), 5.26 (ddd, *J* = 17.2, 1.8, 0.9 Hz, 1H), 5.21 (dd, *J* = 10.3, 2.4 Hz, 1H), 3.88 (dd, *J* = 10.2, 7.4 Hz, 1H), 3.54 (td, *J* = 10.0, 3.3 Hz, 1H), 1.82 – 1.90 (m, 1H), 1.47 (s, 3H), 1.41 (s, 3H), 1.30 – 1.38 (m, 1H), 1.23 – 1.29 (m, 2H), 0.91 (d, *J* = 6.7 Hz, 3H), 0.87 (d, *J* = 6.6 Hz, 3H), 0.75 (d, *J* = 6.7 Hz, 3H). <sup>13</sup>C NMR (126 MHz, CDCl<sub>3</sub>) δ 137.9, 118.4, 98.3, 77.7, 72.4, 42.7, 39.1, 30.6, 24.2, 24.1, 21.7, 19.9, 12.7. HRMS (EI<sup>+</sup>): *m/z* for C<sub>13</sub>H<sub>24</sub>O<sub>2</sub> [M]<sup>+</sup> calcd. 212.1776, found: 212.1785.

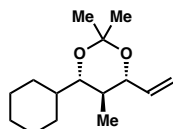

**(4*S*,5*R*,6*R*)-4-cyclohexyl-2,2,5-trimethyl-6-vinyl-1,3-dioxane (4m)**

Prepared according to the general procedure. The crude mixture was purified by flash column chromatography to give compound **4m** in 71%

yield (17 mg) as colorless oil.  $^1\text{H}$  NMR (500 MHz,  $\text{CDCl}_3$ )  $\delta$  5.74 (ddd,  $J = 17.5, 10.3, 7.5$  Hz, 1H), 5.26 (ddd,  $J = 17.2, 1.8, 0.9$  Hz, 1H), 5.21 (dd,  $J = 10.3, 1.8$  Hz, 1H), 3.86 (dd,  $J = 10.1, 7.5$  Hz, 1H), 3.34 (dd,  $J = 10.3, 2.1$  Hz, 1H), 1.72 – 1.77 (m, 2H), 1.61–1.66 (m, 1H), 1.56–1.61 (m, 1H), 1.46 – 1.54 (m, 3H), 1.40 – 1.45 (m, 4H), 1.38 (s, 3H), 1.19 – 1.30 (m, 2H), 1.10 – 1.18 (m, 2H), 0.73 (d,  $J = 6.7$  Hz, 3H).  $^{13}\text{C}$  NMR (126 MHz,  $\text{CDCl}_3$ )  $\delta$  138.0, 118.4, 98.3, 78.1, 77.8, 38.9, 34.9, 30.7, 30.5, 27.2, 26.93, 26.89, 25.2, 20.0, 12.2. HRMS ( $\text{EI}^+$ ):  $m/z$  for  $\text{C}_{15}\text{H}_{26}\text{O}_2$   $[\text{M}]^+$  calcd. 238.1933, found: 238.1941.

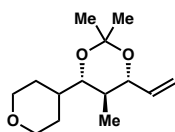

**(4S,5R,6R)-2,2,5-trimethyl-4-(tetrahydro-2H-pyran-4-yl)-6-vinyl-1,3-dioxane (4n)** Prepared according to the general procedure. The crude mixture was purified by flash column chromatography to give compound

**4n** in 75% yield (18 mg) as colorless oil.  $^1\text{H}$  NMR (600 MHz,  $\text{CDCl}_3$ )  $\delta$  5.74 (ddd,  $J = 17.4, 10.3, 7.5$  Hz, 1H), 5.27 (d,  $J = 17.1$  Hz, 1H), 5.22 (dd,  $J = 10.3, 1.8$  Hz, 1H), 3.98 – 4.02 (m, 2H), 3.88 (dd,  $J = 10.1, 7.4$  Hz, 1H), 3.32 – 3.42 (m, 3H), 1.84 – 1.91 (m, 1H), 1.76 – 1.81 (m, 1H), 1.68 – 1.75 (m, 1H), 1.45 – 1.51 (m, 1H), 1.43 (s, 3H), 1.43 – 1.38 (m, 1H), 1.38 (s, 3H), 1.26 – 1.29 (m, 1H), 0.76 (d,  $J = 6.6$  Hz, 3H).  $^{13}\text{C}$  NMR (126 MHz,  $\text{CDCl}_3$ )  $\delta$  137.7, 118.6, 98.4, 77.5, 76.9, 68.7, 68.6, 36.3, 34.6, 30.4, 29.9, 25.5, 20.0, 12.2. HRMS ( $\text{ESI}^+$ ):  $m/z$  for  $\text{C}_{14}\text{H}_{24}\text{O}_3\text{Na}$   $[\text{M}+\text{Na}]^+$  calcd. 263.1623, found: 263.1633.

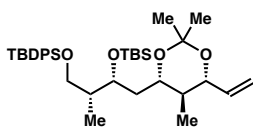

**(5R,6R)-2,2,3,3,6,10,10-heptamethyl-9,9-diphenyl-5-(((4S,5S,6R)-2,2,5-trimethyl-6-vinyl-1,3-dioxan-4-yl)methyl)-4,8-dioxa-3,9-disilaundecane (4o)** Prepared according to the general procedure.

The crude mixture was purified by flash column chromatography to give compound **4o** in 79% yield (48 mg) as colorless oil.  $^1\text{H}$  NMR (600 MHz,  $\text{CDCl}_3$ )  $\delta$  7.65 – 7.68 (m, 4H), 7.39 – 7.43 (m, 2H), 7.35 – 7.38 (m, 4H), 5.73 (ddd,  $J = 17.4, 10.3, 7.4$  Hz, 1H), 5.26 (d,  $J = 17.2$  Hz, 1H), 5.21 (dd,  $J = 10.3, 2.1$  Hz, 1H), 4.19 – 4.21 (m, 1H), 3.86 (dd,  $J = 10.2, 7.4$  Hz, 1H), 3.62 (dd,  $J = 9.8, 7.7$  Hz, 1H), 3.44 – 3.49 (m, 2H), 1.81 – 1.88 (m, 2H), 1.49 – 1.53 (m, 1H), 1.42 (s, 3H), 1.36 (s, 3H), 1.26 – 1.32 (m, 1H), 1.06 (s, 9H), 0.83 (s, 9H), 0.79 (d,  $J = 6.8$  Hz, 3H), 0.76 (d,  $J = 6.7$  Hz, 3H), 0.05 (s, 3H), -0.02 (s, 3H).  $^{13}\text{C}$  NMR (126 MHz,  $\text{CDCl}_3$ )  $\delta$  137.7, 135.9 (two overlapping carbon signals), 134.6, 134.5, 129.83, 129.82, 127.91, 127.89, 118.4, 98.2, 77.4 (via DEPT 135), 71.8, 67.7, 67.0, 39.1, 39.0, 38.8, 30.4, 27.3, 26.3, 19.9, 19.6, 18.4, 12.7, 9.6, -3.7, -4.5. HRMS ( $\text{ESI}^+$ ):  $m/z$  for  $\text{C}_{36}\text{H}_{58}\text{O}_4\text{Si}_2\text{Na}$   $[\text{M}+\text{Na}]^+$  calcd. 633.3771, found: 633.3754.

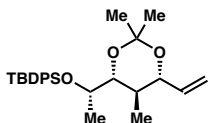

**tert-Butyldiphenyl((S)-1-(((4R,5R,6R)-2,2,5-trimethyl-6-vinyl-1,3-dioxan-4-yl)ethoxy)silane (4p)** Prepared according to the general

procedure. The crude mixture was purified by flash column chromatography to give compound **4p** in 68% yield (30 mg) as colorless oil.  $^1\text{H}$  NMR (500 MHz,  $\text{CDCl}_3$ )  $\delta$  7.73 – 7.75 (m, 2H), 7.67 – 7.69 (m, 2H), 7.40 – 7.44 (m, 2H), 7.35 – 7.39 (m, 4H), 5.64 (ddd,  $J = 17.5, 10.3, 7.5$  Hz, 1H), 5.17 – 5.20 (m, 1H), 5.15 – 5.17 (m, 1H), 3.97 – 4.01 (m, 1H), 3.66 (dd,  $J = 10.1, 7.5$  Hz, 1H), 3.38 (dd,  $J = 10.6, 2.0$  Hz, 1H), 1.45 (s, 3H), 1.36 (s, 3H), 1.15 – 1.23 (m, 1H), 1.16 (d,  $J = 6.4$  Hz, 3H), 1.07 (s, 9H), 0.32 (d,  $J = 6.6$  Hz, 3H).  $^{13}\text{C}$  NMR (126 MHz,  $\text{CDCl}_3$ )  $\delta$  137.6, 136.4, 136.3, 134.84, 134.83, 129.9 (two overlapping carbon signals), 127.9, 127.8, 118.6, 98.5, 77.9, 77.2, 69.6, 34.8, 30.5, 27.4, 20.0, 19.6, 17.0, 11.9. HRMS (ESI $^+$ ):  $m/z$  for  $\text{C}_{27}\text{H}_{38}\text{O}_3\text{SiNa}$   $[\text{M}+\text{Na}]^+$  calcd. 461.2488, found: 461.2491.

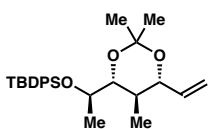

**tert-Butyldiphenyl((R)-1-((4R,5R,6R)-2,2,5-trimethyl-6-vinyl-1,3-dioxan-4-yl)ethoxy)silane (4q)** Prepared according to the general procedure. The crude mixture was purified by flash column chromatography to give compound **4q** in 64% yield (28 mg) as colorless oil.  $^1\text{H}$  NMR (500 MHz,  $\text{CDCl}_3$ )  $\delta$  7.72 – 7.75 (m, 4H), 7.37 – 7.46 (m, 6H), 5.75 (ddd,  $J = 17.4, 10.2, 7.4$  Hz, 1H), 5.23 – 5.29 (m, 2H), 4.00 – 4.01 (m, 1H), 3.84 (dd,  $J = 10.3, 7.4$  Hz, 1H), 3.41 (dd,  $J = 10.2, 2.6$  Hz, 1H), 1.66 – 1.71 (m, 1H), 1.40 (s, 3H), 1.32 (s, 3H), 1.11 (d,  $J = 6.4$  Hz, 3H), 1.08 (s, 9H), 0.85 (d,  $J = 6.7$  Hz, 3H).  $^{13}\text{C}$  NMR (126 MHz,  $\text{CDCl}_3$ )  $\delta$  137.7, 136.3, 136.2, 134.8, 134.7, 130.0, 129.8, 128.0, 127.7, 118.6, 98.4, 77.5, 77.1, 71.1, 34.3, 30.4, 27.3, 19.8, 19.6, 18.6, 12.5. HRMS (ESI $^+$ ):  $m/z$  for  $\text{C}_{27}\text{H}_{38}\text{O}_3\text{SiNa}$   $[\text{M}+\text{Na}]^+$  calcd. 461.2488, found: 461.2481.

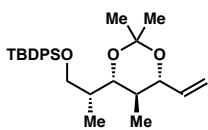

**tert-Butyldiphenyl((R)-2-((4S,5R,6R)-2,2,5-trimethyl-6-vinyl-1,3-dioxan-4-yl)propoxy)silane (4r)** Prepared according to the general procedure. The crude mixture was purified by flash column chromatography to give compound **4r** in 82% yield (37 mg) as colorless oil.  $^1\text{H}$  NMR (600 MHz,  $\text{CDCl}_3$ )  $\delta$  7.66 – 7.69 (m, 4H), 7.41 – 7.43 (m, 2H), 7.36 – 7.39 (m, 4H), 5.77 (ddd,  $J = 17.5, 10.3, 7.4$  Hz, 1H), 5.28 (d,  $J = 17.2$  Hz, 1H), 5.22 (dd,  $J = 10.2, 1.8$  Hz, 1H), 3.91 – 3.94 (m, 2H), 3.69 (dd,  $J = 9.4, 9.4$  Hz, 1H), 3.46 (dd,  $J = 9.6, 5.7$  Hz, 1H), 1.95 – 1.98 (m, 1H), 1.43 – 1.53 (m, 1H), 1.46 (s, 3H), 1.38 (s, 3H), 1.05 (s, 9H), 0.76 (d,  $J = 7.0$  Hz, 3H), 0.74 (d,  $J = 6.7$  Hz, 3H).  $^{13}\text{C}$  NMR (126 MHz,  $\text{CDCl}_3$ )  $\delta$  137.9, 135.9 (two overlapping carbon signals), 134.40, 134.38, 129.88, 129.85, 128.0, 127.9, 118.4, 98.3, 77.7, 72.3, 65.8, 36.6, 34.9, 30.5, 27.2, 20.2, 19.6, 12.2, 9.4. HRMS (ESI $^+$ ):  $m/z$  for  $\text{C}_{28}\text{H}_{40}\text{O}_3\text{SiNa}$   $[\text{M}+\text{Na}]^+$  calcd. 475.2644, found: 475.2627.



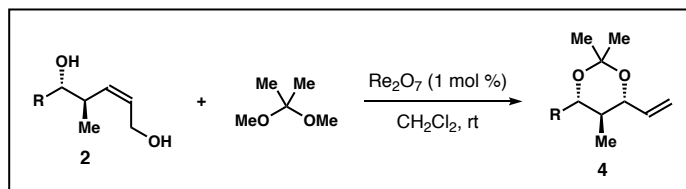

**General procedure for the syntheses of acetonides 4 from diols 2:** In an Ar-filled glove box,  $\text{Re}_2\text{O}_7$  (0.5 mg, 0.001 mmol, 1 mol %) and a Teflon-coated magnetic stirring bar were added into a reaction vial. The vial was sealed with rubber septum and removed from the glove box. Then a solution of 2,2-dimethoxypropane (0.2 mmol, 21 mg, 2.0 equiv) and diol **2** (0.10 mmol, 1.0 equiv) in dichloromethane (1 mL) were added to the vial under an argon atmosphere. The vial was sealed with a cap containing a PTFE-lined silicone septum and kept stirring at ambient temperature for 12 h. Then saturated  $\text{NaHCO}_3$  solution (1.0 mL) was added to the reaction mixture. The organic layer was separated and the aqueous layer was extracted with  $\text{Et}_2\text{O}$  (2 mL x 3). The combined organic extracts were dried over anhydrous sodium sulfate, filtered, and concentrated under reduced pressure. Purification of the crude product was performed by flash column chromatography (gradient elution with hexane and ethyl acetate 100:1 to 50:1) to give product **4**.

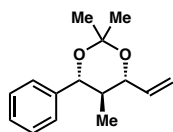

**(4R,5R,6R)-2,2,5-trimethyl-4-phenyl-6-vinyl-1,3-dioxane (4a)** Prepared according to the general procedure. The crude mixture was purified by flash column chromatography to give compound **4a** in 73% yield (17 mg) as colorless oil.

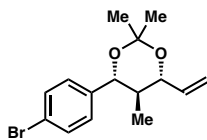

**(4R,5R,6R)-4-(4-bromophenyl)-2,2,5-trimethyl-6-vinyl-1,3-dioxane (4b)** Prepared according to the general procedure. The crude mixture was purified by flash column chromatography to give compound **4b** in 77% yield (24 mg) as colorless oil.

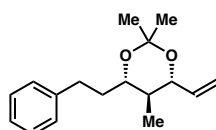

**(4S,5S,6R)-2,2,5-trimethyl-4-phenethyl-6-vinyl-1,3-dioxane (4j)** Prepared according to the general procedure. The crude mixture was purified by flash column chromatography to give compound **4j** in 65% yield (17 mg) as colorless oil.

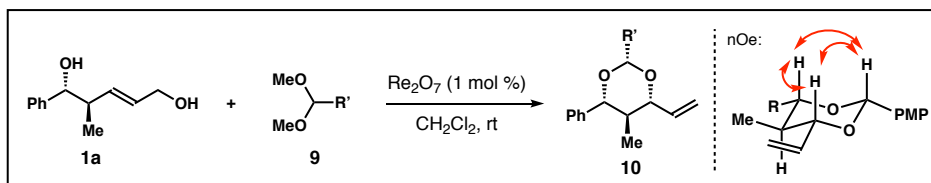

**General procedure for the syntheses of acetals 10 from diol 1a:** In an Ar-filled glove box,  $\text{Re}_2\text{O}_7$  (0.5 mg, 0.001 mmol, 1 mol %) and a Teflon-coated magnetic stirring bar were added into a reaction vial. The vial was sealed with rubber septum and removed from the glove box. Then a solution of diol **1a** (0.10 mmol, 19 mg, 1.0 equiv) and acetal **9** (0.2 mmol, 2.0 equiv) in dichloromethane (1 mL) were added to the vial under an argon atmosphere. The vial was sealed with a cap containing a PTFE-lined silicone septum and kept stirring at ambient temperature for 12 h. Then saturated  $\text{NaHCO}_3$  solution (1.0 mL) was added to the reaction mixture. The organic layer was separated and the aqueous layer was extracted with  $\text{Et}_2\text{O}$  (2 mL x 3). The combined organic extracts were dried over anhydrous sodium sulfate, filtered, and concentrated under reduced pressure. Purification of the crude product was performed by flash column chromatography (gradient elution with hexane and ethyl acetate 100:1 to 50:1) to give product **10**.

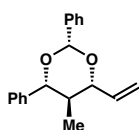

**(2R,4R,5R,6R)-5-methyl-2,4-diphenyl-6-vinyl-1,3-dioxane (10a)** Prepared according to the general procedure. The crude mixture was purified by flash column chromatography to give compound **10a** in 93% yield (26 mg) as colorless oil.  $^1\text{H}$  NMR (500 MHz,  $\text{CDCl}_3$ )  $\delta$  7.55 – 7.57 (m, 2H), 7.41 – 7.44 (m, 2H), 7.29 – 7.37 (m, 6H), 5.90 – 5.97 (m, 1H), 5.80 (s, 1H), 5.41 (d,  $J = 17.1$  Hz, 1H), 5.29 (d,  $J = 10.4$  Hz, 1H), 4.44 (d,  $J = 10.0$  Hz, 1H), 4.08 (dd,  $J = 10.0, 7.2$  Hz, 1H), 1.83 – 1.91 (m, 1H), 0.69 (d,  $J = 6.8, 3\text{H}$ ).  $^{13}\text{C}$  NMR (126 MHz,  $\text{CDCl}_3$ )  $\delta$  140.1, 138.8, 136.4, 129.1, 128.7, 128.5 (two overlapping carbon signals), 128.1, 126.8, 118.8, 101.4, 86.2, 84.8, 40.5, 12.6. HRMS ( $\text{EI}^+$ ):  $m/z$  for  $\text{C}_{19}\text{H}_{19}\text{O}_2$   $[\text{M}-\text{H}]^+$  calcd. 279.1385, found: 279.1380.

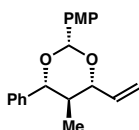

**(2R,4R,5R,6R)-2-(4-methoxyphenyl)-5-methyl-4-phenyl-6-vinyl-1,3-dioxane (10b)** Prepared according to the general procedure. The crude mixture was purified by flash column chromatography to give compound **10b** in 87% yield (27 mg) as colorless oil.  $^1\text{H}$  NMR (500 MHz,  $\text{CDCl}_3$ )  $\delta$  7.47 – 7.50 (m, 2H), 7.40 – 7.43 (m, 2H), 7.33 – 7.37 (m, 2H), 7.28 – 7.32 (m, 1H), 6.86 – 6.88 (m, 2H), 5.93 (ddd,  $J = 17.4, 10.4, 7.2$  Hz, 1H), 5.75 (s, 1H), 5.38 – 5.42 (m, 1H), 5.27 – 5.29 (m, 1H), 4.42 (d,  $J = 9.9$  Hz, 1H), 4.06 (dd,  $J = 9.9, 7.2$  Hz, 1H), 3.79 (s, 3H), 1.81 – 1.89 (m, 1H), 0.68 (d,  $J = 6.7$  Hz, 3H).  $^{13}\text{C}$  NMR (126 MHz,  $\text{CDCl}_3$ )  $\delta$  160.3, 140.2, 136.5, 131.5, 128.7, 128.5,

128.1, 128.0, 118.7, 113.9, 101.3, 86.1, 84.8, 55.6, 40.4, 12.6. HRMS (EI<sup>+</sup>): m/z for C<sub>20</sub>H<sub>22</sub>O<sub>3</sub>Na [M+Na]<sup>+</sup> calcd. 333.1467, found: 333.1457.

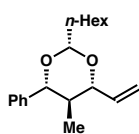

**(2*R*,4*R*,5*R*,6*R*)-2-hexyl-5-methyl-4-phenyl-6-vinyl-1,3-dioxane (10c)**

Prepared according to the general procedure. The crude mixture was purified by flash column chromatography to give compound **10c** in 90% yield (26 mg) as colorless oil. <sup>1</sup>H NMR (500 MHz, CDCl<sub>3</sub>) δ 7.32 – 7.37 (m, 4H), 7.28 – 7.32 (m, 1H), 5.87 (ddd, *J* = 17.4, 10.4, 7.1 Hz, 1H), 5.33–5.37 (m, 1H), 5.25 – 5.27 (m, 1H), 4.80 (t, *J* = 5.0 Hz, 1H), 4.19 (d, *J* = 10.0 Hz, 1H), 3.82 (dd, *J* = 9.9, 7.1 Hz, 1H), 1.66 – 1.74 (m, 3H), 1.40 – 1.47 (m, 2H), 1.22 – 1.32 (m, 6H), 0.86 (t, *J* = 6.8 Hz, 1H), 0.61 (d, *J* = 6.8 Hz, 3H). <sup>13</sup>C NMR (126 MHz, CDCl<sub>3</sub>) δ 140.4, 136.7, 128.7, 128.4, 128.0, 118.5, 102.2, 85.7, 84.2, 40.4, 35.5, 32.1, 29.6, 24.3, 22.9, 14.4, 12.6. HRMS (EI<sup>+</sup>): m/z for C<sub>19</sub>H<sub>27</sub>O<sub>2</sub> [M–H]<sup>+</sup> calcd. 287.2011, found: 287.2003.

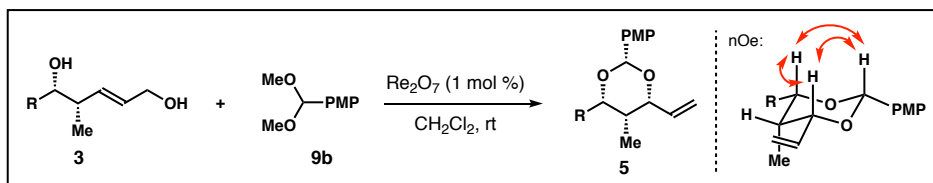

**General procedure for the syntheses of acetals 5 from diols 3:** In an Ar-filled glove box, Re<sub>2</sub>O<sub>7</sub> (0.5 mg, 0.001 mmol, 1 mol %) and a Teflon-coated magnetic stirring bar were added into a reaction vial. The vial was sealed with rubber septum and removed from the glove box. Then a solution of diol **3** (0.10 mmol, 19 mg, 1.0 equiv) and acetal **9b** (0.2 mmol, 36 mg, 2.0 equiv) in dichloromethane (1 mL) were added to the vial under an argon atmosphere. The vial was sealed with a cap containing a PTFE-lined silicone septum and kept stirring at ambient temperature for 12 h. Then saturated NaHCO<sub>3</sub> solution (1.0 mL) was added to the reaction mixture. The organic layer was separated and the aqueous layer was extracted with Et<sub>2</sub>O (2 mL x 3). The combined organic extracts were dried over anhydrous sodium sulfate, filtered, and concentrated under reduced pressure. Purification of the crude product was performed by flash column chromatography (gradient elution with hexane and ethyl acetate 100:1 to 50:1) to give product **5**.

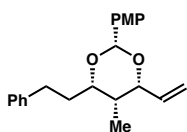

**(2*S*,4*S*,5*R*,6*R*)-2-(4-methoxyphenyl)-5-methyl-4-phenethyl-6-vinyl-1,3-dioxane (5a)**

Prepared according to the general procedure. The crude mixture was purified by flash column chromatography to give compound

**5a** in 83% yield (28 mg) as colorless oil.  $^1\text{H}$  NMR (500 MHz,  $\text{CDCl}_3$ )  $\delta$  7.46 – 7.49 (m, 2H), 7.28 – 7.31 (m, 2H), 7.18 – 7.22 (m, 3H), 6.89 – 6.92 (m, 2H), 5.85 (ddd,  $J = 17.4$ , 10.8, 4.8 Hz, 1H), 5.54 (s, 1H), 5.30 – 5.34 (m, 1H), 5.18 – 5.21 (m, 1H), 4.40 – 4.42 (m, 1H), 3.86 – 3.89 (m, 1H), 3.81 (s, 3H), 2.78 – 2.84 (m, 1H), 2.66 – 2.72 (m, 1H), 2.01 – 2.09 (m, 1H), 1.68 – 1.75 (m, 1H), 1.55 – 1.60 (m, 1H), 0.99 (d,  $J = 7.0$  Hz, 3H).  $^{13}\text{C}$  NMR (126 MHz,  $\text{CDCl}_3$ )  $\delta$  160.2, 142.3, 137.1, 131.9, 128.9, 128.7, 127.9, 126.2, 115.6, 113.9, 101.6, 81.6, 80.0, 55.7, 36.2, 34.6, 32.0, 6.7. HRMS (ESI $^+$ ):  $m/z$  for  $\text{C}_{22}\text{H}_{27}\text{O}_3$   $[\text{M}+\text{H}]^+$  calcd. 339.1960, found: 339.1953.

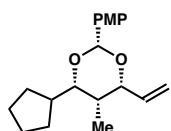

**(2*R*,4*S*,5*S*,6*R*)-4-cyclopentyl-2-(4-methoxyphenyl)-5-methyl-6-vinyl-1,3-dioxane (5b)**

Prepared according to the general procedure. The crude mixture was purified by flash column chromatography to give compound **5b** in 86% yield (26 mg) as colorless oil.  $^1\text{H}$  NMR (500 MHz,  $\text{CDCl}_3$ )  $\delta$  7.45 – 7.48 (m, 2H), 6.86 – 6.90 (m, 2H), 5.87 (ddd,  $J = 17.4$ , 10.8, 4.8 Hz, 1H), 5.54 (s, 1H), 5.31 – 5.36 (m, 1H), 5.18 – 5.21 (m, 1H), 4.40 – 4.42 (m, 1H), 3.80 (s, 3H), 3.52 (dd,  $J = 10.0$ , 2.2 Hz, 1H), 2.04 – 2.13 (m, 1H), 1.89 – 1.95 (m, 1H), 1.60 – 1.73 (m, 4H), 1.50 – 1.59 (m, 2H), 1.36 – 1.43 (m, 1H), 1.08 – 1.16 (m, 1H), 0.98 (d,  $J = 6.9$  Hz, 3H).  $^{13}\text{C}$  NMR (126 MHz,  $\text{CDCl}_3$ )  $\delta$  160.1, 137.4, 132.0, 127.8, 115.4, 113.9, 101.4, 86.4, 81.7, 55.7, 41.8, 35.3, 31.0, 27.9, 25.7, 25.6, 6.9. HRMS (EI $^+$ ):  $m/z$  for  $\text{C}_{19}\text{H}_{26}\text{O}_3$   $[\text{M}]^+$  calcd. 302.1882, found: 302.1871.

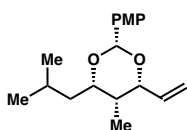

**(2*S*,4*S*,5*R*,6*R*)-4-isobutyl-2-(4-methoxyphenyl)-5-methyl-6-vinyl-1,3-dioxane (5c)**

Prepared according to the general procedure. The crude mixture was purified by flash column chromatography to give compound **5c** in 83% yield (24 mg) as colorless oil.  $^1\text{H}$  NMR (500 MHz,  $\text{CDCl}_3$ )  $\delta$  7.44 – 7.47 (m, 2H), 6.87 – 6.90 (m, 2H), 5.86 (ddd,  $J = 17.4$ , 10.8, 4.7 Hz, 1H), 5.56 (s, 1H), 5.31 – 5.35 (m, 1H), 5.19 – 5.21 (m, 1H), 4.44 – 4.46 (m, 1H), 3.96 – 3.99 (m, 1H), 3.80 (s, 3H), 1.74 – 1.82 (m, 1H), 1.59 – 1.64 (m, 1H), 1.52 – 1.57 (m, 1H), 1.23 – 1.28 (m, 1H), 0.94 – 0.97 (m, 9H).  $^{13}\text{C}$  NMR (126 MHz,  $\text{CDCl}_3$ )  $\delta$  160.2, 137.3, 132.0, 127.8, 115.5, 113.9, 101.5, 81.7, 79.2, 55.6, 41.9, 36.3, 24.6, 23.4, 23.0, 6.7. HRMS (EI $^+$ ):  $m/z$  for  $\text{C}_{18}\text{H}_{26}\text{O}_3$   $[\text{M}]^+$  calcd. 290.1882, found: 290.1898.

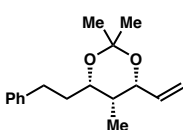

**(4*S*,5*R*,6*R*)-2,2,5-trimethyl-4-phenethyl-6-vinyl-1,3-dioxane (13a)**

Prepared according to the general procedure with 2,2-dimethoxypropane. The crude mixture was purified by flash column chromatography to give compound **13a** in 73% yield (19 mg) as colorless oil.  $^1\text{H}$  NMR (500 MHz,  $\text{CDCl}_3$ )  $\delta$  7.26

– 7.30 (m, 2H), 7.17 – 7.20 (m, 3H), 5.75 – 5.82 (m, 1H), 5.24 (d,  $J = 17.2$  Hz, 1H), 5.15 (d,  $J = 10.8$  Hz, 1H), 4.41 – 4.43 (m, 1H), 3.89 – 3.92 (m, 1H), 2.72 – 2.78 (m, 1H), 2.57 – 2.63 (m, 1H), 1.88 – 1.94 (m, 1H), 1.58 – 1.65 (m, 1H), 1.46 (s, 3H), 1.39 – 1.44 (m, 4H), 0.88 (d,  $J = 6.9$  Hz, 3H).  $^{13}\text{C}$  NMR (126 MHz,  $\text{CDCl}_3$ )  $\delta$  142.4, 137.9, 128.9, 128.7, 126.2, 115.4, 99.4, 74.6, 72.1, 36.4, 34.9, 31.9, 30.4, 20.1, 5.7. HRMS ( $\text{EI}^+$ ):  $m/z$  for  $\text{C}_{17}\text{H}_{24}\text{O}_2$   $[\text{M}]^+$  calcd. 260.1776, found: 260.1793.

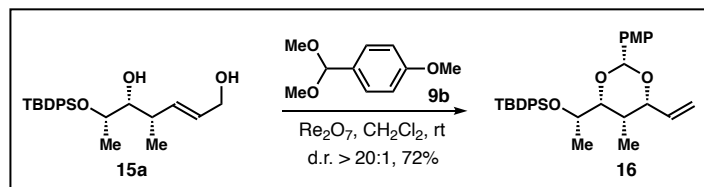

***tert*-Butyl((*S*)-1-((2*R*,4*R*,5*S*,6*R*)-2-(4-methoxyphenyl)-5-methyl-6-vinyl-1,3-dioxan-4-yl)ethoxy)diphenylsilane (16)**: Prepared according to the general procedure using diol **15a** and acetal **9b**. The crude mixture was purified by column chromatography to give the title compound as colorless oil in 72% yield (37 mg, dr > 20:1).  $^1\text{H}$  NMR (500 MHz,  $\text{CDCl}_3$ )  $\delta$  7.68 – 7.72 (m, 4H), 7.34 – 7.44 (m, 8H), 6.83 – 6.86 (m, 2H), 5.89 (ddd,  $J = 17.4, 10.8, 4.6$  Hz, 1H), 5.54 (s, 1H), 5.32 – 5.37 (m, 1H), 5.20 – 5.23 (m, 1H), 4.45 – 4.47 (m, 1H), 3.81 – 3.86 (m, 1H), 3.78 (s, 3H), 3.71 (dd,  $J = 8.7, 2.1$  Hz, 1H), 2.06 – 2.11 (m, 1H), 1.10 (d,  $J = 6.0$  Hz, 3H), 1.04 (s, 9H), 0.88 (d,  $J = 6.9$  Hz, 4H).  $^{13}\text{C}$  NMR (126 MHz,  $\text{CDCl}_3$ )  $\delta$  160.2, 137.3, 136.29, 136.25, 135.2, 133.7, 131.7, 130.1, 129.8, 128.0, 127.8, 127.7, 115.5, 113.8, 101.5, 85.6, 81.6, 69.0, 55.6, 33.4, 27.3, 21.5, 19.6, 6.9. HRMS ( $\text{ESI}^+$ ):  $m/z$  for  $\text{C}_{30}\text{H}_{42}\text{O}_4\text{SiNa}$   $[\text{M}+\text{Na}]^+$  calcd. 517.2750, found: 517.2775.

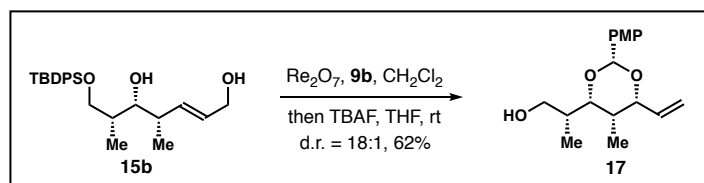

**(*R*)-2-((2*R*,4*S*,5*S*,6*R*)-2-(4-methoxyphenyl)-5-methyl-6-vinyl-1,3-dioxan-4-yl)propan-1-ol (17)**: Prepared according to the general procedure using diol **15b** and acetal **9b** to give crude acetal product. The crude product was dissolved in THF (0.5 mL) and treated with TBAF· $\text{H}_2\text{O}$  (65 mg, 0.25 mmol, 2.5 equiv). Then reaction mixture was kept stirring at ambient temperature for 12 h. Ethyl acetate (1 mL) and brine (1 mL) were added. The organic layer was separated and the aqueous layer was extracted with ethyl acetate (1 mL x 3). The combined organic extracts were dried over anhydrous sodium sulfate, filtered,

and concentrated under reduced pressure. The crude mixture was purified by flash column chromatography to give compound **17** as colorless oil in 62% yield (18 mg, dr = 18:1).  $^1\text{H}$  NMR (500 MHz,  $\text{CDCl}_3$ )  $\delta$  7.45 – 7.48 (m, 2H), 6.88 – 6.91 (m, 2H), 5.86 (ddd,  $J = 17.4, 10.8, 4.7$  Hz, 1H), 5.56 (s, 1H), 5.32 – 5.36 (m, 1H), 5.19 – 5.22 (m, 1H), 4.42 – 4.44 (m, 1H), 3.81 (s, 3H), 3.74 (dd,  $J = 9.6, 2.1$  Hz, 1H), 3.65 – 3.69 (m, 1H), 3.58 – 3.63 (m, 1H), 1.91 – 1.99 (m, 1H), 1.74 – 1.79 (m, 1H), 1.33 (t,  $J = 5.5$  Hz, 1H), 1.13 (d,  $J = 6.7$  Hz, 3H), 1.00 (d,  $J = 6.8$  Hz, 3H).  $^{13}\text{C}$  NMR (126 MHz,  $\text{CDCl}_3$ )  $\delta$  160.2, 137.1, 131.9, 127.8, 115.6, 113.9, 101.7, 83.1, 81.5, 64.5, 55.7, 37.1, 34.6, 14.3, 7.1. HRMS (ESI $^+$ ):  $m/z$  for  $\text{C}_{17}\text{H}_{24}\text{O}_4\text{Na}$   $[\text{M}+\text{Na}]^+$  calcd. 315.1572, found: 315.1569.

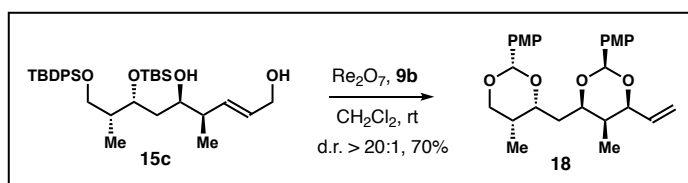

**(2R,4R,5S,6S)-2-(4-methoxyphenyl)-4-(((2S,4R,5R)-2-(4-methoxyphenyl)-5-methyl-1,3-dioxan-4-yl)methyl)-5-methyl-6-vinyl-1,3-dioxane (18)**: Prepared according to the general procedure using diol **15c** and acetal **9b** (3 equiv) for 24 h. The crude mixture was purified by column chromatography to give compound **18** as colorless oil in 70% yield (32 mg, dr > 20:1).  $^1\text{H}$  NMR (500 MHz,  $\text{CDCl}_3$ )  $\delta$  7.42 – 7.48 (m, 4H), 6.89 – 6.92 (m, 4H), 5.83 (ddd,  $J = 17.3, 10.8, 4.7$  Hz, 1H), 5.57 (s, 1H), 5.49 (s, 1H), 5.28 – 5.32 (m, 1H), 5.17 – 5.20 (m, 1H), 4.43 – 4.45 (m, 1H), 4.15 – 4.20 (m, 2H), 4.07 (dd,  $J = 11.2, 2.6$  Hz, 1H), 3.98 (dd,  $J = 11.1, 1.3$  Hz, 1H), 3.81 (app. s, 6H), 1.63 – 1.72 (m, 2H), 1.51 – 1.57 (m, 2H), 1.19 (d,  $J = 6.9$  Hz, 3H), 0.99 (d,  $J = 6.8$  Hz, 3H).  $^{13}\text{C}$  NMR (126 MHz,  $\text{CDCl}_3$ )  $\delta$  160.28, 160.27, 137.1, 132.0, 131.9, 127.9, 127.7, 115.6, 114.01, 113.96, 102.0, 101.6, 81.5, 76.9, 76.2, 74.1, 55.7 (two overlapping carbon signals), 37.4, 36.7, 32.8, 11.7, 6.8. HRMS (ESI $^+$ ):  $m/z$  for  $\text{C}_{27}\text{H}_{35}\text{O}_6$   $[\text{M}+\text{H}]^+$  calcd. 455.2434, found: 455.2425.

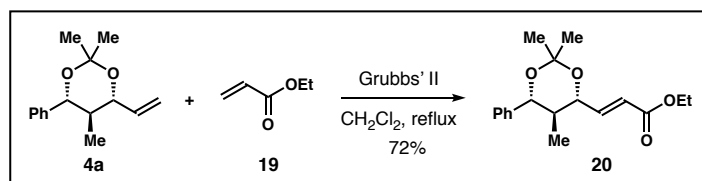

**Ethyl (E)-3-((4R,5R,6R)-2,2,5-trimethyl-6-phenyl-1,3-dioxan-4-yl)acrylate (20)**: To an oven-dried 2-dram vial equipped with a magnetic stirring bar was added Grubbs 2nd generation catalyst (8 mg, 0.01 mmol, 10 mol %). Then acrylate **19** (50 mg, 0.5 mmol, 5

equiv) was added to the vial followed by the addition of a solution of acetal **4a** (23 mg, 0.10 mmol, 1.0 equiv) in dichloromethane (0.5 mL). The reaction mixture was kept stirring under argon in refluxing CH<sub>2</sub>Cl<sub>2</sub> for 12 h. After complete consumption of acetal **4a**, the reaction mixture was diluted with diethyl ether (10 mL). The resulting mixture was filtered through a shot pad of silica gel, and the filtrate was concentrated under reduced pressure. The crude reaction product was purified by flash column chromatography (gradient elution with hexane and ethyl acetate, 30:1 to 10:1) to give product **20** as colorless oil (22 mg, 72% yield). <sup>1</sup>H NMR (500 MHz, CDCl<sub>3</sub>) δ 7.32 – 7.37 (m, 4H), 7.28 – 7.32 (m, 1H), 6.96 (dd, *J* = 15.6, 5.7 Hz, 1H), 6.13 (dd, *J* = 15.6, 1.4 Hz, 1H), 4.48 (d, *J* = 10.2 Hz, 1H), 4.28 (dd, *J* = 10.3, 5.7 Hz, 1H), 4.21 (q, *J* = 7.1 Hz, 2H), 1.62 – 1.71 (m, 1H), 1.59 (s, 3H), 1.52 (s, 3H), 1.29 (t, *J* = 7.1 Hz, 4H), 0.69 (d, *J* = 6.6 Hz, 3H). <sup>13</sup>C NMR (126 MHz, CDCl<sub>3</sub>) δ 166.7, 145.5, 140.3, 128.8, 128.6, 128.0, 122.9, 99.4, 78.6, 74.9, 60.8, 40.5, 30.4, 19.9, 14.6, 12.5. HRMS (ESI<sup>+</sup>): *m/z* for C<sub>18</sub>H<sub>28</sub>O<sub>4</sub>N [M+NH<sub>4</sub>]<sup>+</sup> calcd. 322.2018, found: 322.2002.

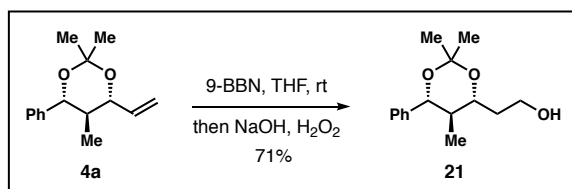

**2-((4*R*,5*R*,6*R*)-2,2,5-trimethyl-6-phenyl-1,3-dioxan-4-yl)ethan-1-ol (21):** In an Ar-filled glove box, **4a** (70 mg, 0.30 mmol, 1.0 equiv), THF (0.5 mL), 9-BBN (110 mg, 0.45 mmol, 1.5 equiv) and a Teflon-coated magnetic stirring bar were sequentially added to a 1-dram vial. And the mixture was kept stirring for 2 h at ambient temperature in the glove box. After complete consumption of **4a**, the vial was removed from the glove box. An aqueous solution of NaOH (3 N, 0.5 mL) was added to the reaction mixture, followed by slow addition a solution of 30% H<sub>2</sub>O<sub>2</sub> (0.5 mL). The resulting mixture was kept stirring at ambient temperature for 1 h. Then diethyl ether (1 mL) and brine (1 mL) was added. The organic layer was separated and the aqueous layer was extracted with Et<sub>2</sub>O (2 mL x 3). The combined organic extracts were dried over anhydrous sodium sulfate, filtered, and concentrated under reduced pressure. Purification of the crude product was performed by flash column chromatography (gradient elution with hexane and ethyl acetate 20:1 to 10:1) to give alcohol **21** in 71% yield (53 mg). <sup>1</sup>H NMR (500 MHz, CDCl<sub>3</sub>) δ 7.32 – 7.38 (m, 4H), 7.27 – 7.31 (m, 1H), 4.44 (d, *J* = 10.3 Hz, 1H), 3.90 – 3.94 (m, 1H), 3.77 – 3.87 (m, 2H), 2.73 (dd, *J* = 7.1, 3.9 Hz, 1H), 1.94 – 2.00 (m, 1H), 1.66 –

1.76 (m, 2H), 1.59 (s, 3H), 1.48 (s, 3H), 0.64 (d,  $J = 6.7$  Hz, 3H).  $^{13}\text{C}$  NMR (126 MHz,  $\text{CDCl}_3$ )  $\delta$  140.6, 128.7, 128.5, 128.0, 99.1, 78.8, 76.0, 61.5, 40.6, 35.2, 30.6, 20.0, 12.5.

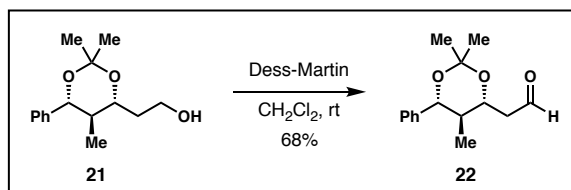

**2-((4R,5R,6R)-2,2,5-trimethyl-6-phenyl-1,3-dioxan-4-yl)acetaldehyde (22):** To a reaction vial containing a Teflon-coated magnetic stirring bar were added alcohol **21** (50 mg, 0.20 mmol, 1.0 equiv), Dess-Martin periodinane (127 mg, 0.30 mmol, 1.5 equiv) and dichloromethane (1.0 mL). The reaction mixture was allowed to stir at ambient temperature for 2 h. After complete consumption of alcohol **21**, the reaction mixture was diluted with diethyl ether (5 mL). The resulting suspension was filtered through a short pad of silica gel. The filtrate was concentrated under reduced pressure. Purification of the crude product was performed by flash column chromatography (gradient elution with hexane and ethyl acetate, 30:1 to 10:1) to give aldehyde **22** in 68% yield (34 mg).  $^1\text{H}$  NMR (500 MHz,  $\text{CDCl}_3$ )  $\delta$  9.84 (dd,  $J = 2.9, 1.6$  Hz, 1H), 7.32 – 7.39 (m, 4H), 7.32 – 7.28 (m, 1H), 4.47 (d,  $J = 10.2$  Hz, 1H), 4.21 – 4.26 (m, 1H), 2.63 – 2.67 (m, 1H), 2.54 – 2.60 (m, 1H), 1.62 – 1.71 (m, 1H), 1.59 (s, 3H), 1.46 (s, 3H), 0.65 (d,  $J = 6.7$  Hz, 3H).  $^{13}\text{C}$  NMR (126 MHz,  $\text{CDCl}_3$ )  $\delta$  201.9, 140.4, 128.8, 128.6, 128.0, 99.3, 78.7, 71.3, 47.5, 40.8, 30.4, 19.9, 12.5.

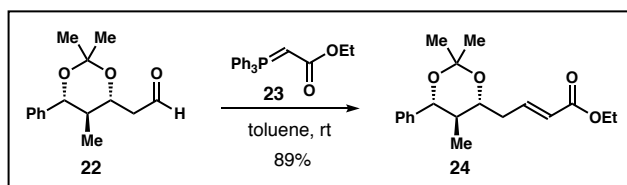

**Ethyl (*E*)-4-((4R,5R,6R)-2,2,5-trimethyl-6-phenyl-1,3-dioxan-4-yl)but-2-enoate (24):** To a 2-dram vial containing a Teflon-coated magnetic stirring bar was added aldehyde **22** (12 mg, 0.05 mmol, 1.0 equiv). Then ethyl (triphenylphosphoranylidene)acetate **23** (35 mg, 0.1 mmol, 2.0 equiv) and toluene (0.3 mL) were added to the vial. The reaction mixture was kept stirring for 48 h at ambient temperature. After complete consumption of **22**, the mixture was diluted with diethyl ether (10 mL). The resulting solution was filtered through a short pad of silica gel. The filtrate was concentrated under reduced pressure. Purification of the crude product was performed by flash column chromatography



(gradient elution with hexane and ethyl acetate, 30:1 to 10:1) to give product **24** in 89% yield (14 mg, *E:Z* > 20:1). <sup>1</sup>H NMR (500 MHz, CDCl<sub>3</sub>) δ 7.31 – 7.37 (m, 4H), 7.27 – 7.31 (m, 1H), 7.06 (dt, *J* = 15.7, 7.0 Hz, 1H), 5.89 (d, *J* = 15.7 Hz, 1H), 4.42 (d, *J* = 10.3 Hz, 1H), 4.20 (q, *J* = 7.1 Hz, 2H), 3.77 – 3.81 (m, 1H), 2.53 – 2.59 (m, 1H), 2.34 – 2.41 (m, 1H), 1.57 – 1.65 (m, 1H), 1.55 (s, 3H), 1.47 (s, 3H), 1.30 (t, *J* = 7.1 Hz, 3H), 0.64 (d, *J* = 6.6 Hz, 3H). <sup>13</sup>C NMR (126 MHz, CDCl<sub>3</sub>) δ 166.9, 145.7, 140.7, 128.7, 128.4, 128.1, 123.5, 99.2, 78.7, 74.0, 60.6, 40.4, 36.3, 30.5, 19.9, 14.6, 12.5. HRMS (ESI<sup>+</sup>): *m/z* for C<sub>19</sub>H<sub>26</sub>O<sub>4</sub>Na [M+Na]<sup>+</sup> calcd. 341.1729, found: 341.1720.

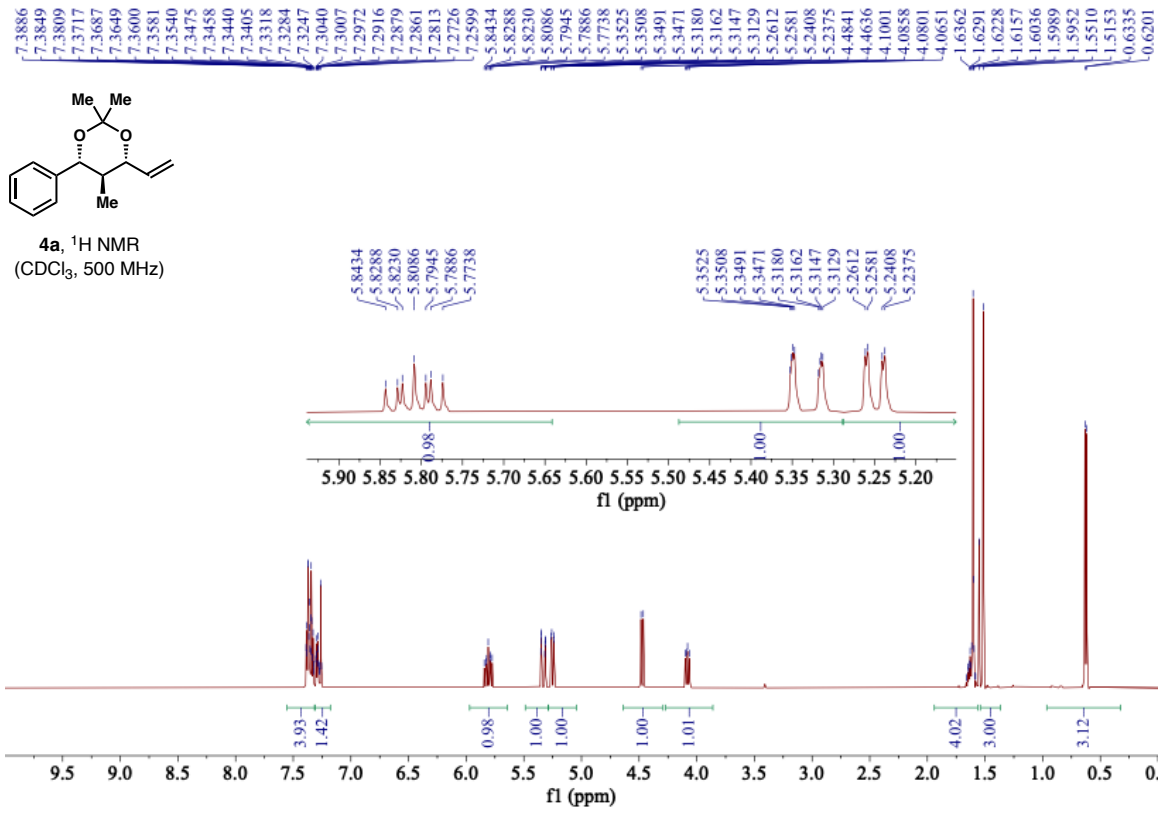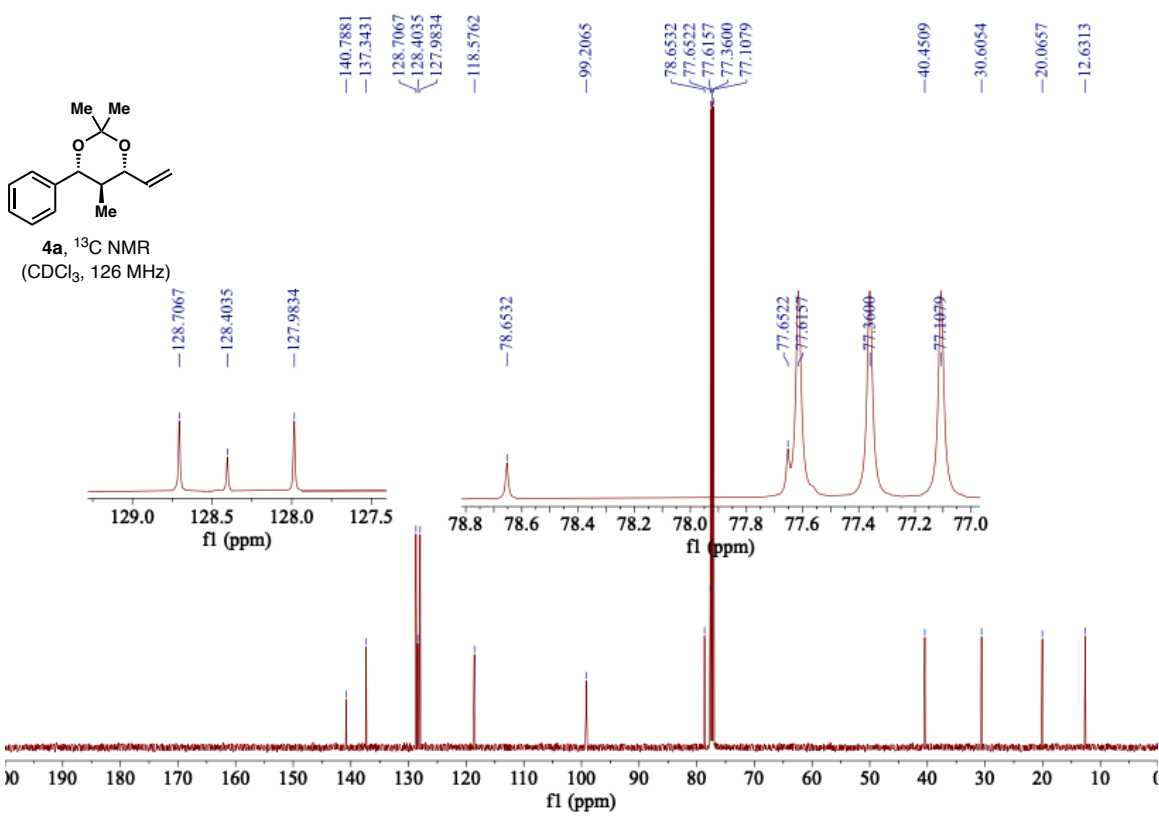

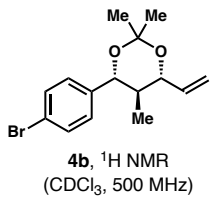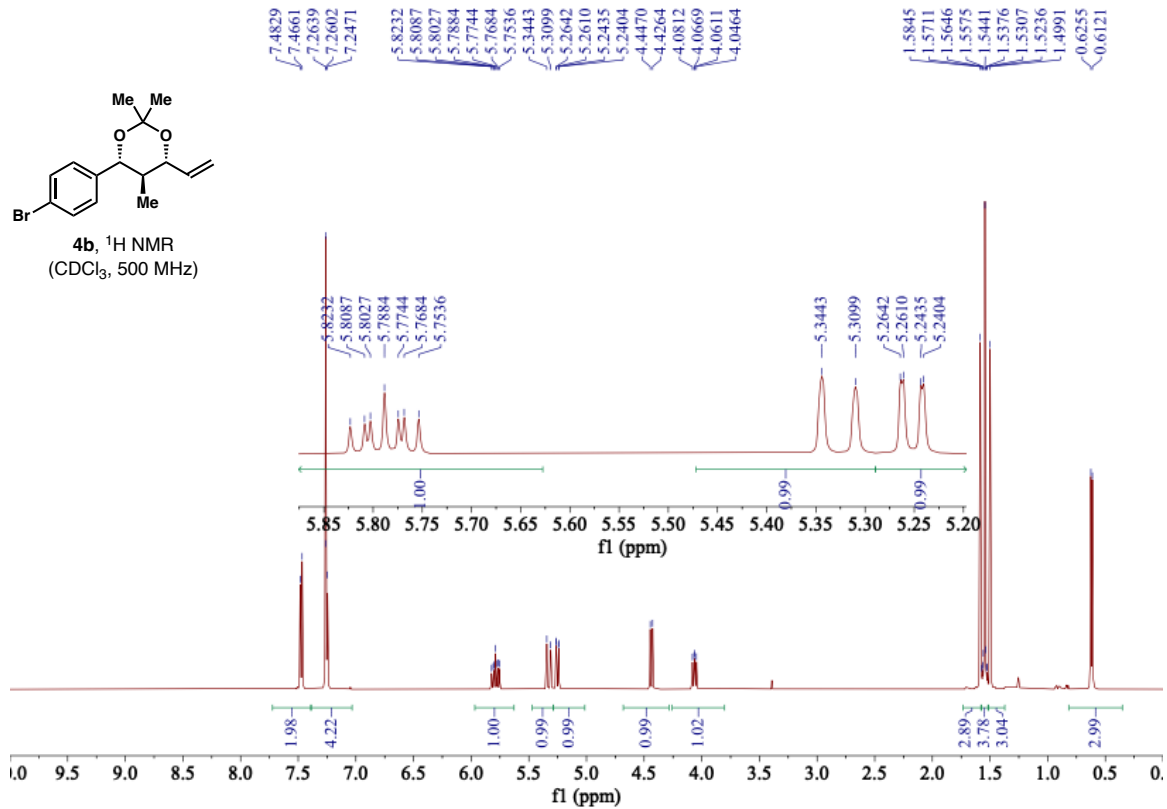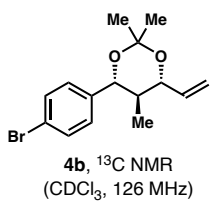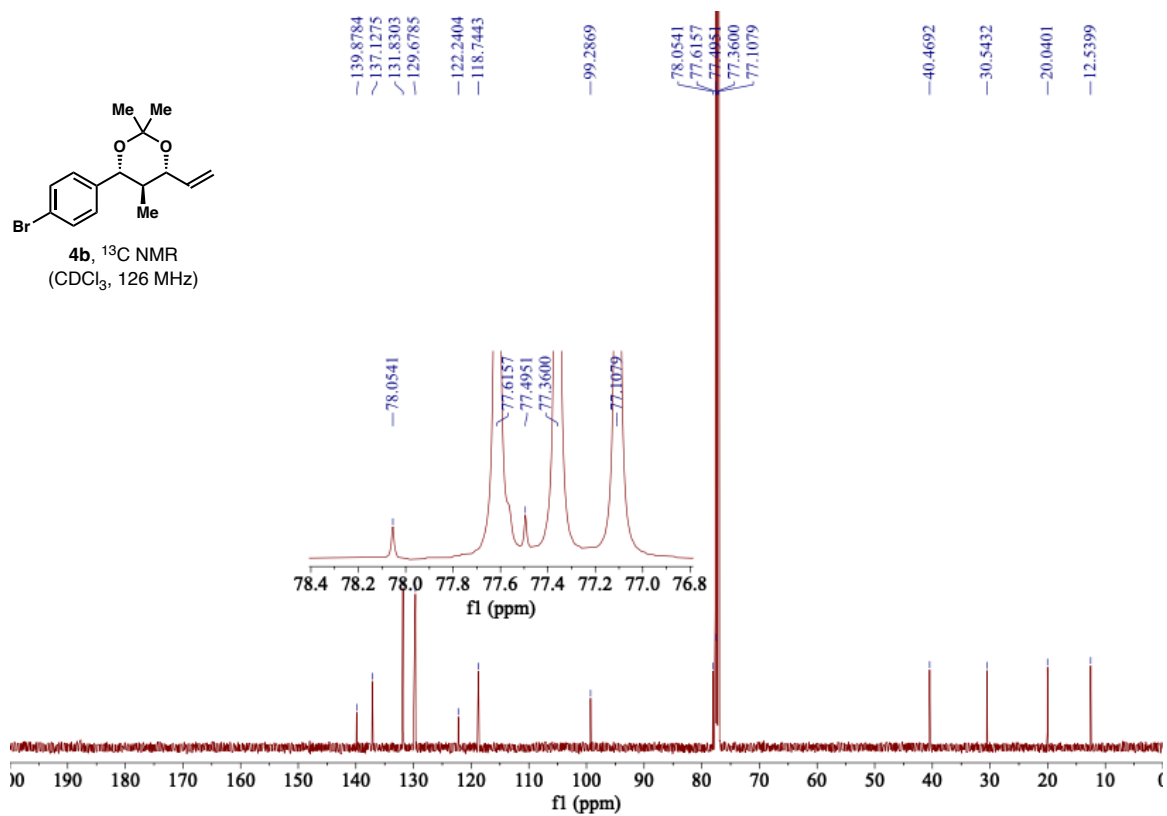

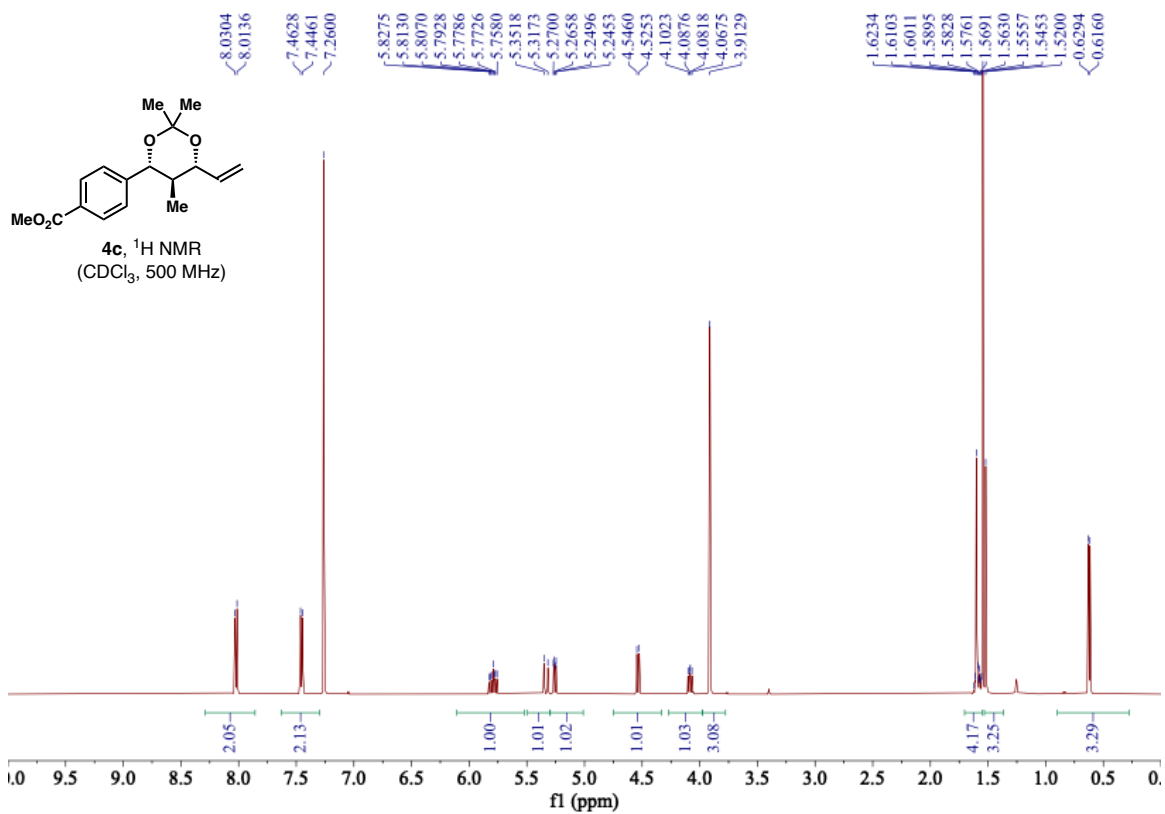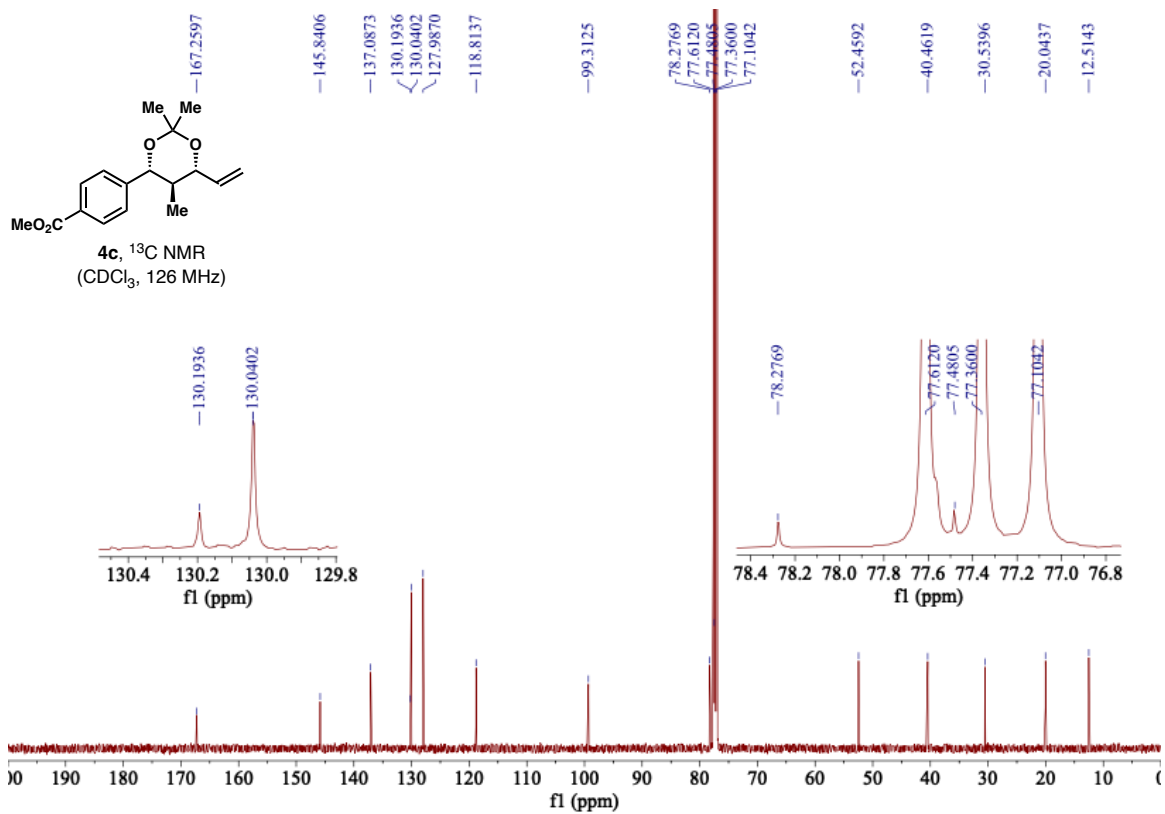

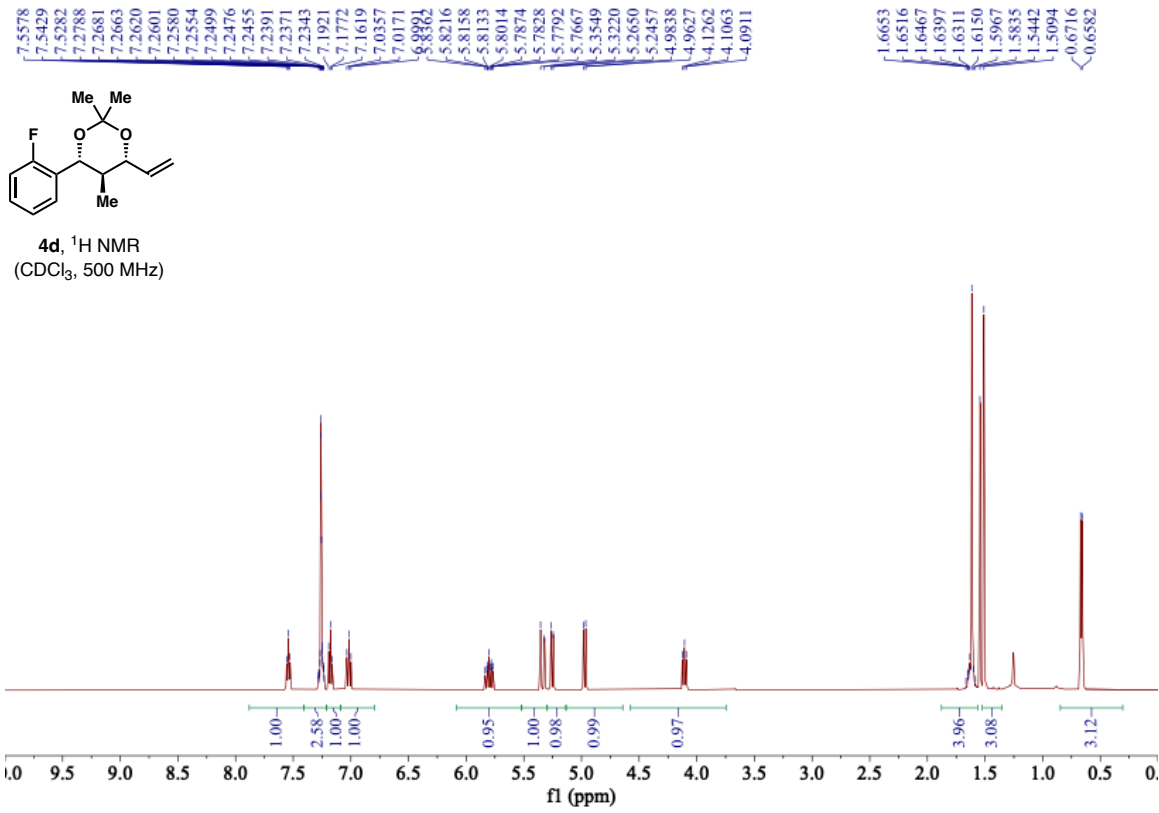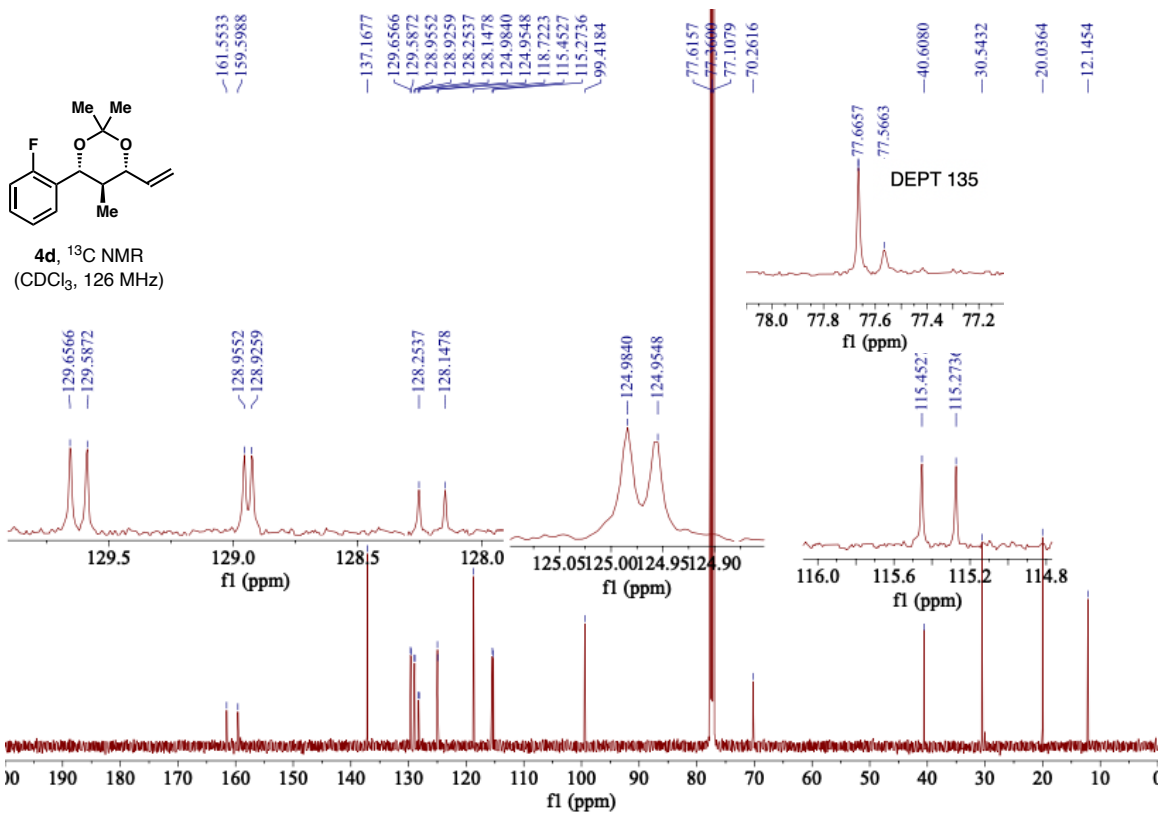

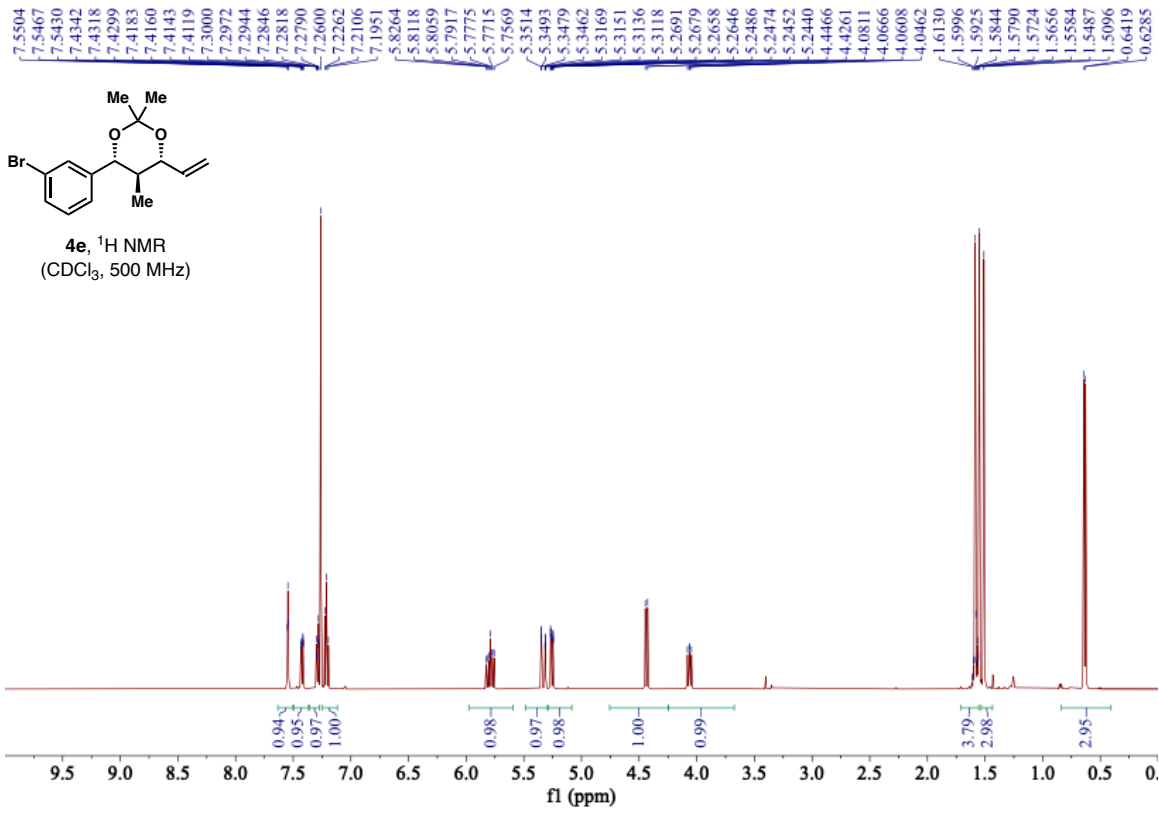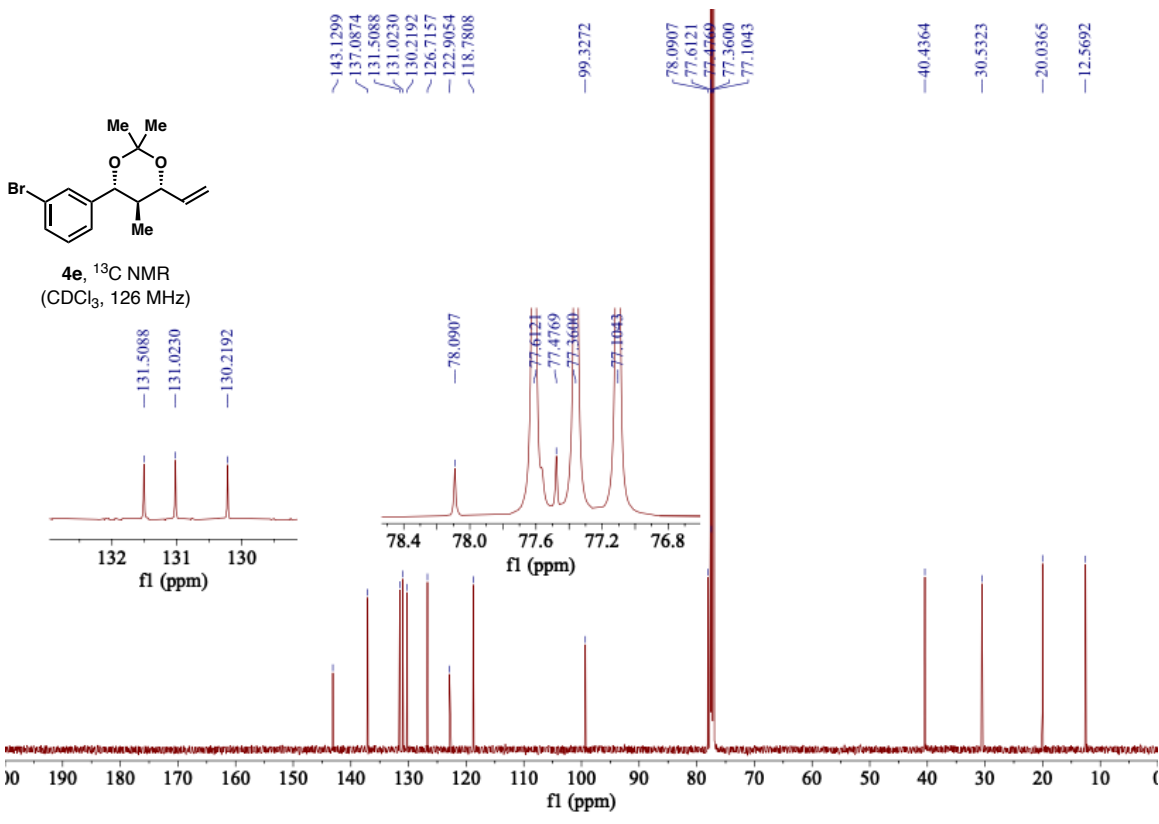

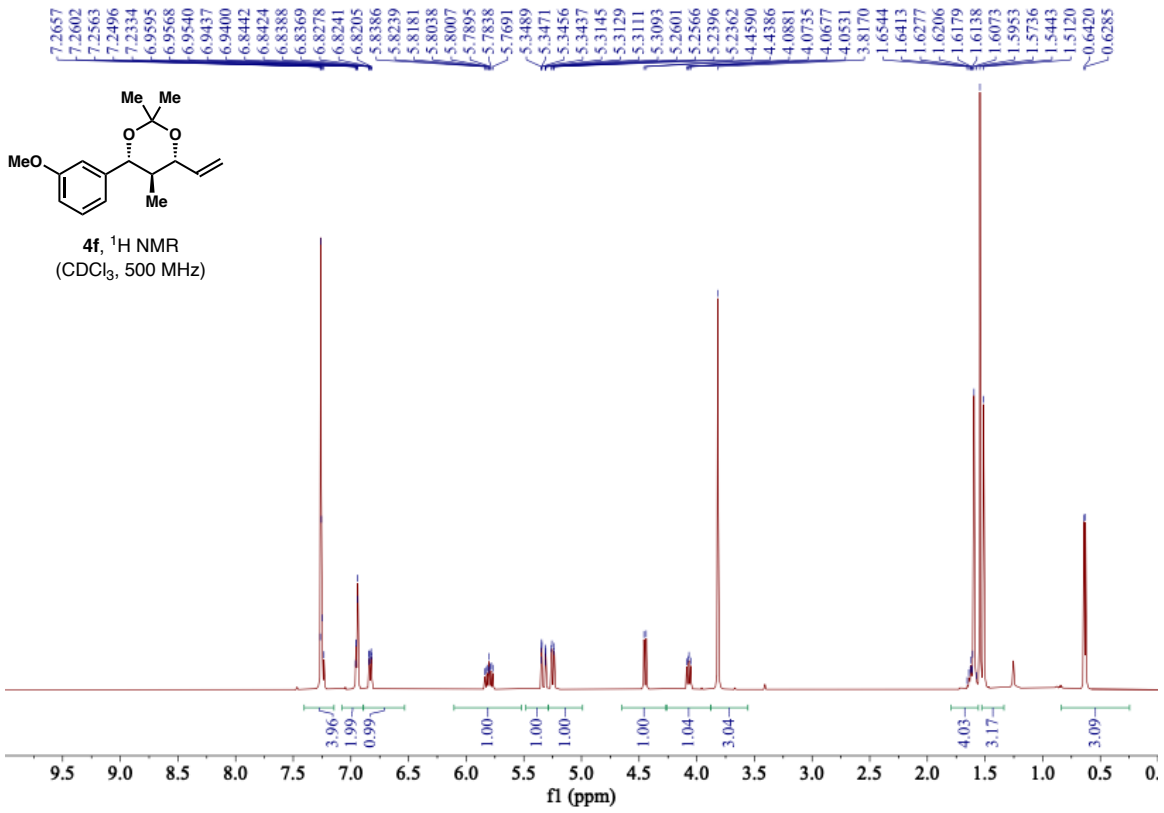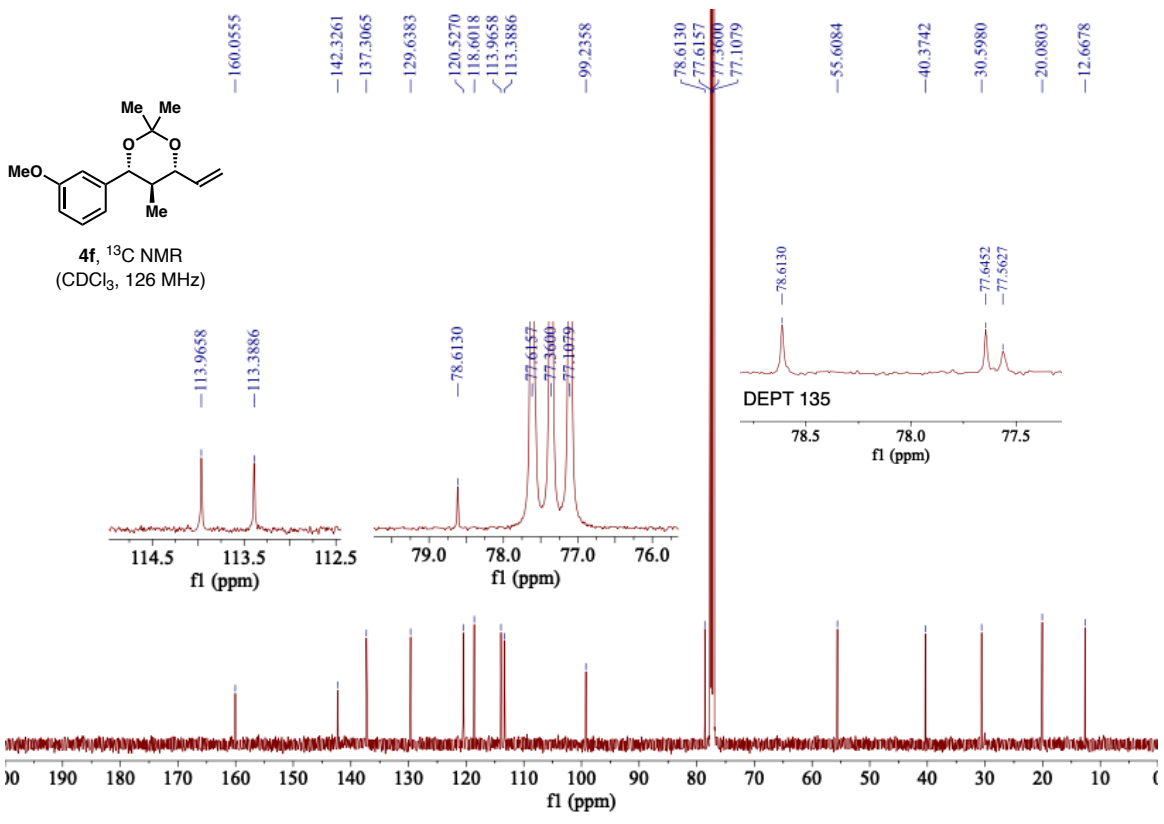

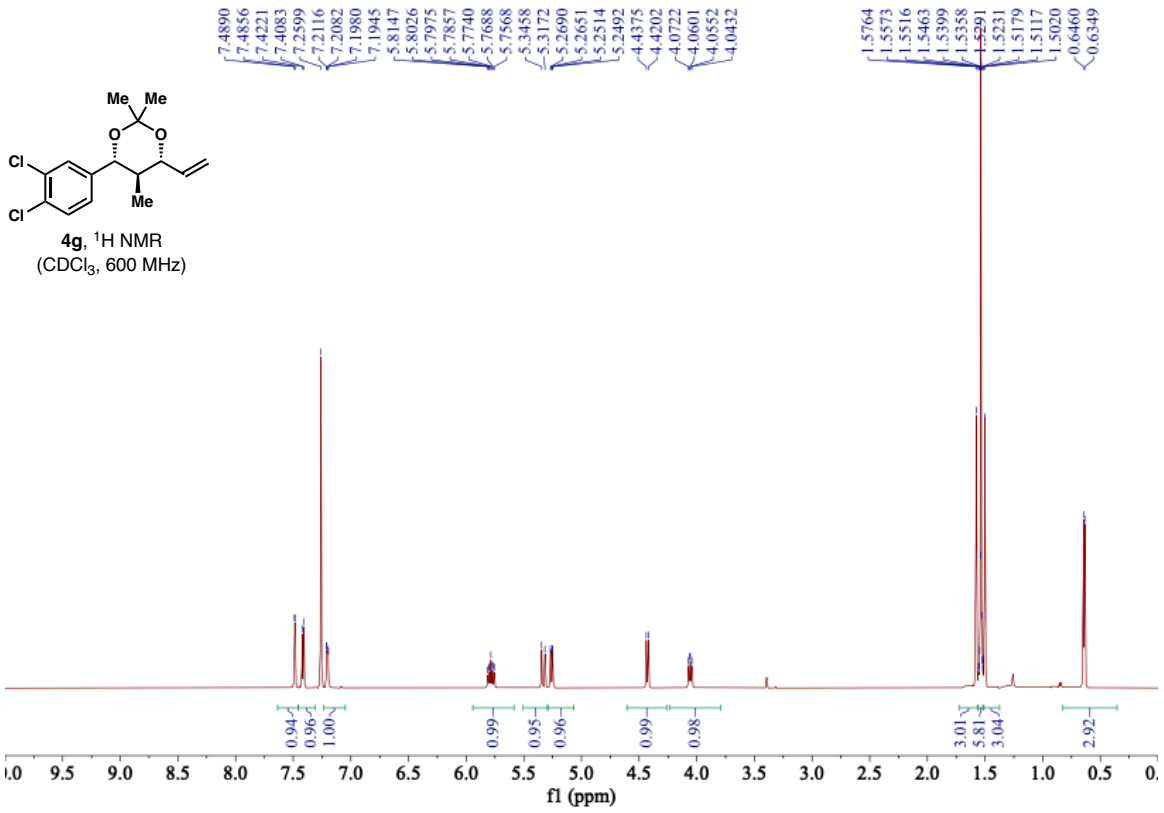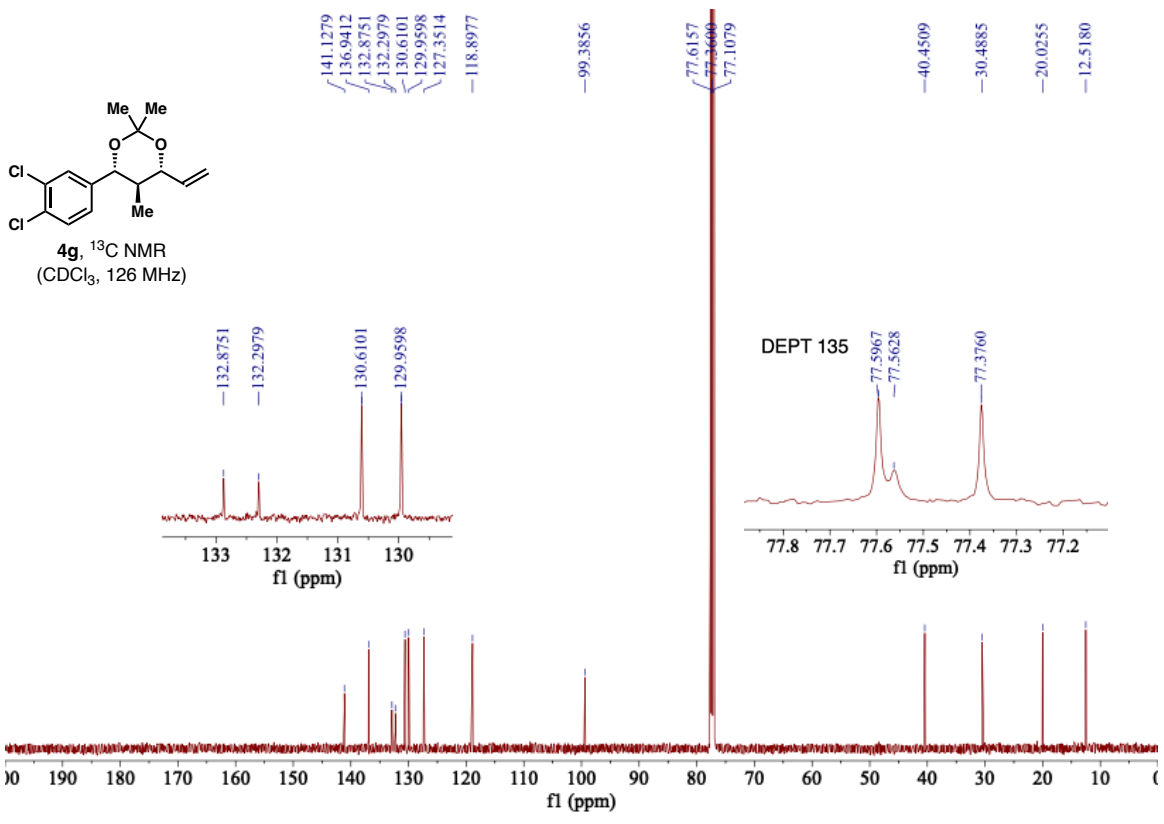



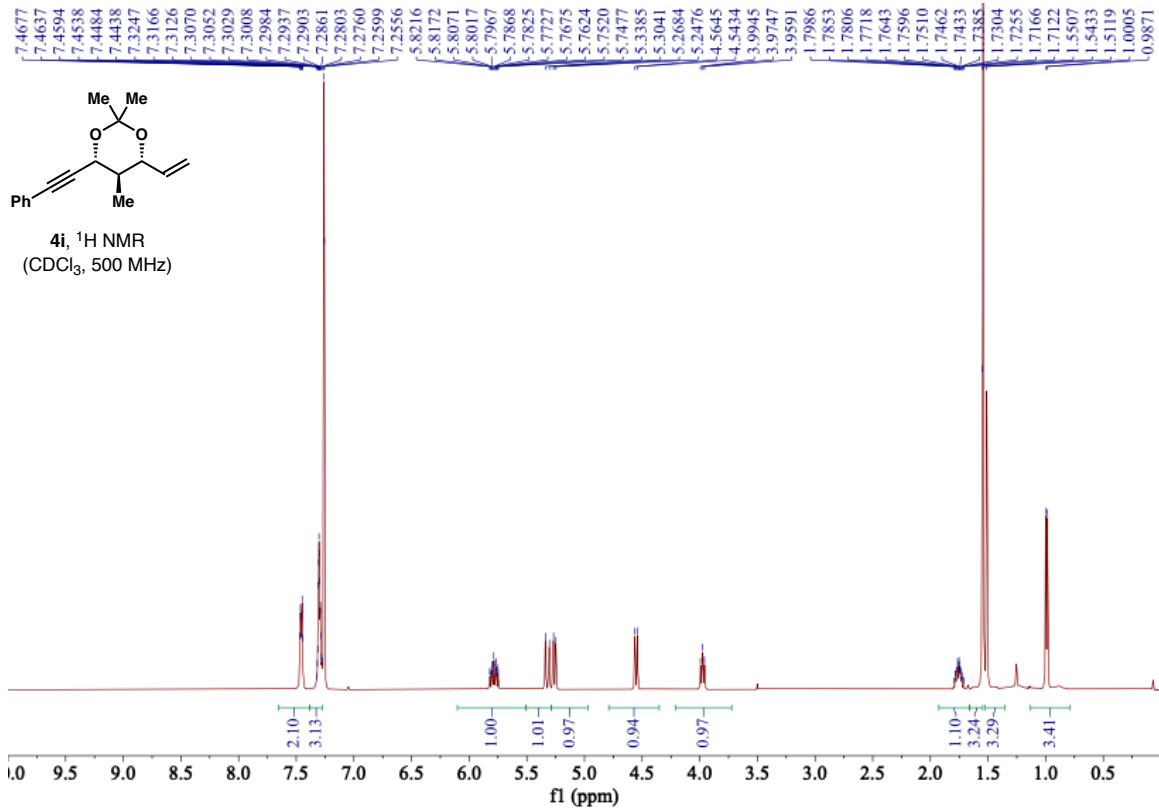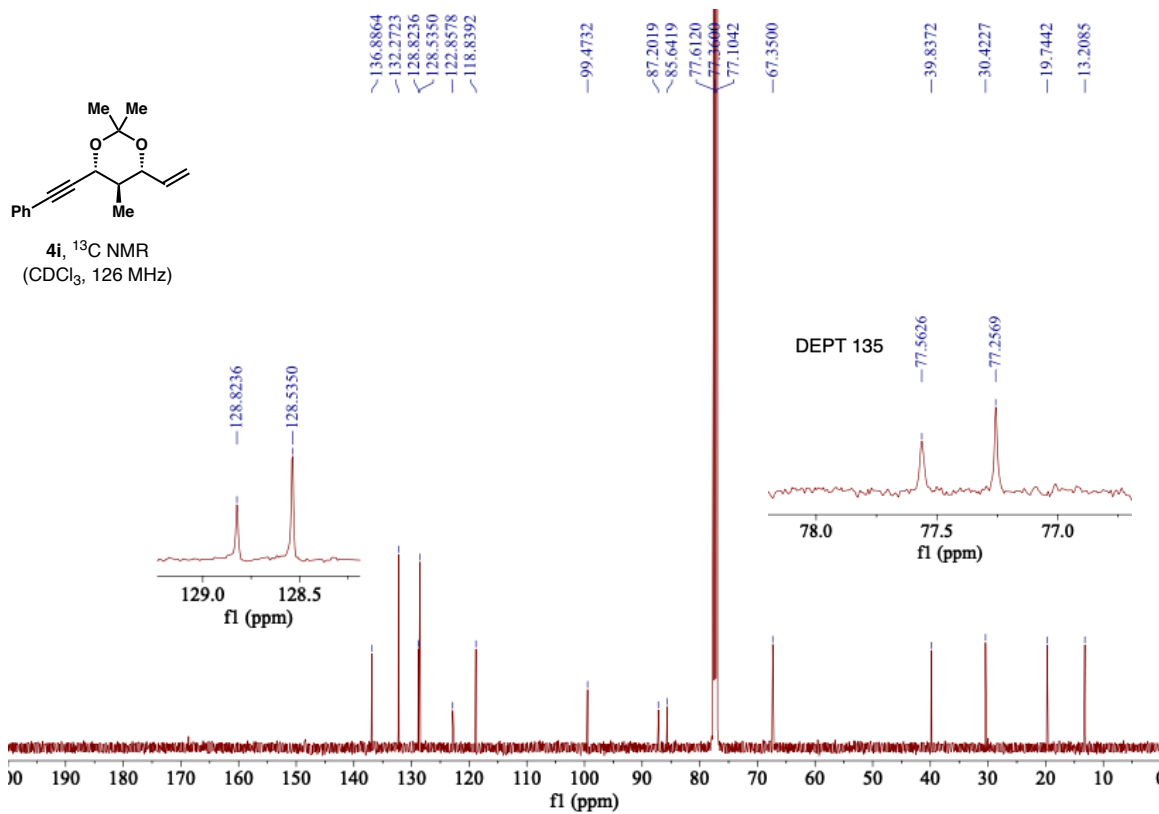

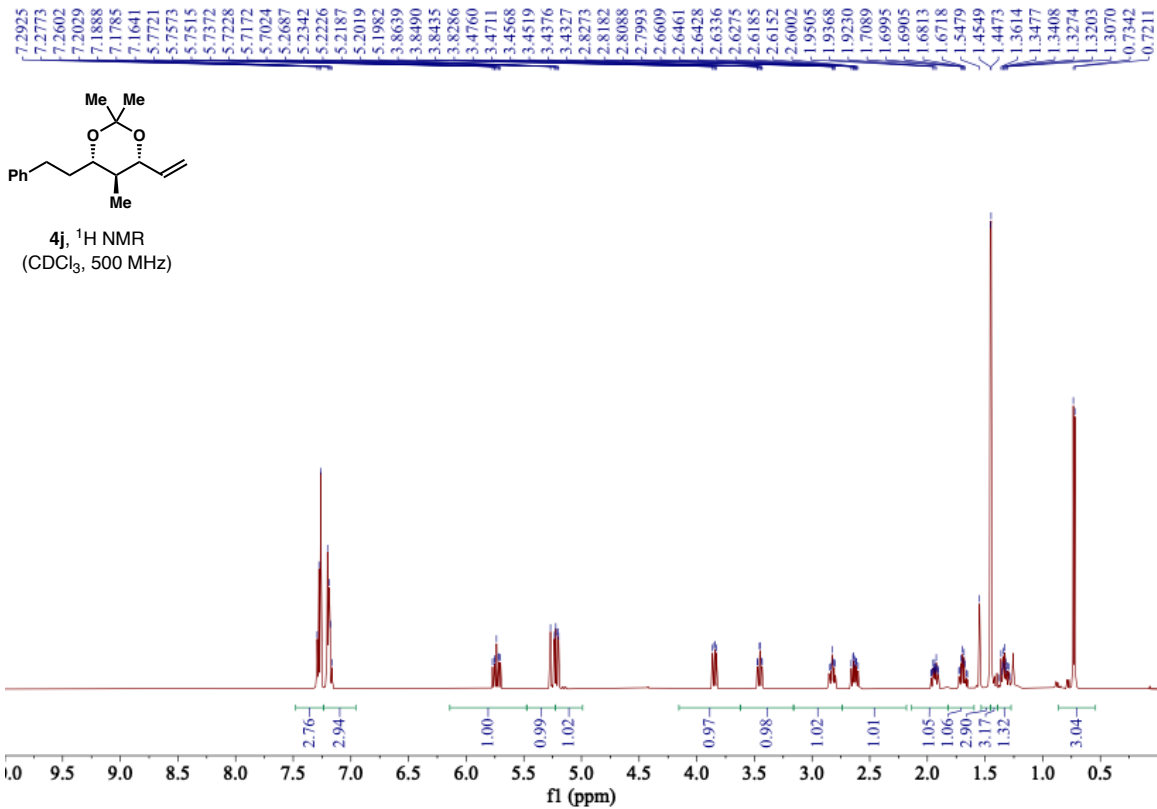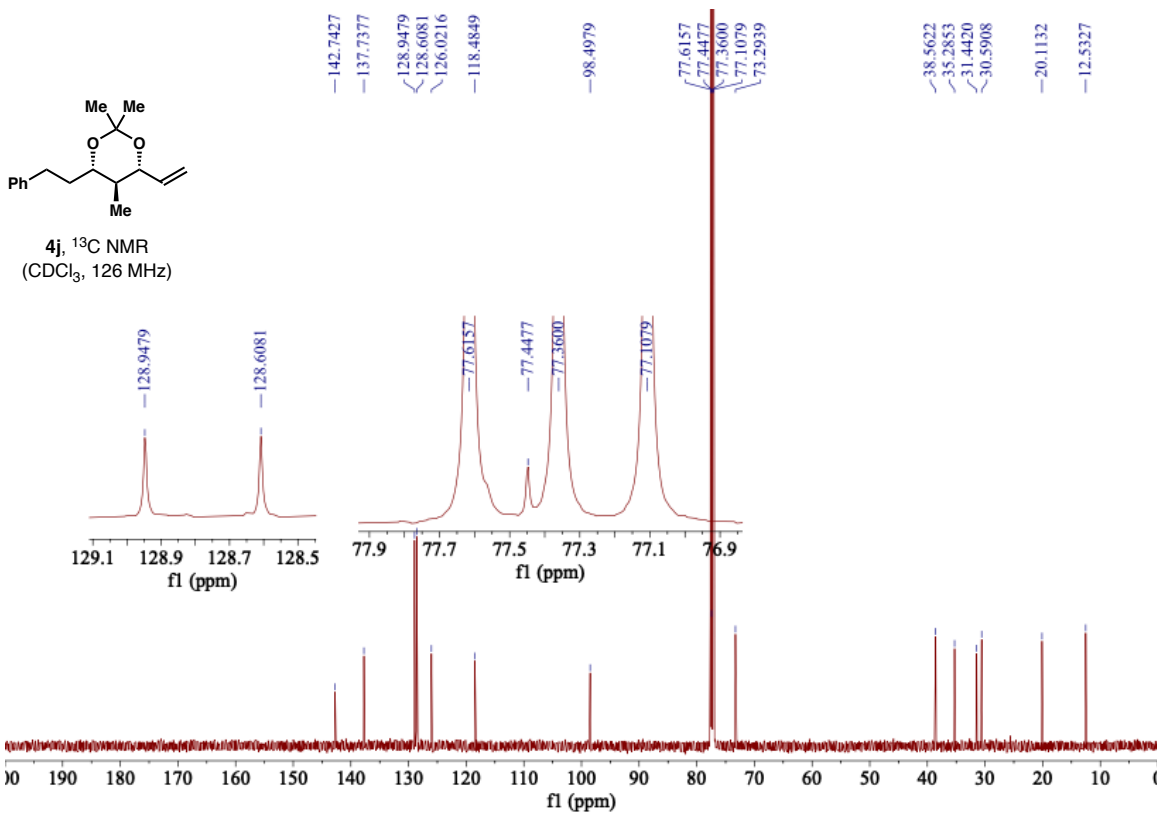

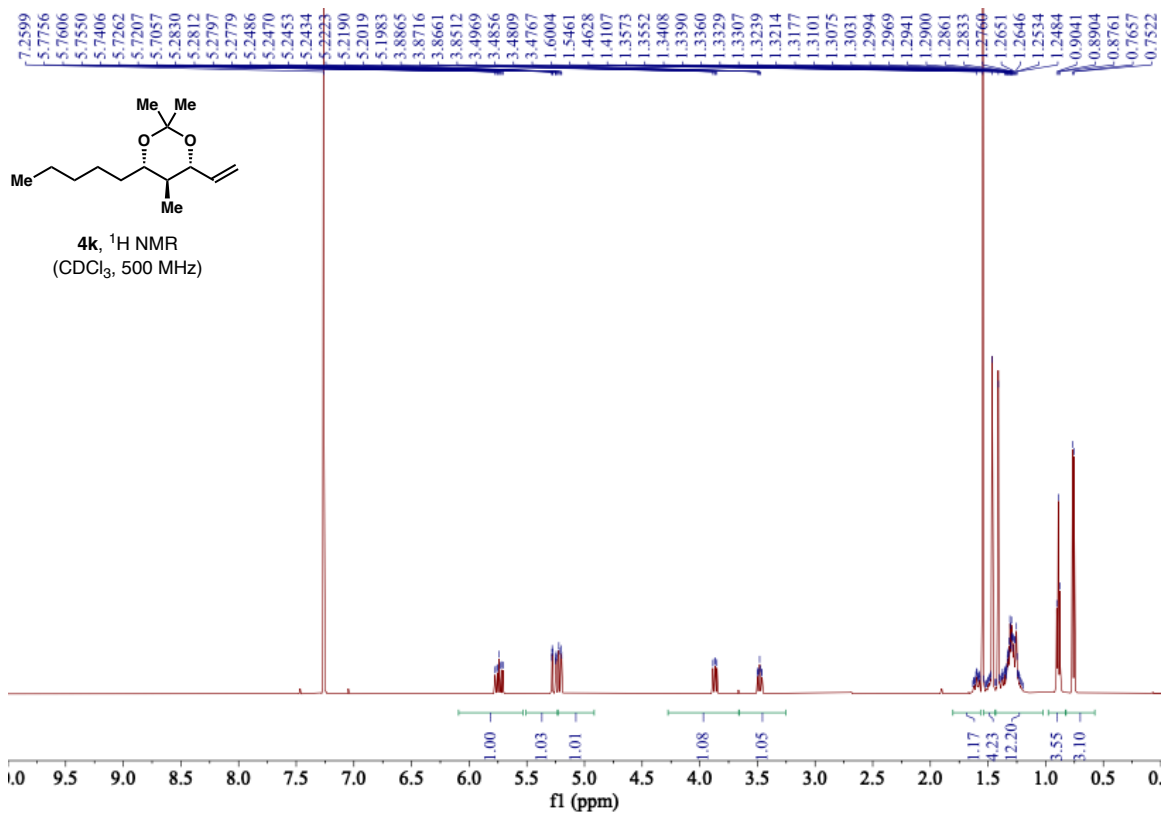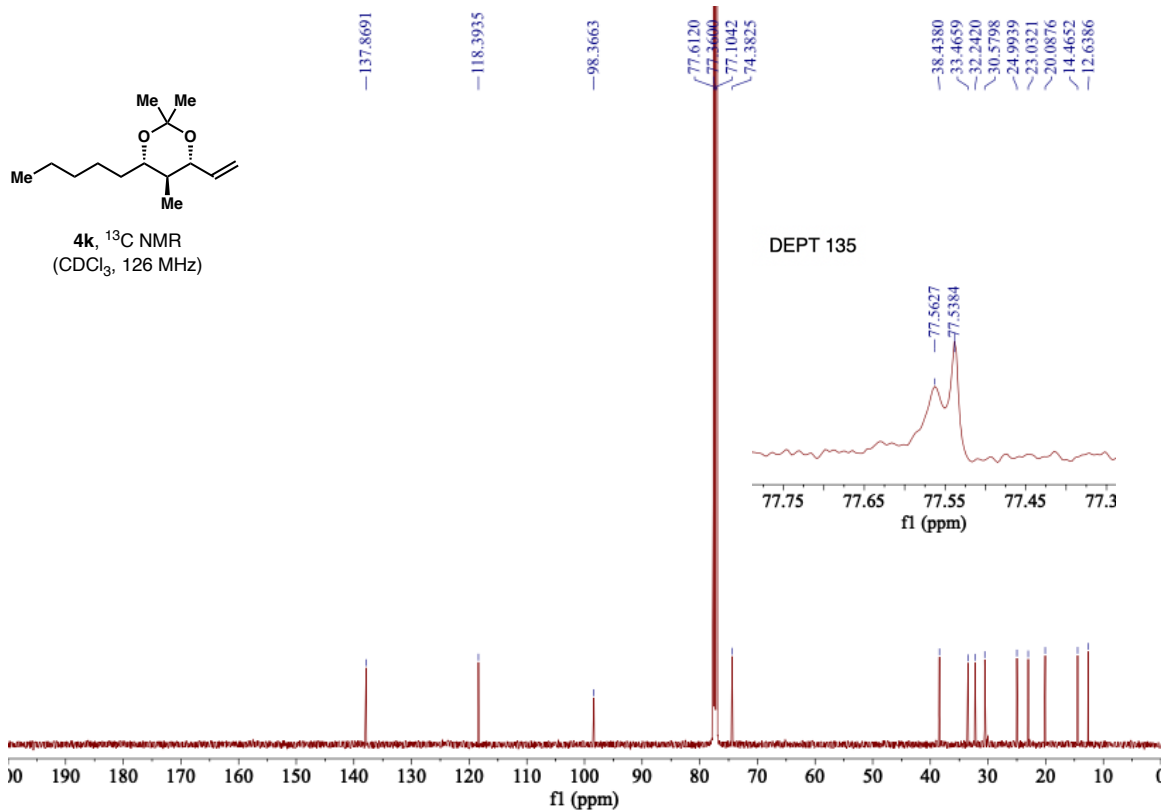

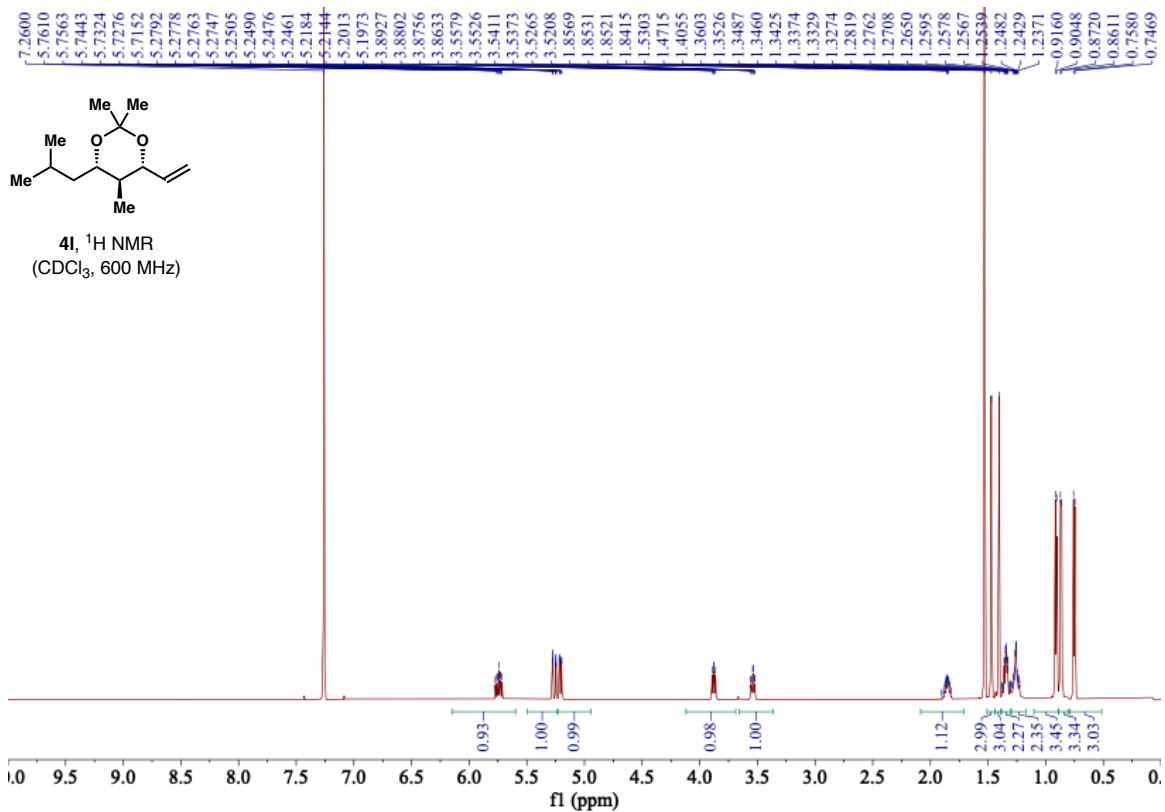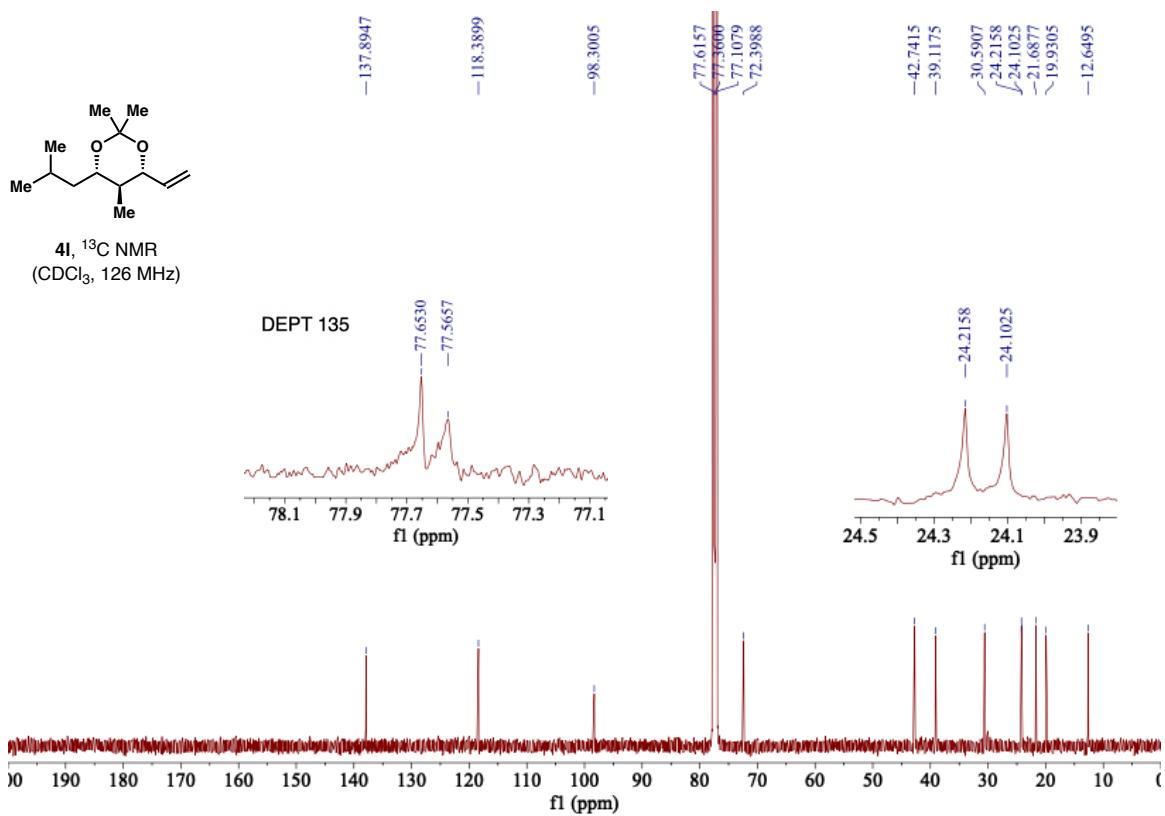

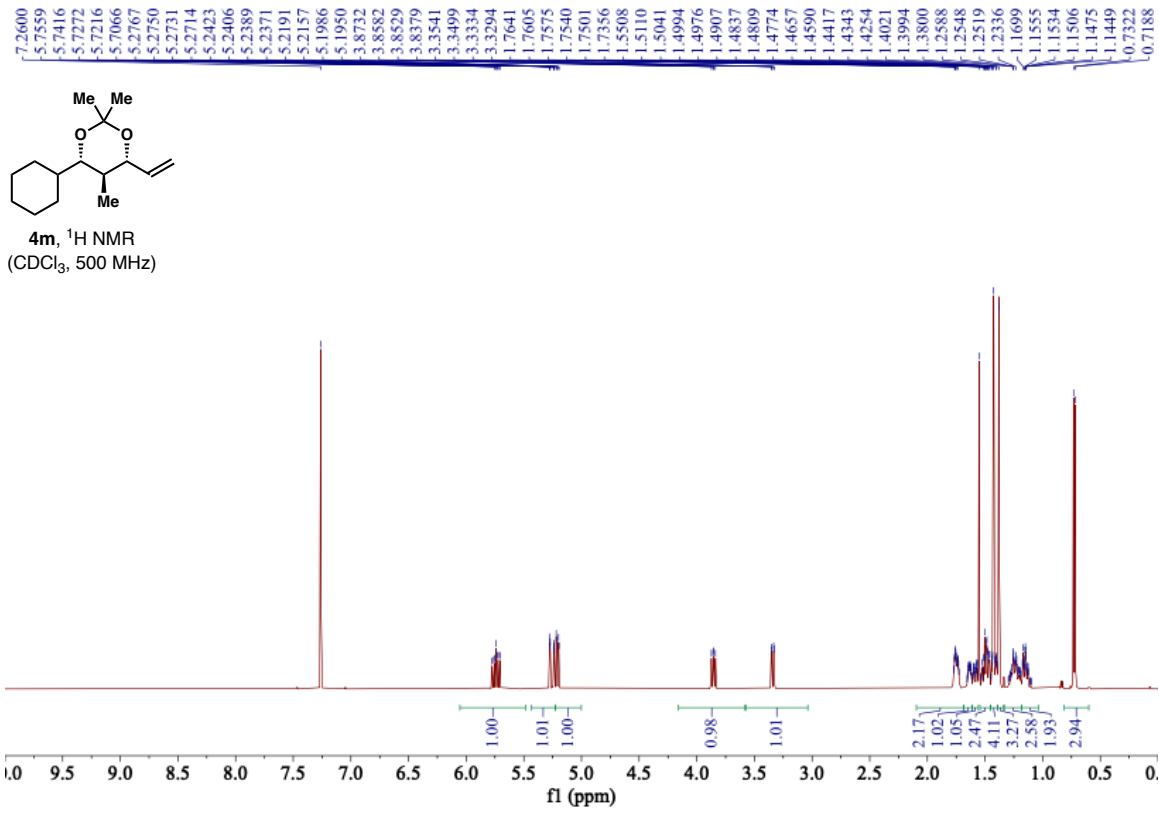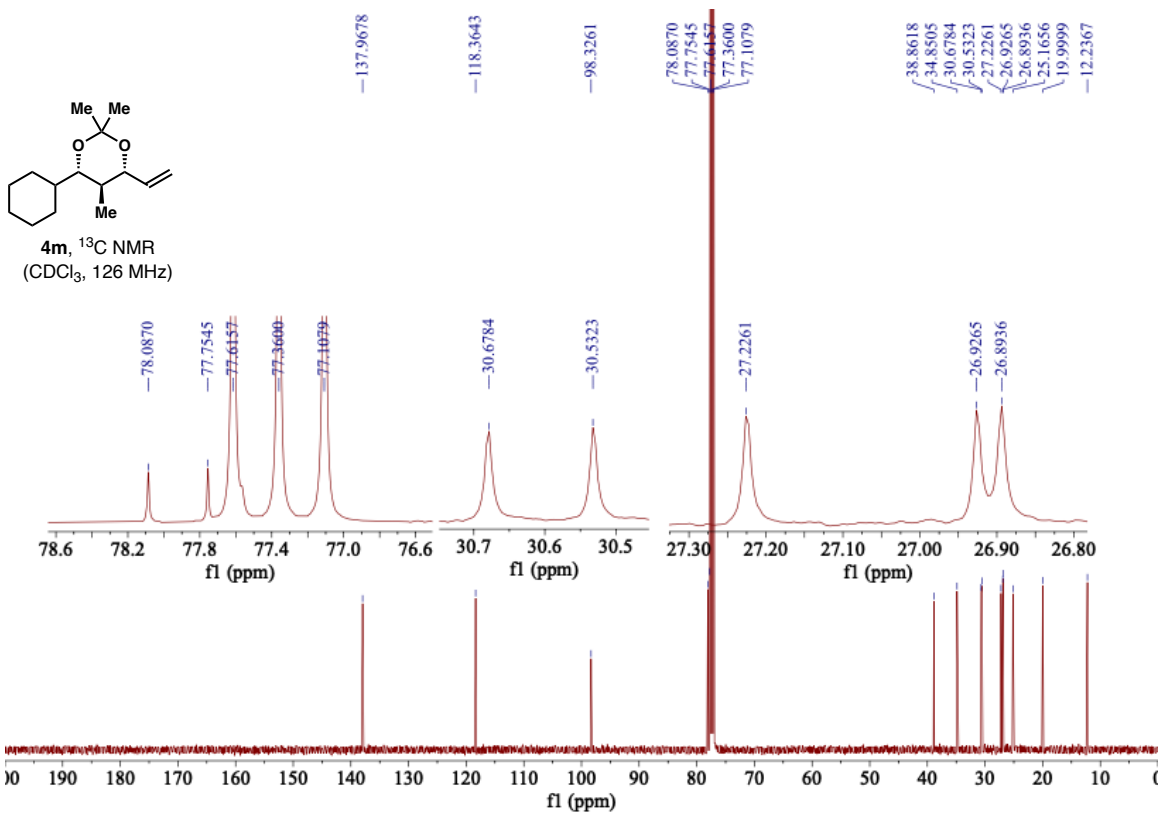

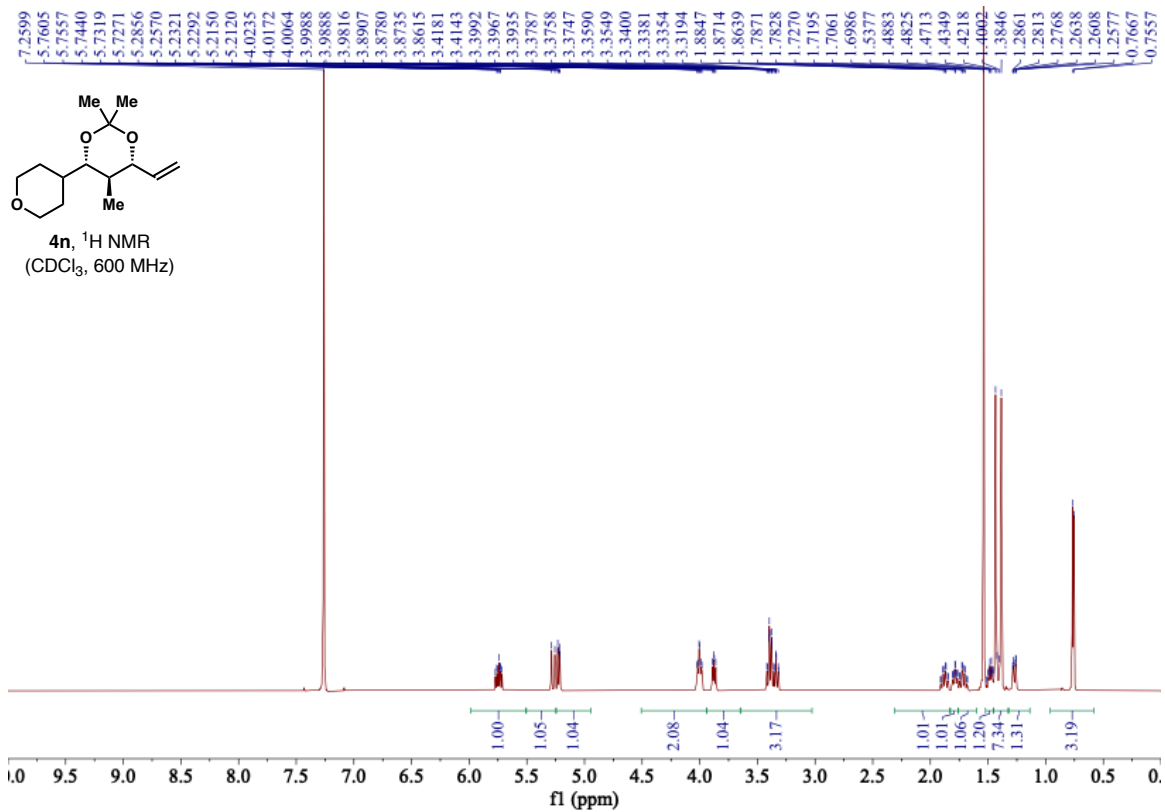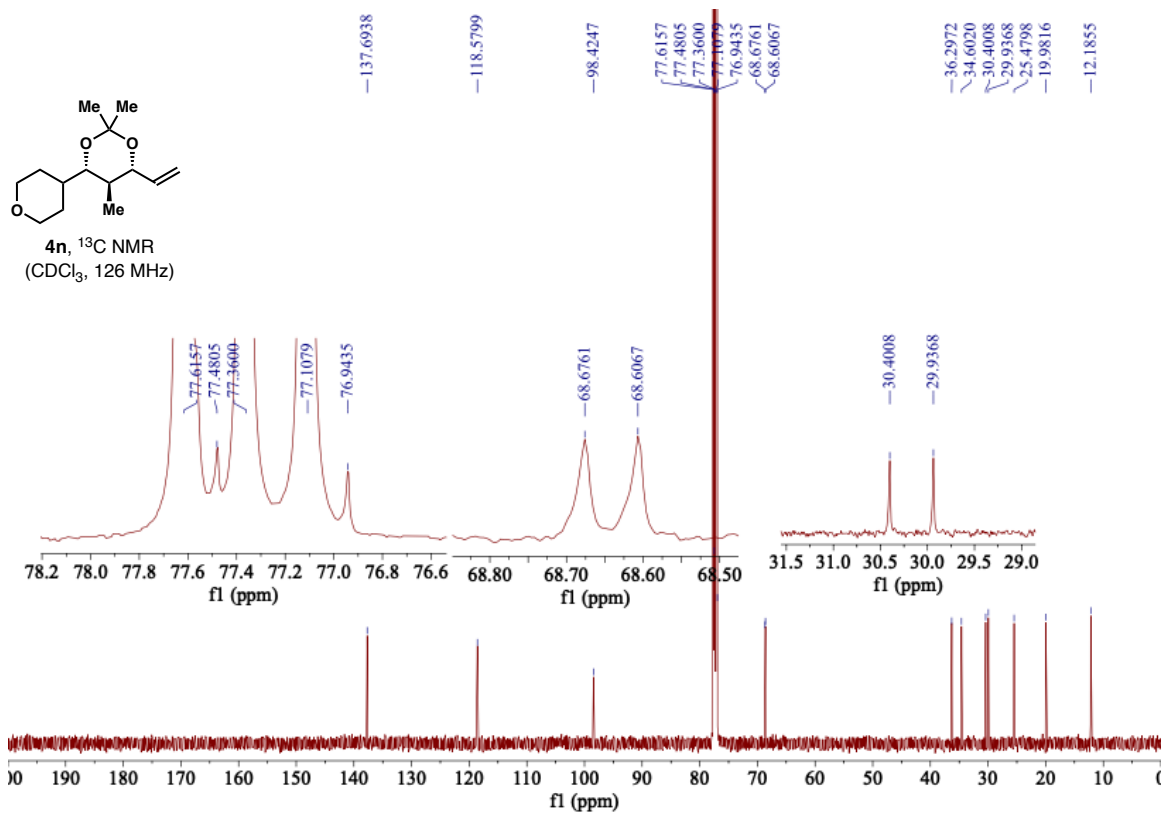



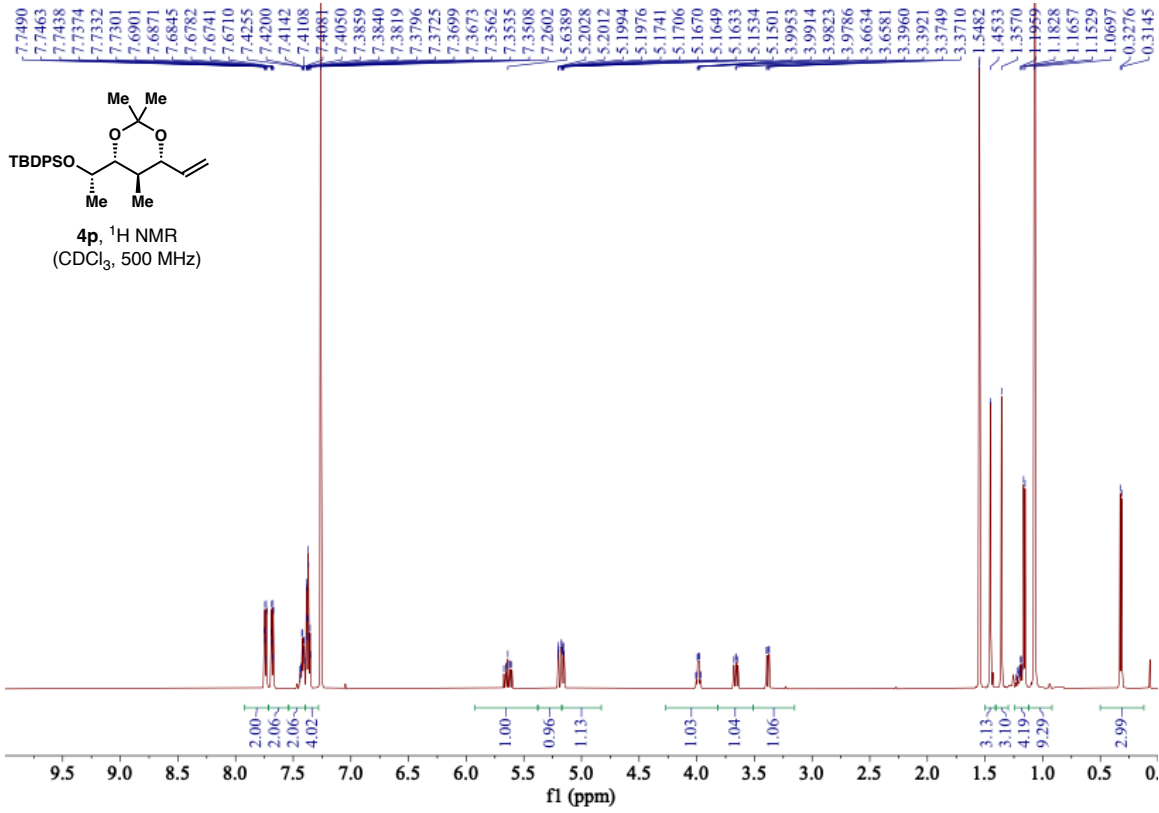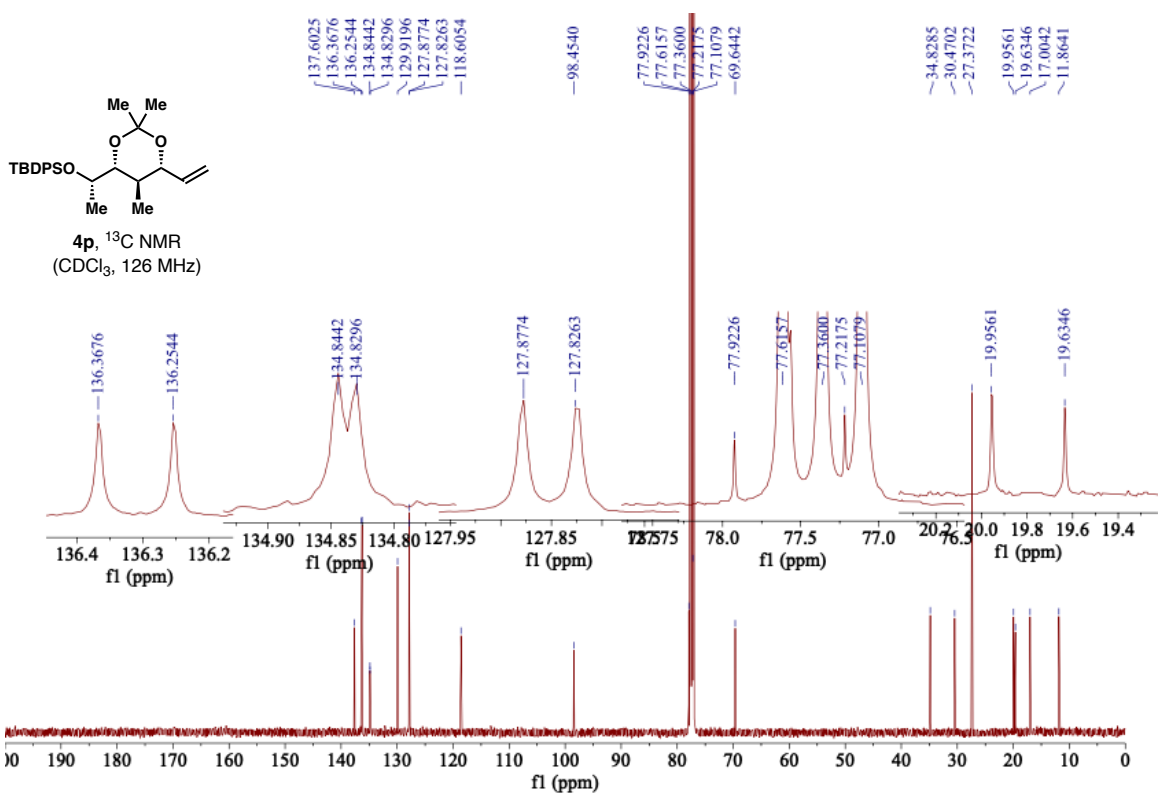



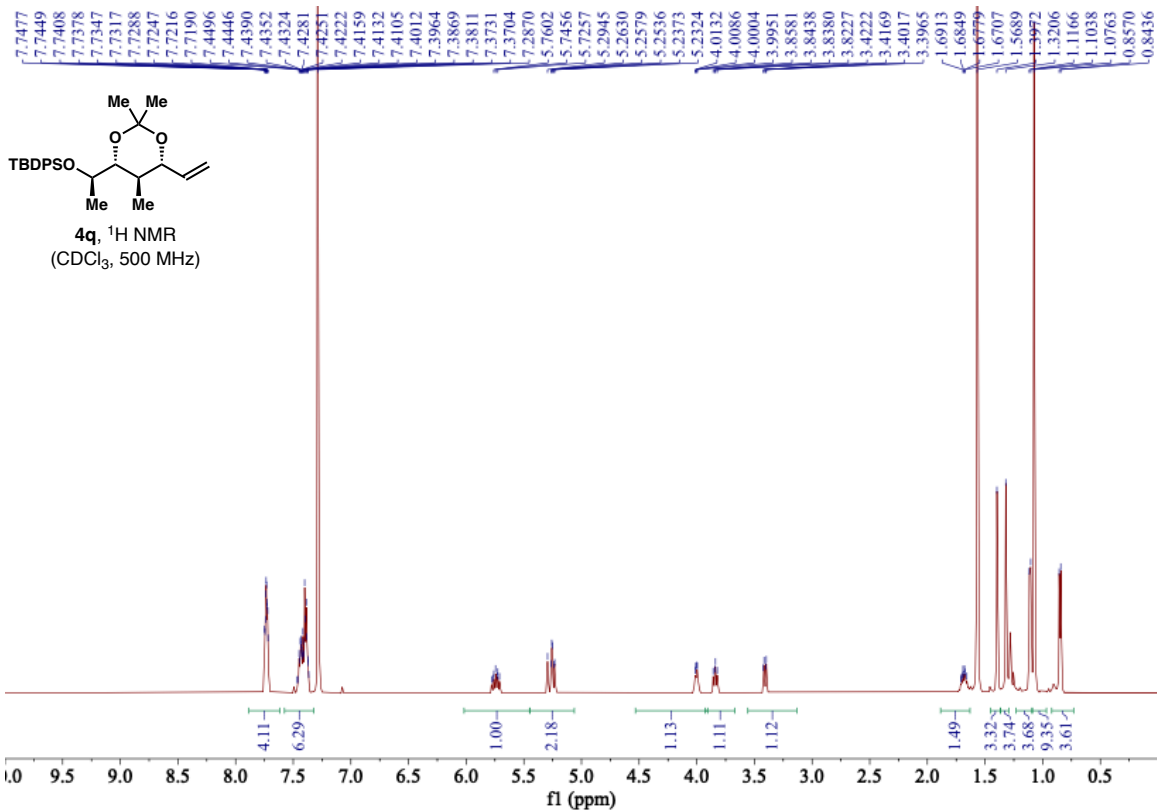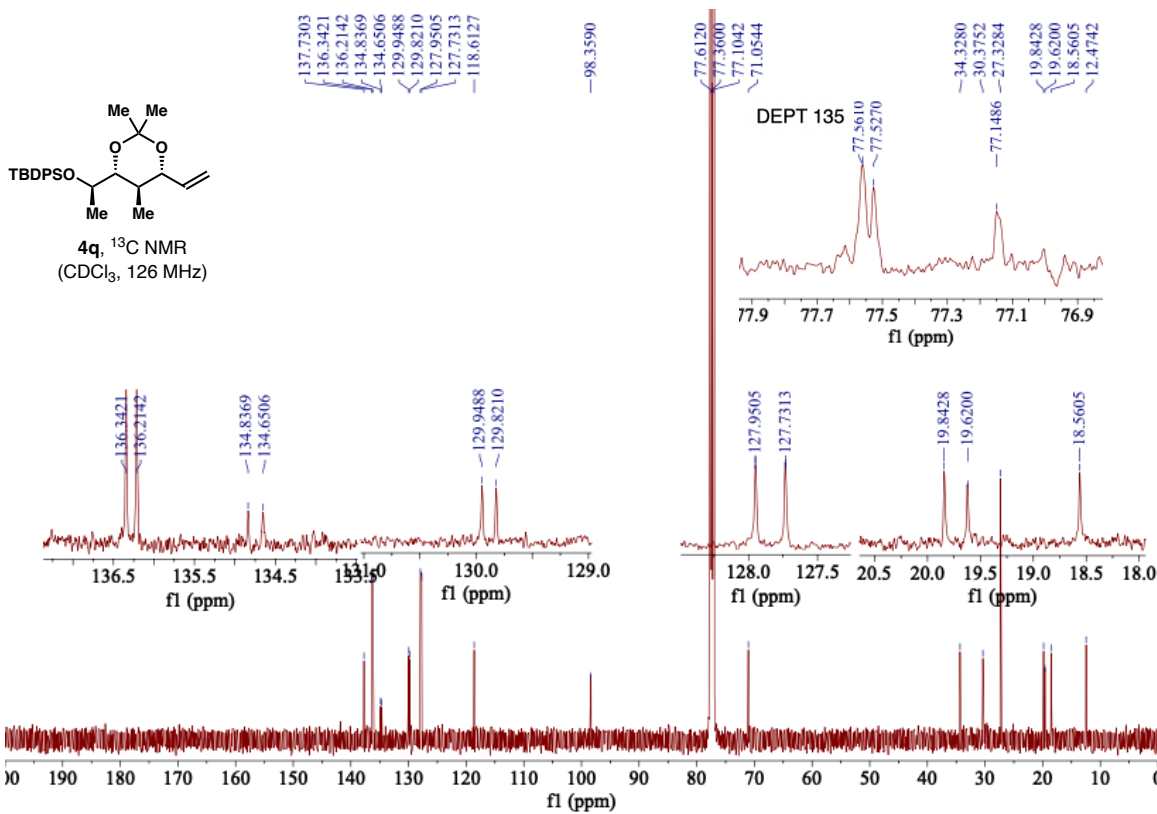

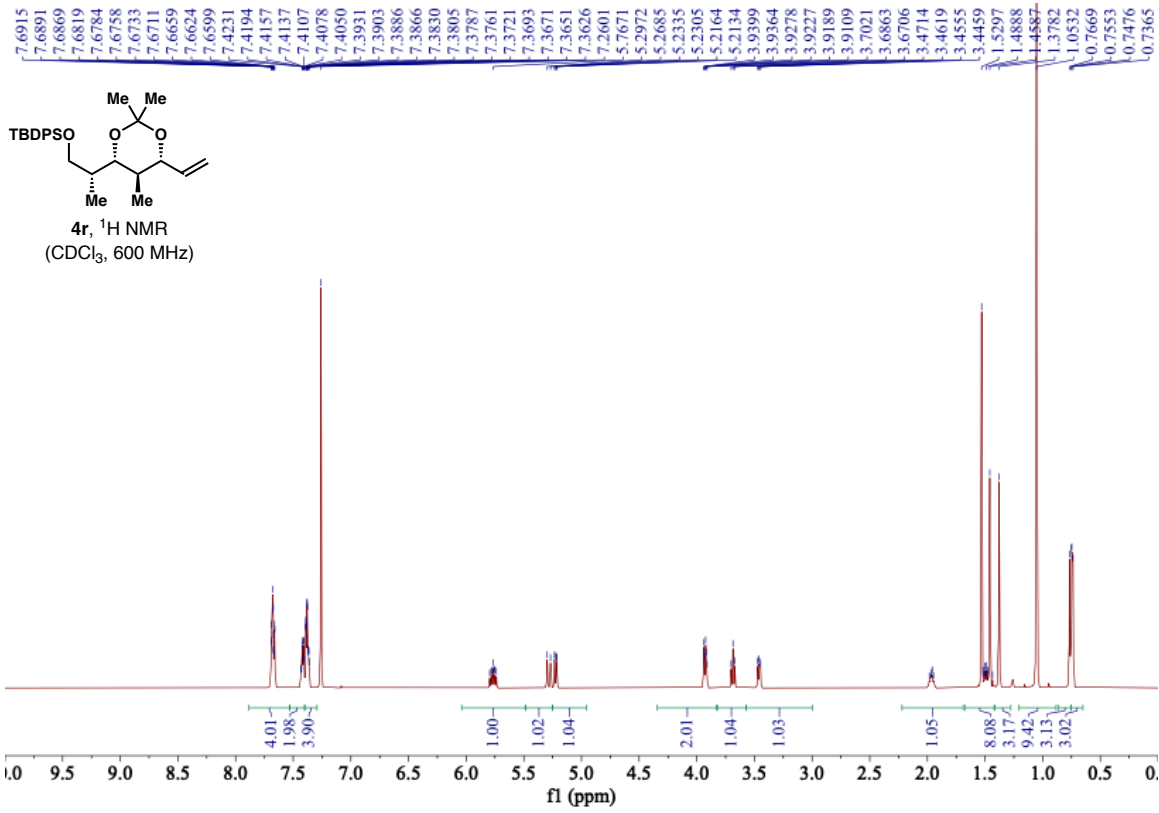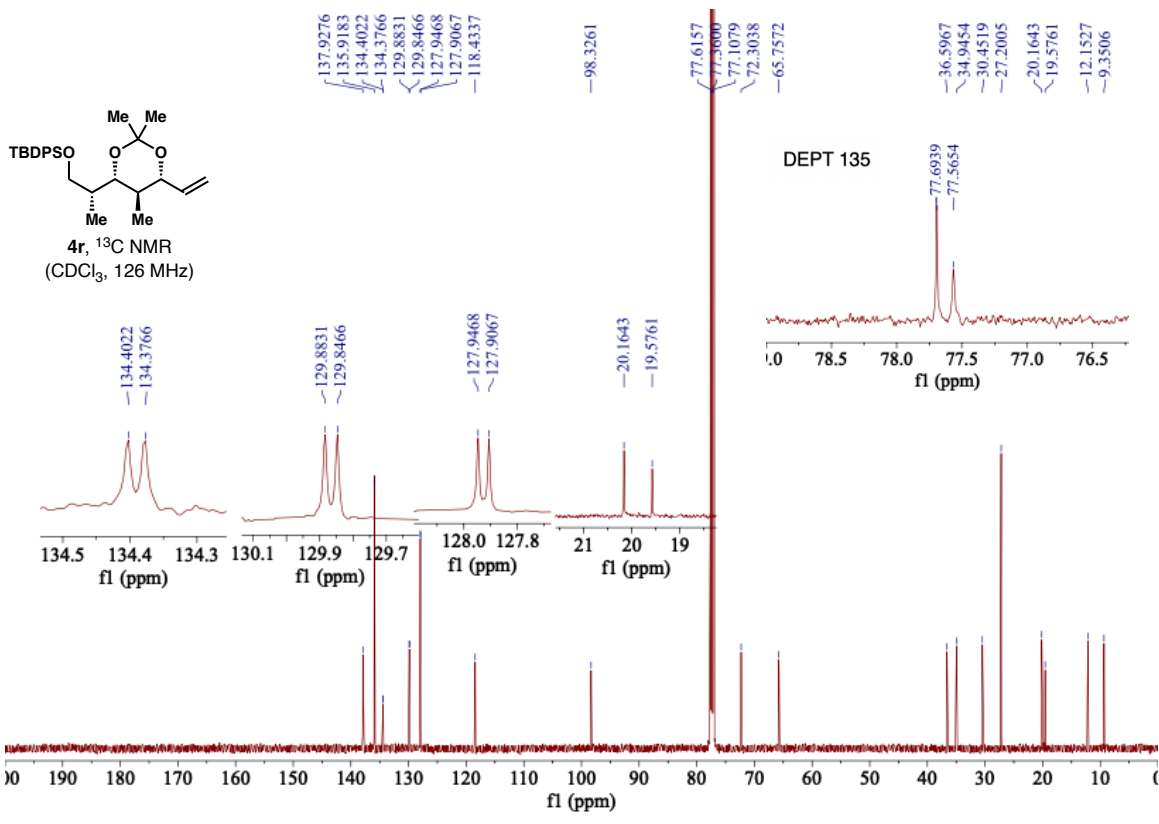

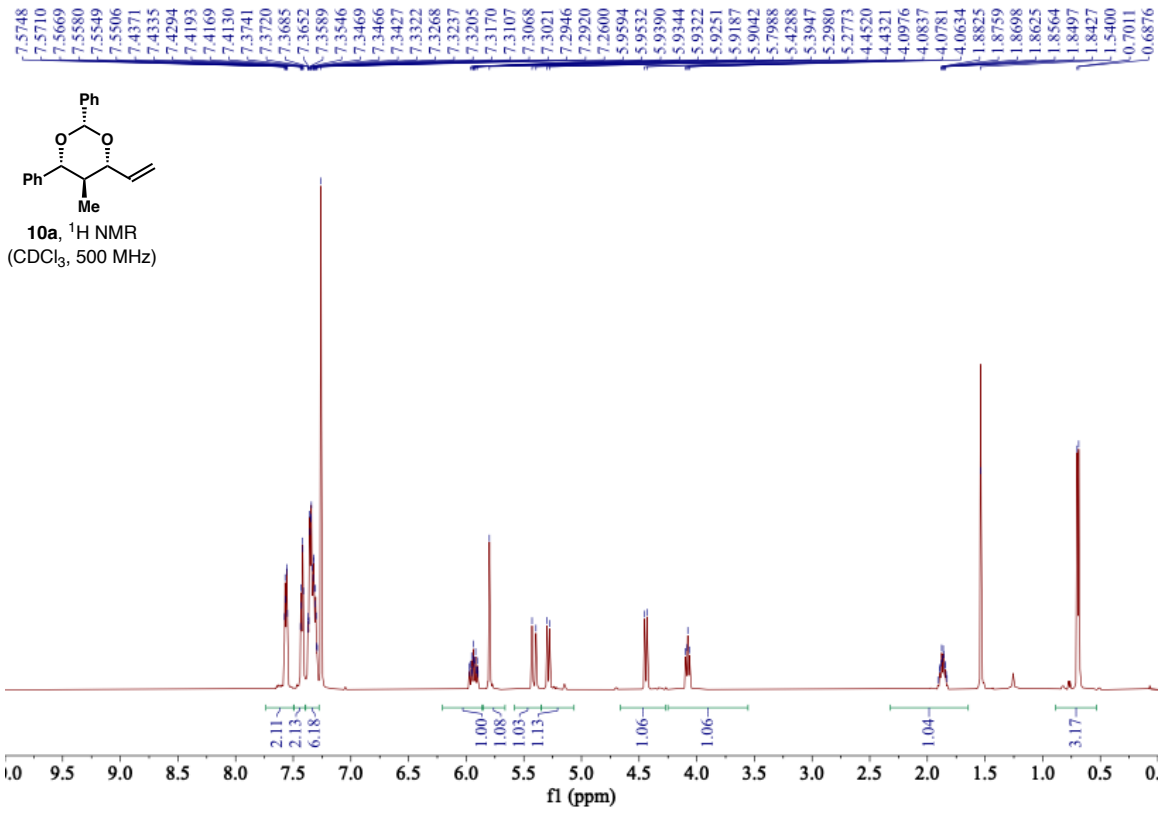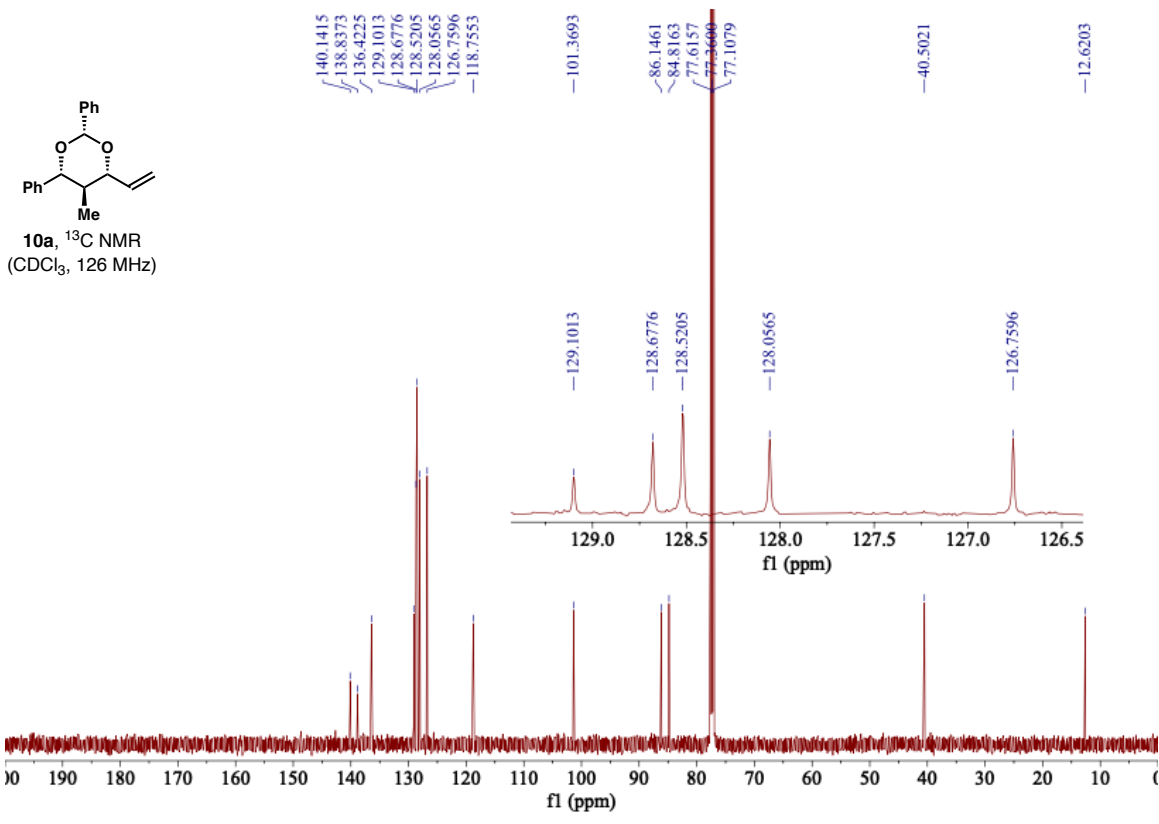

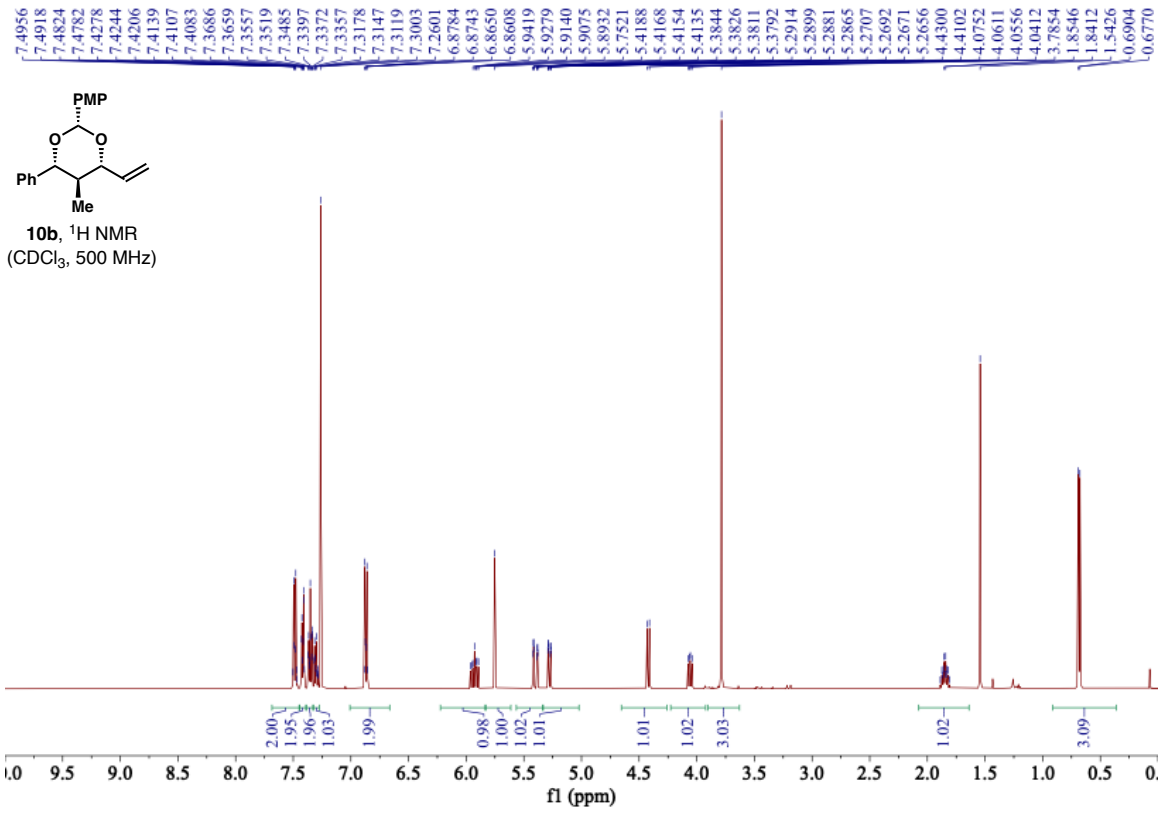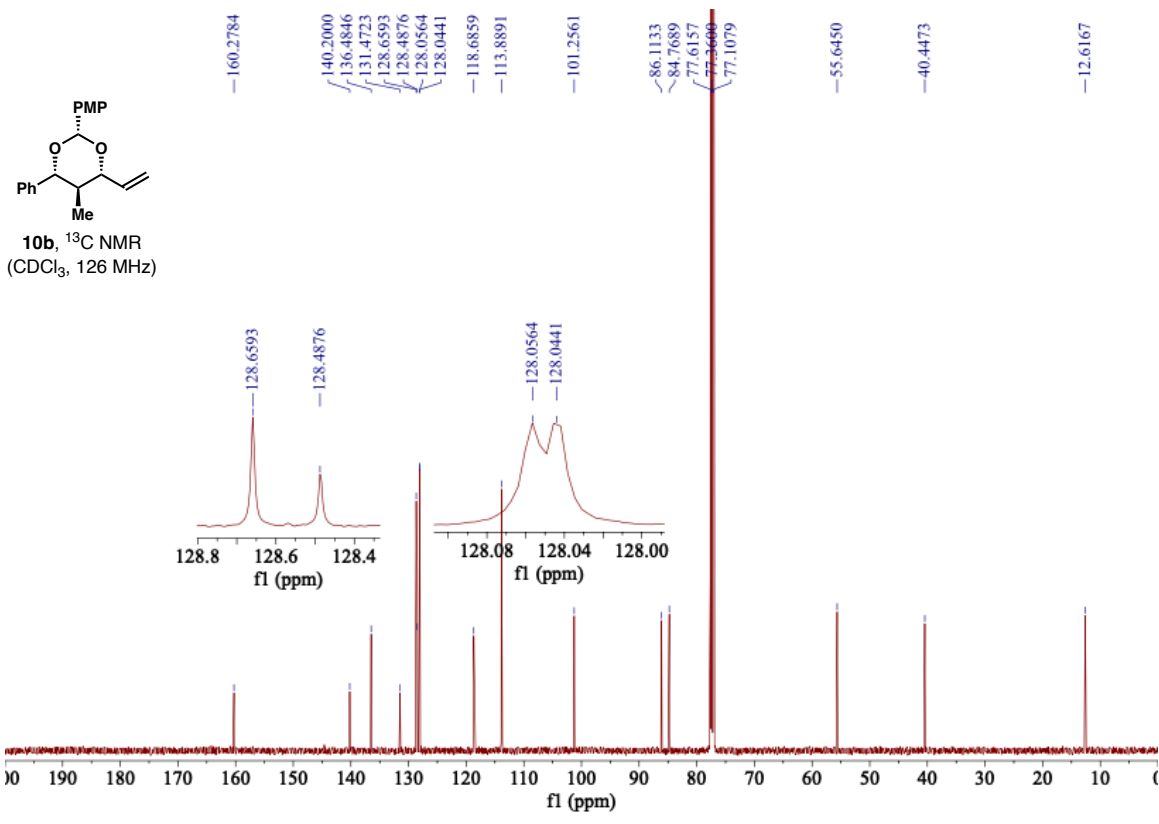

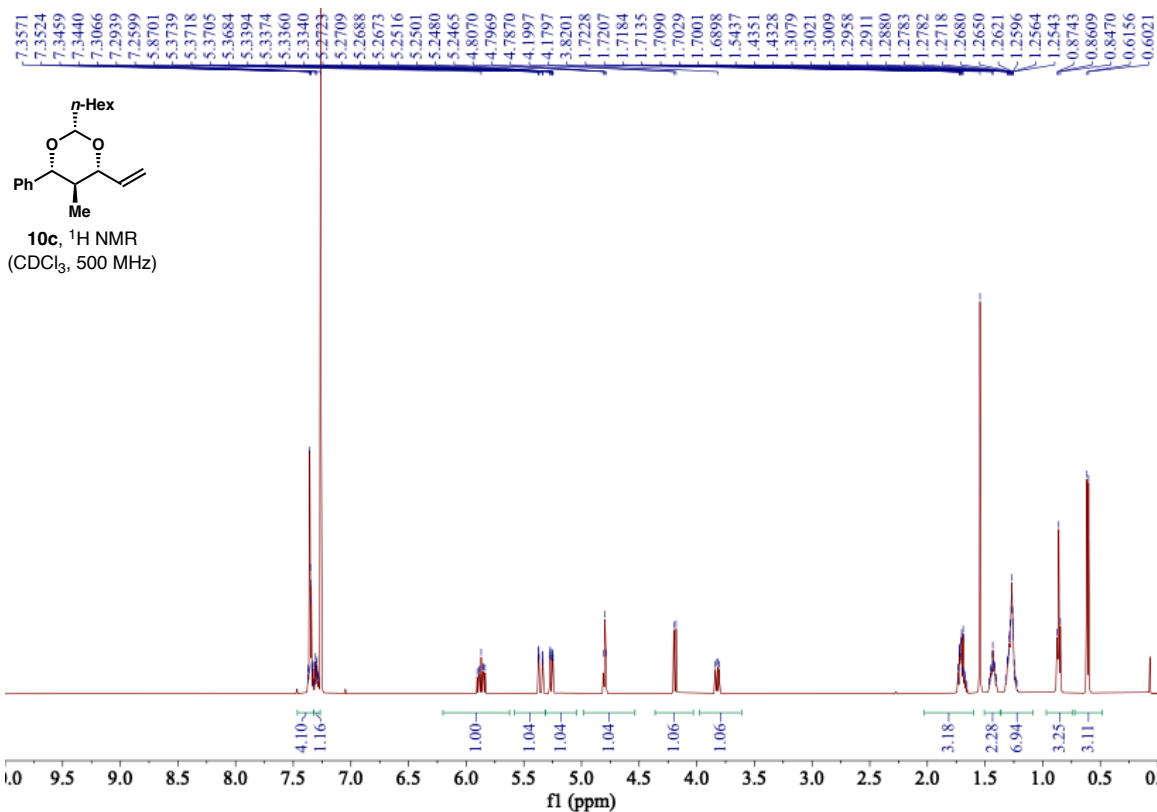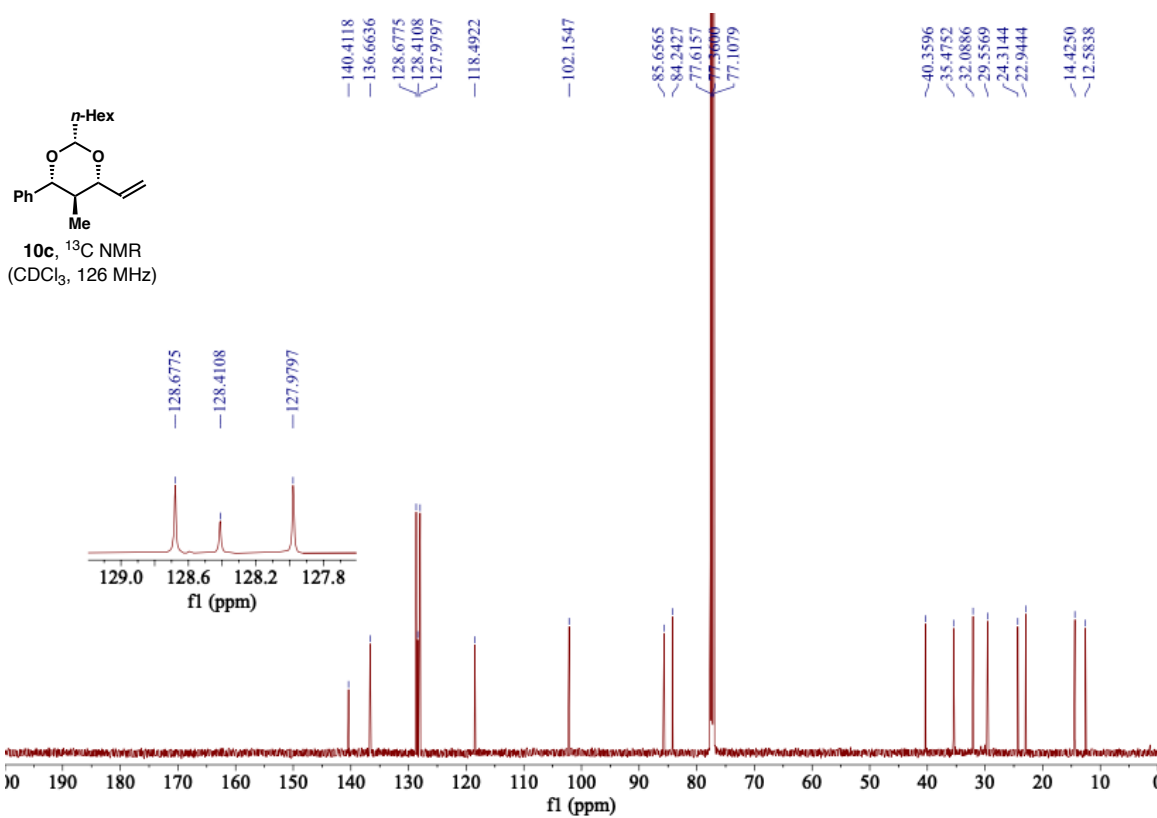

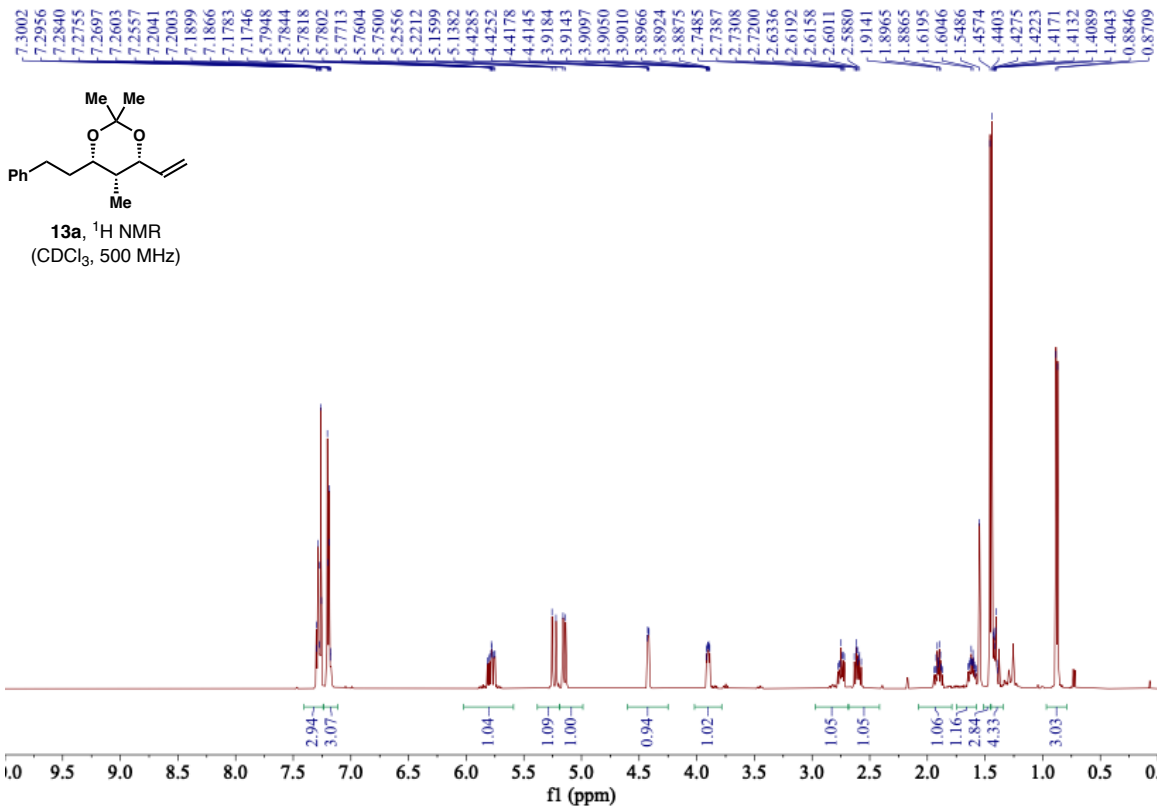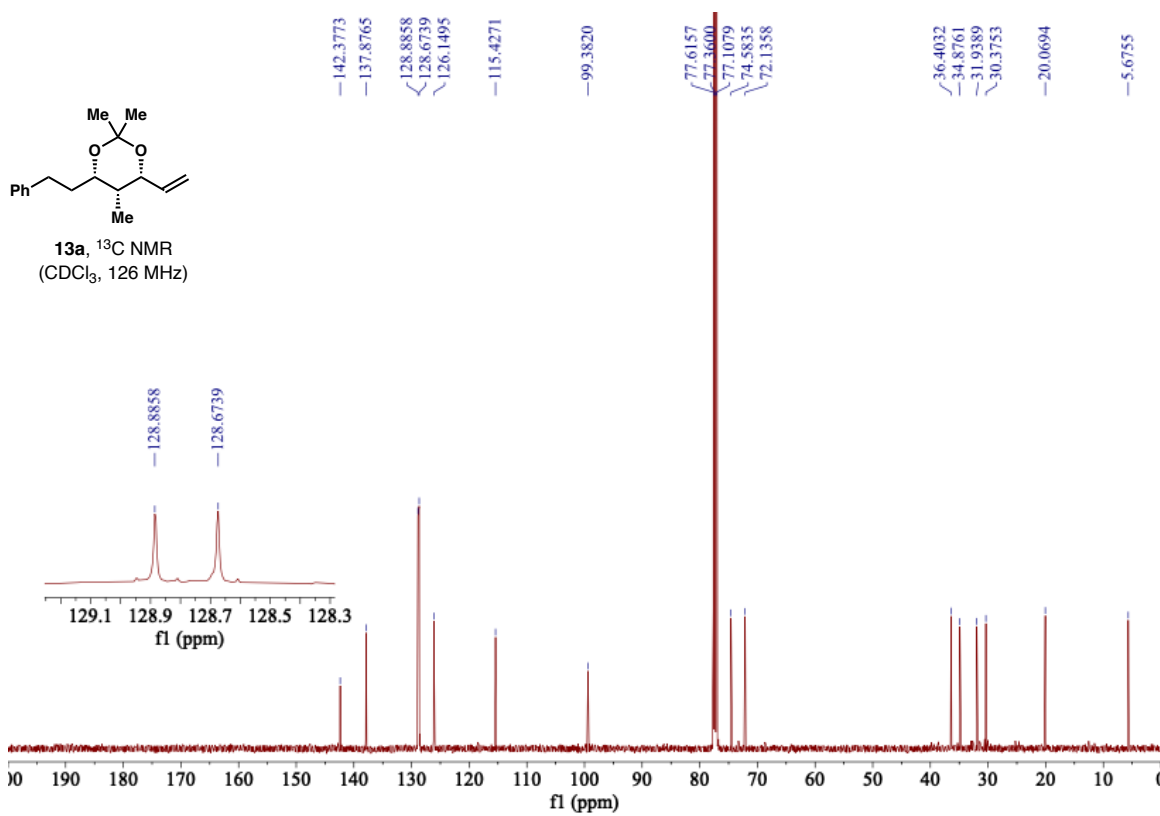

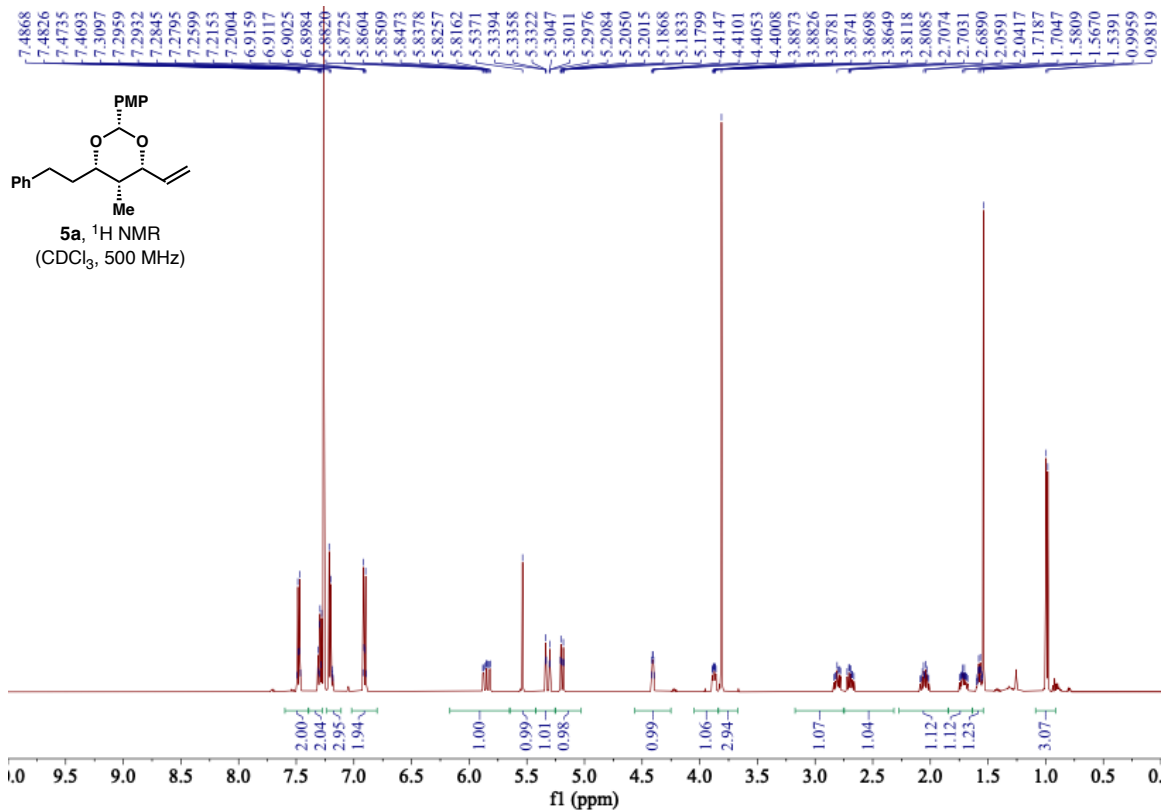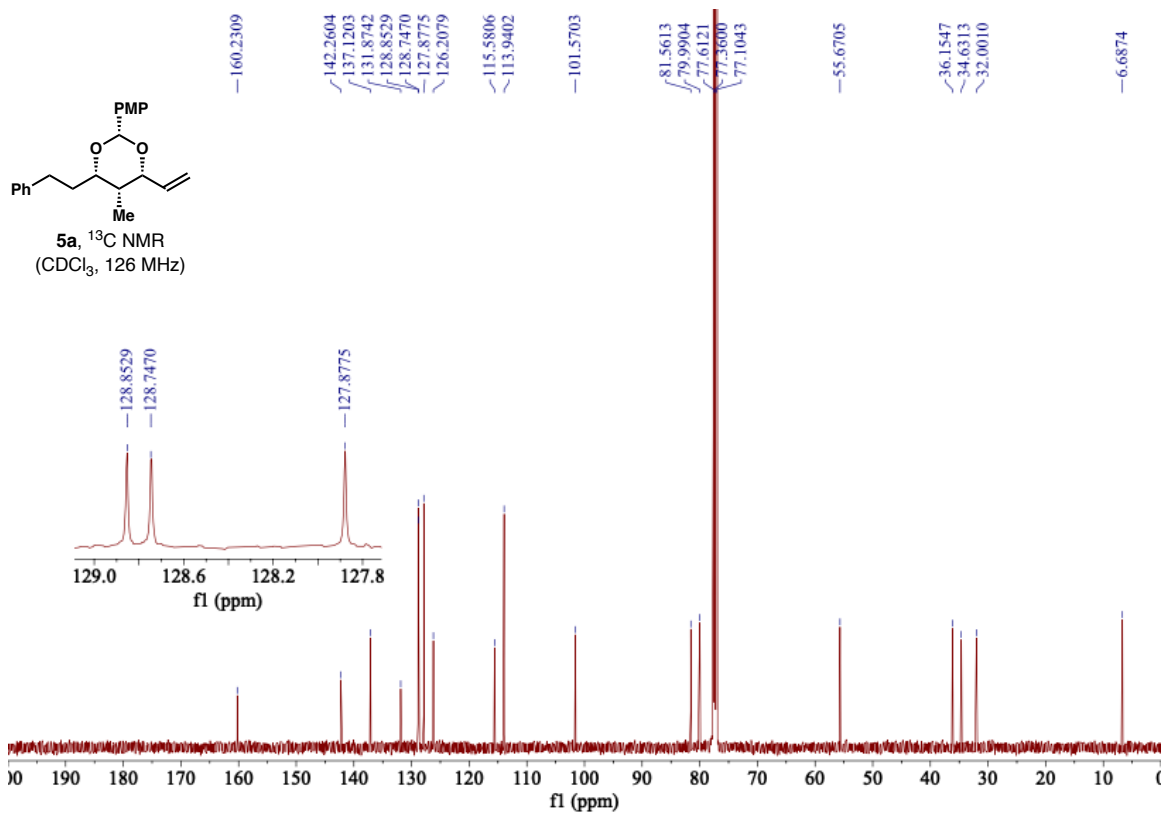

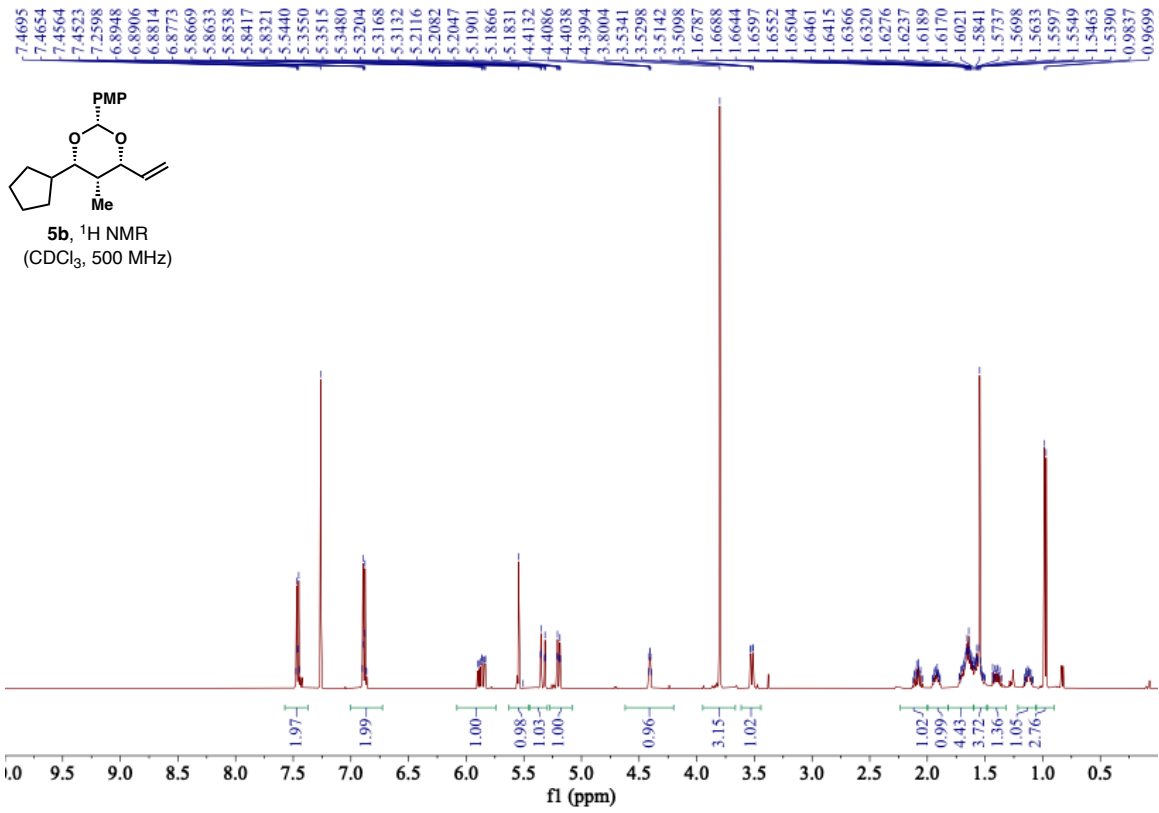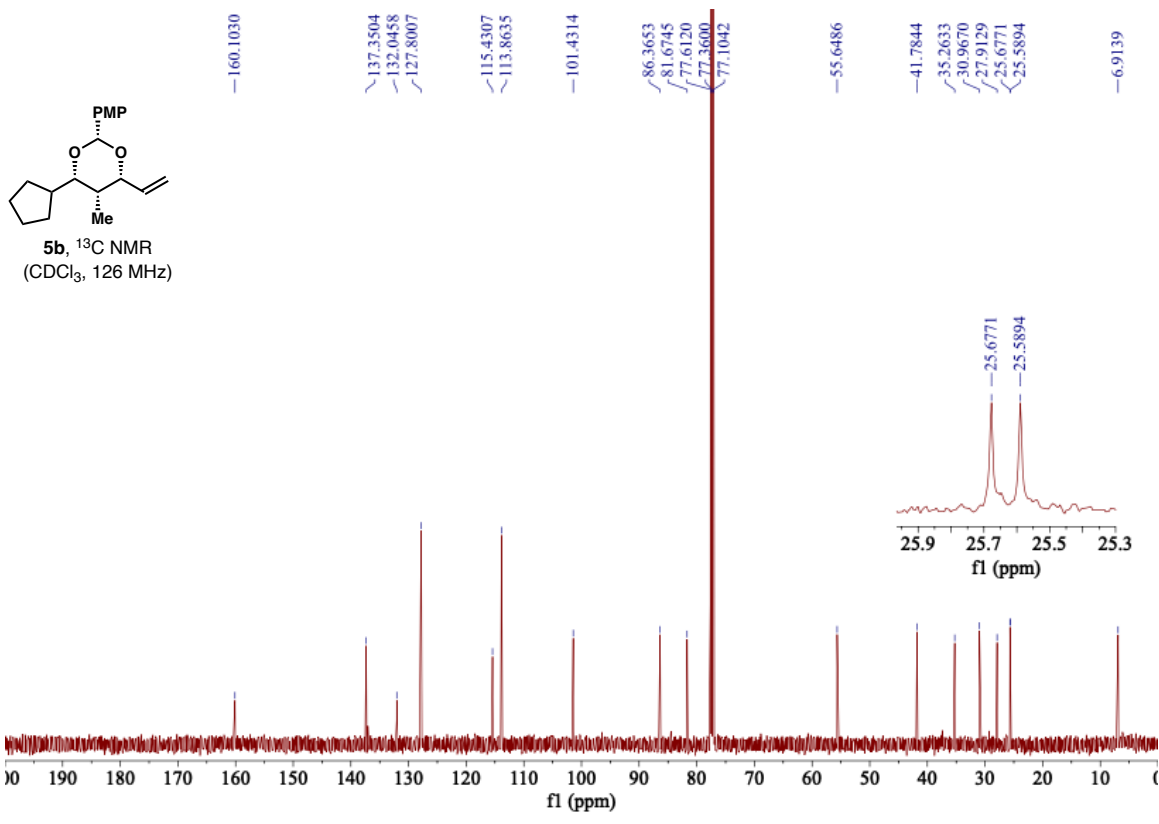



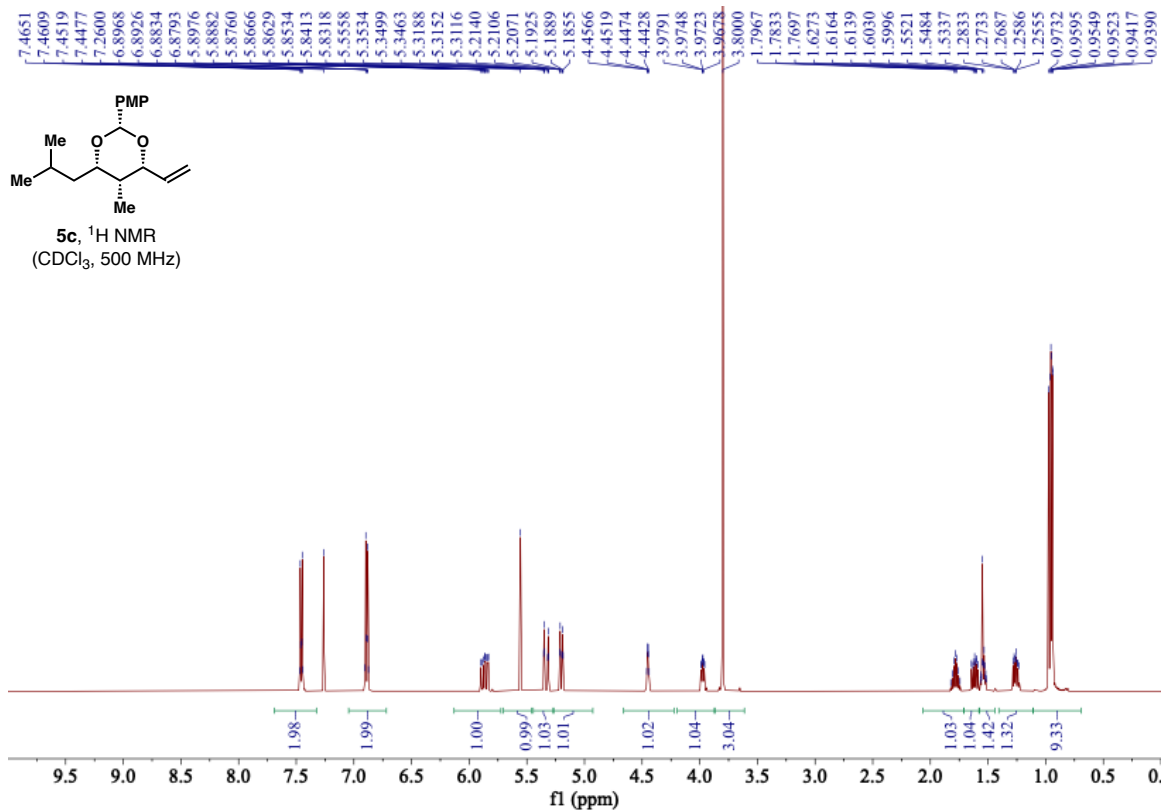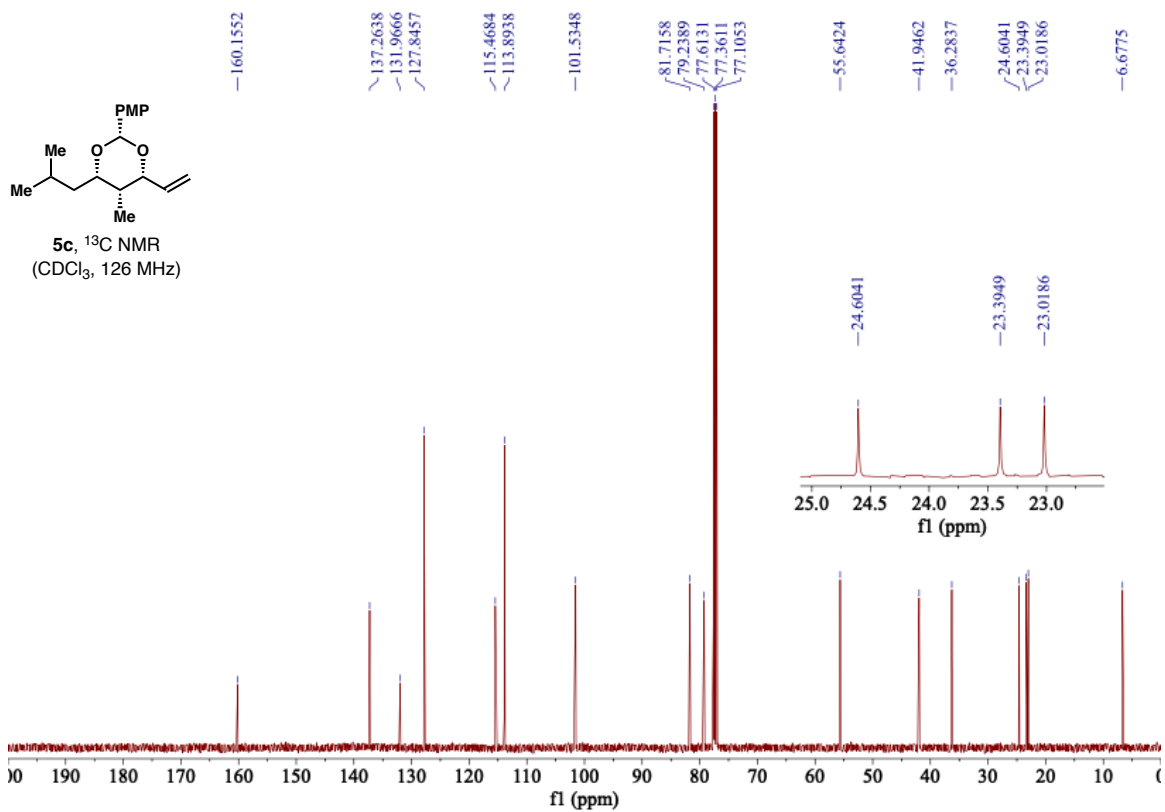

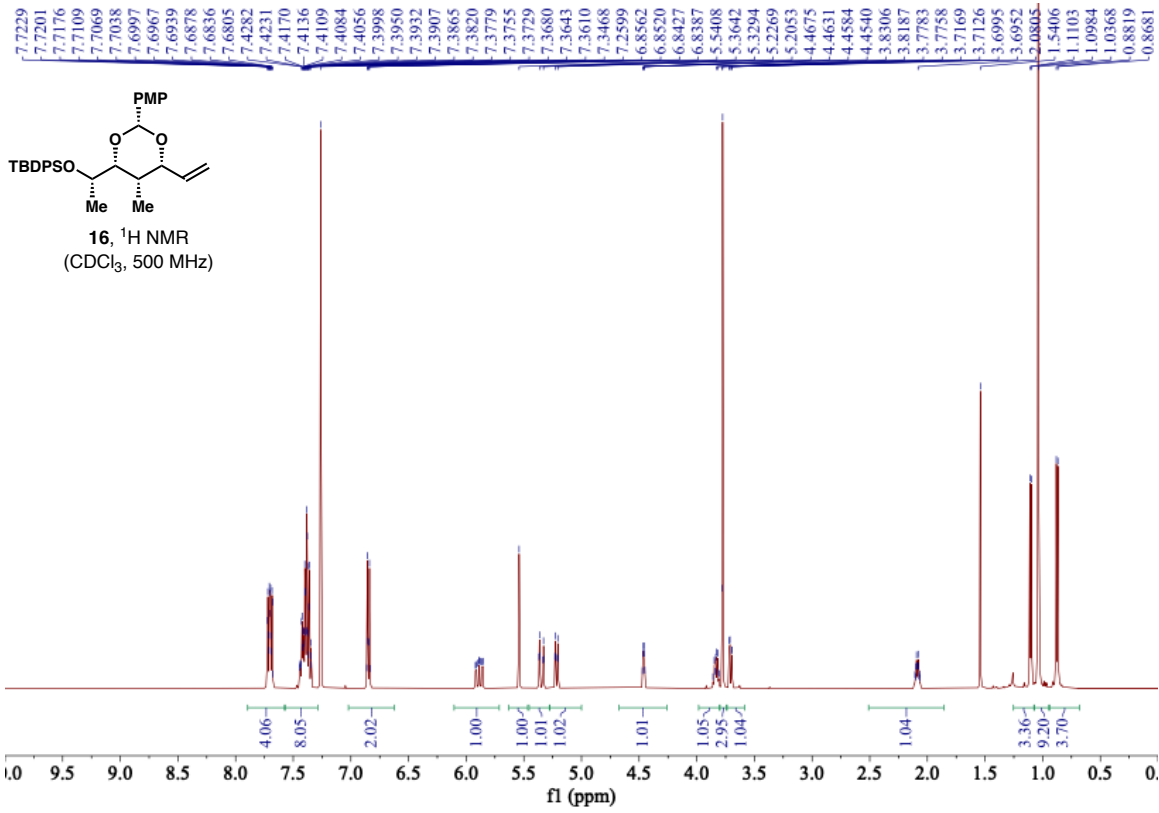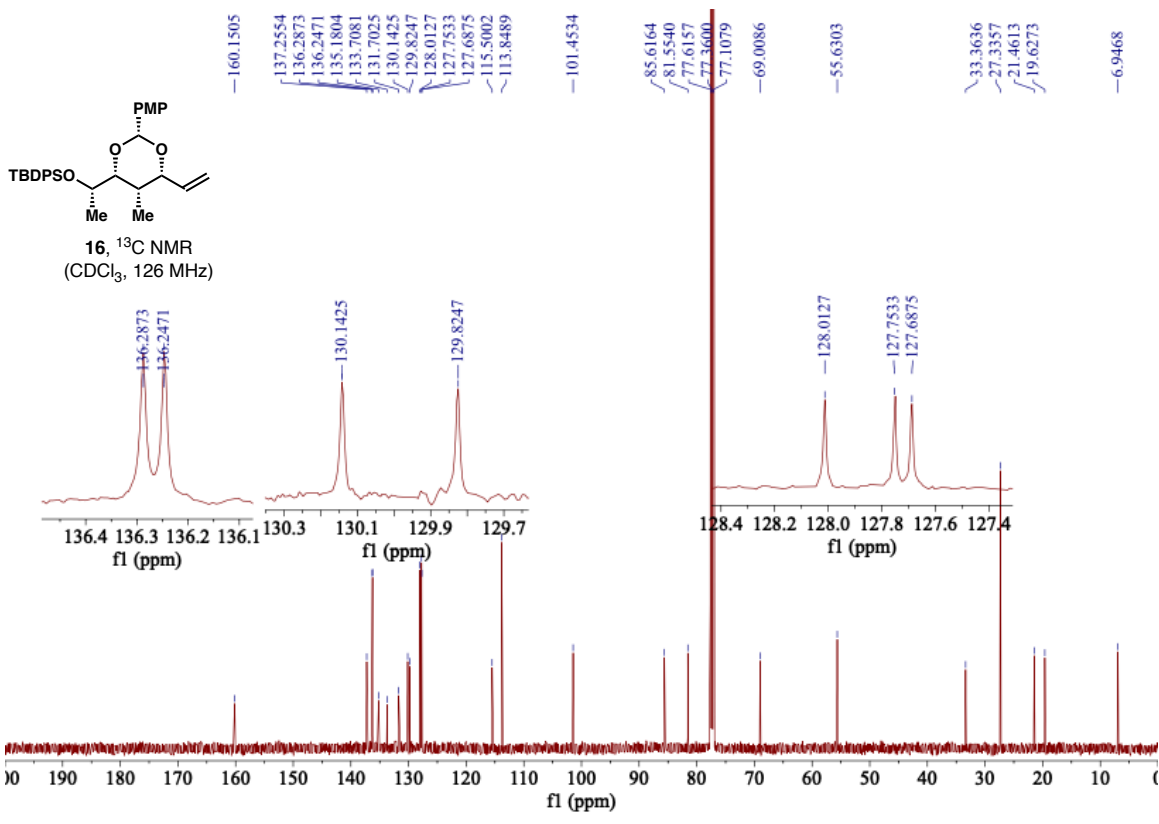

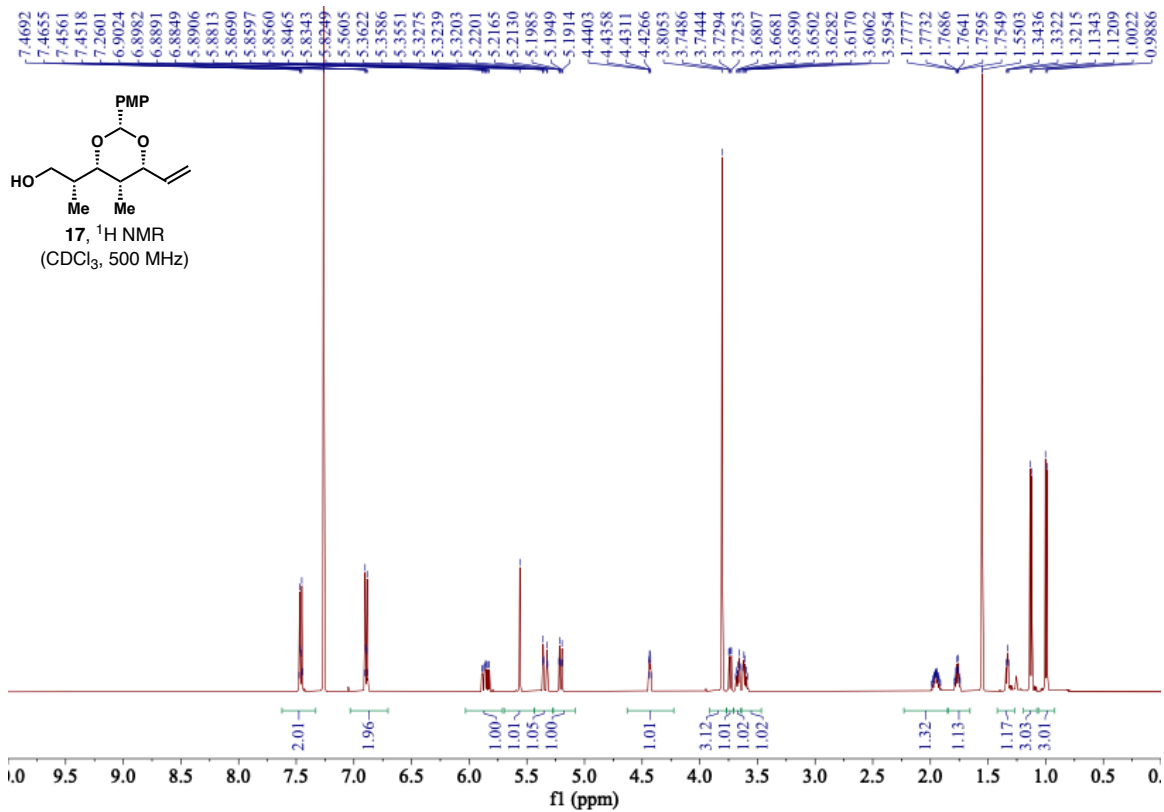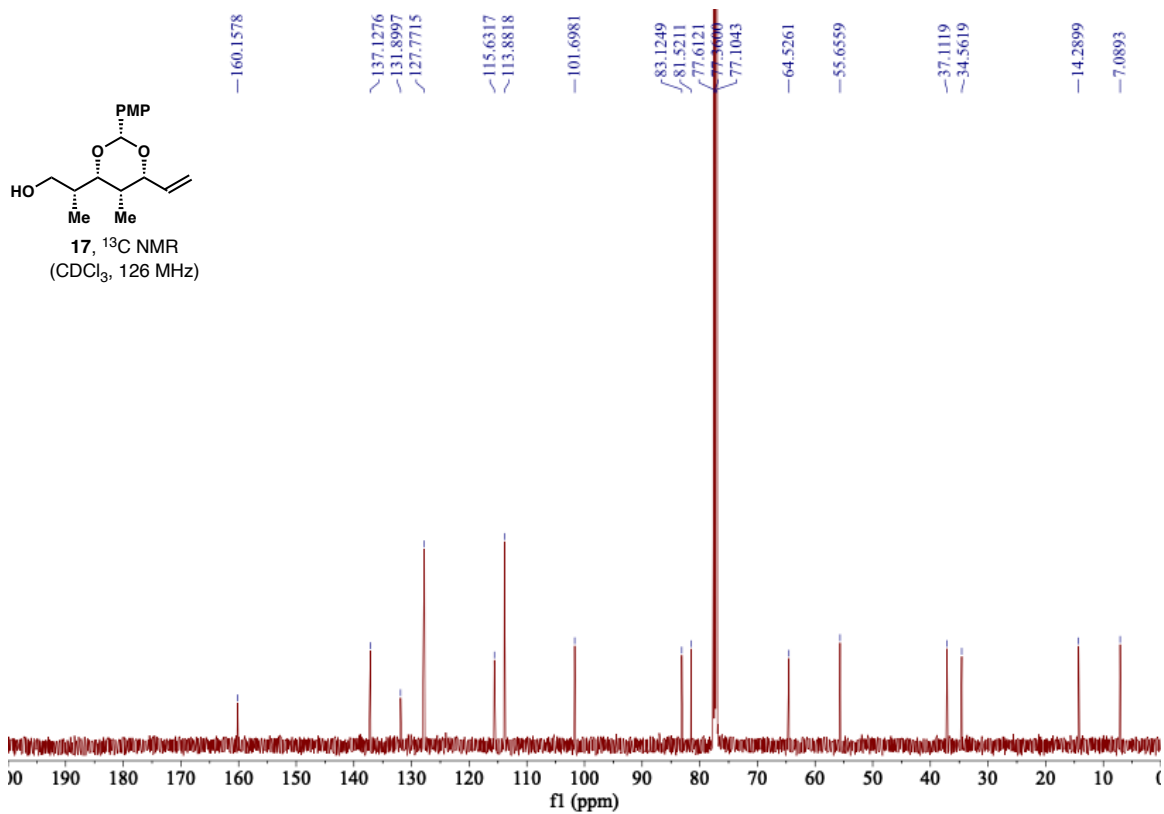

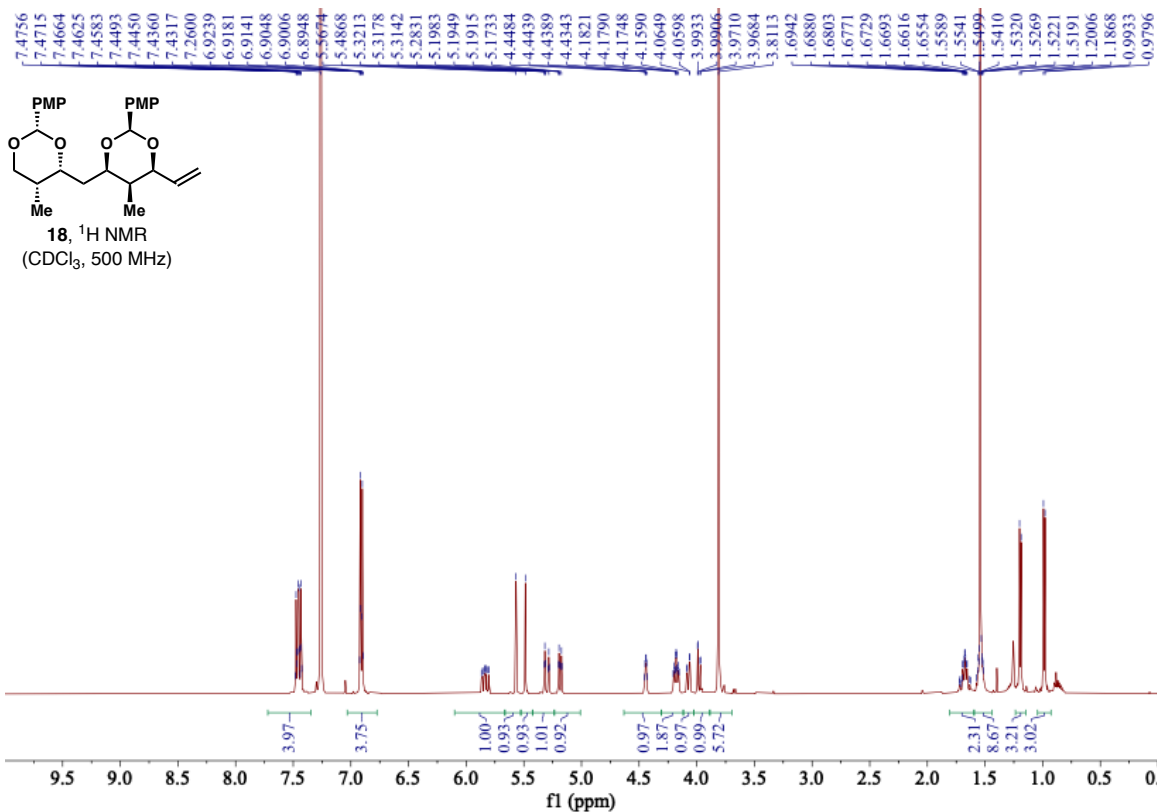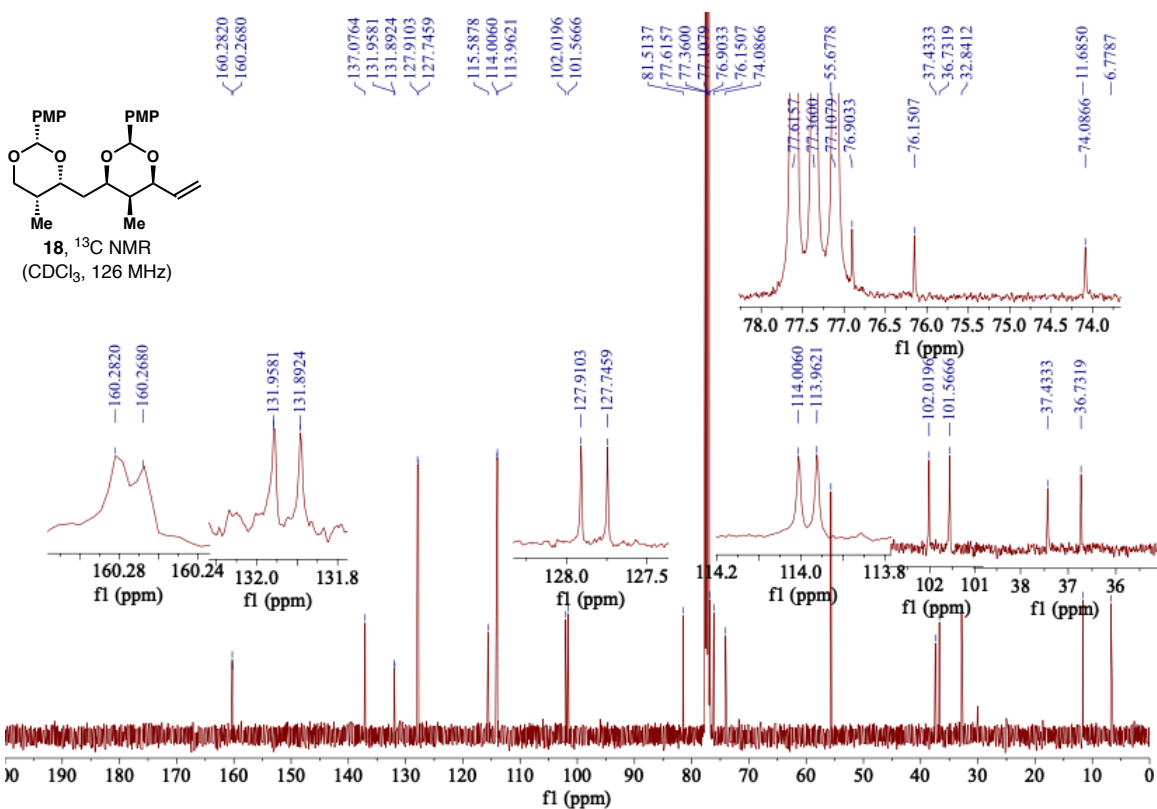

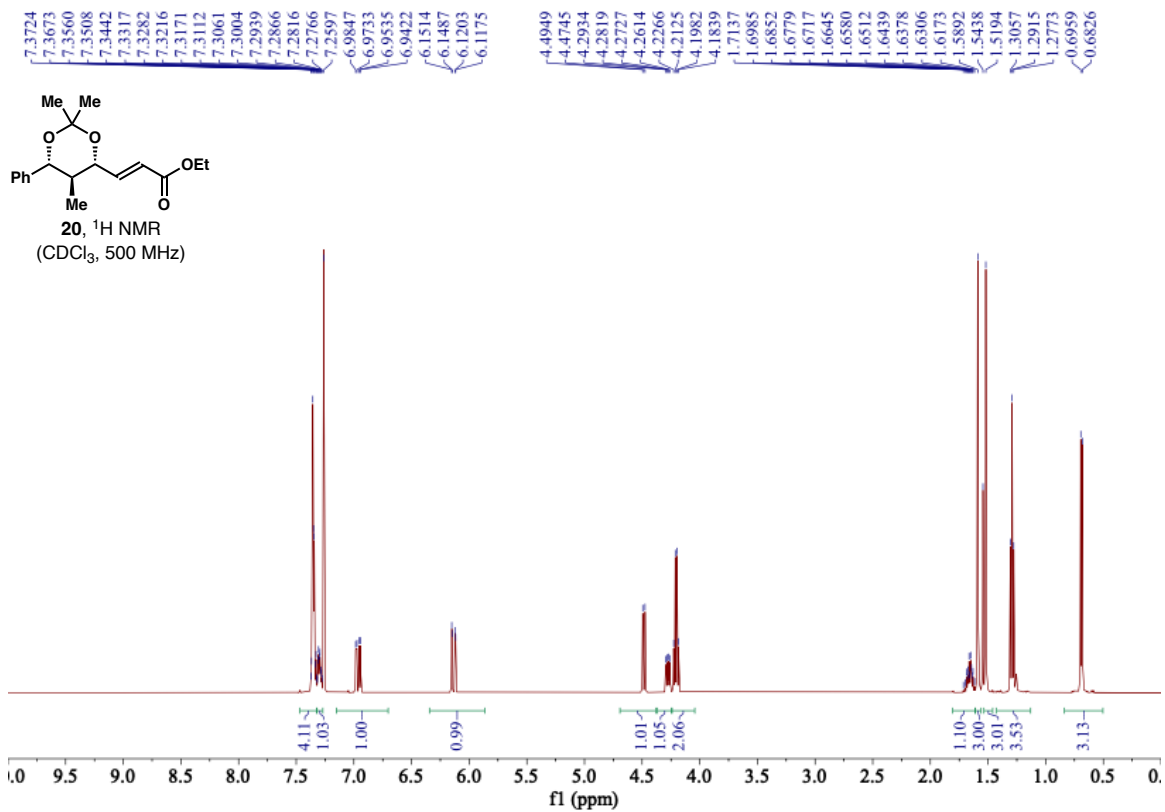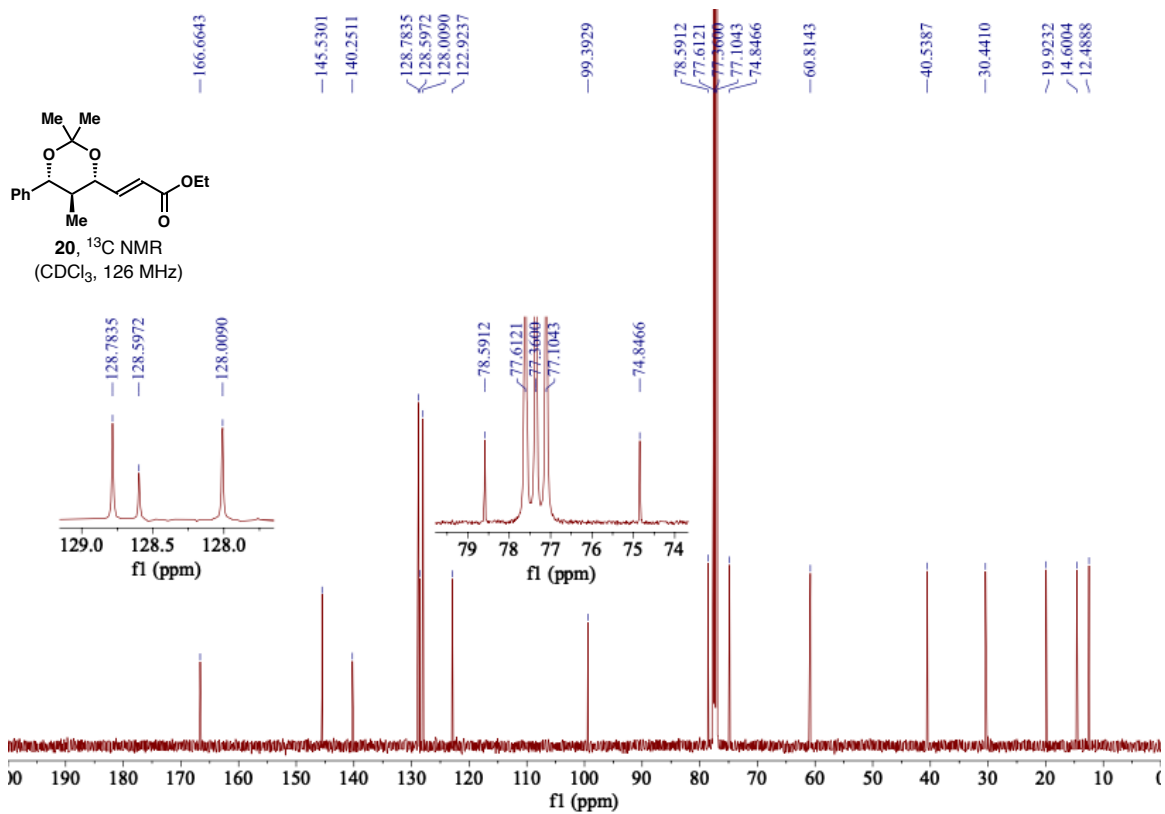

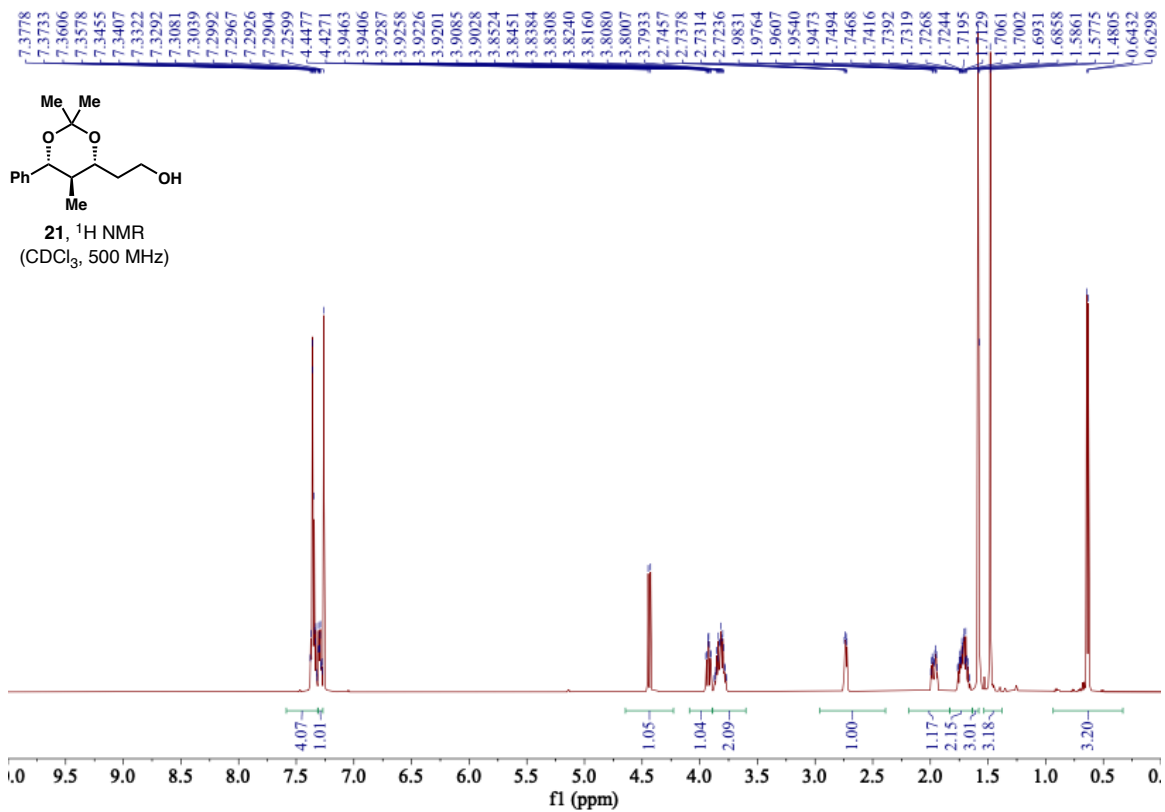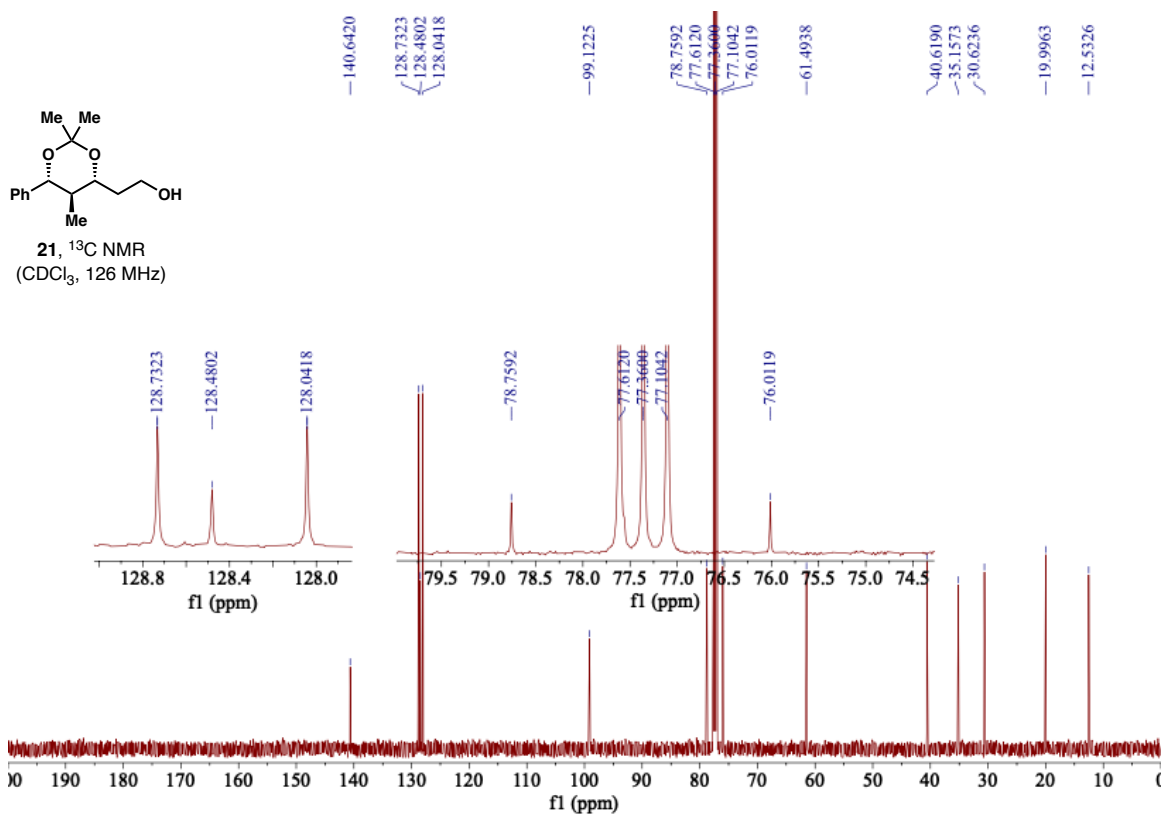

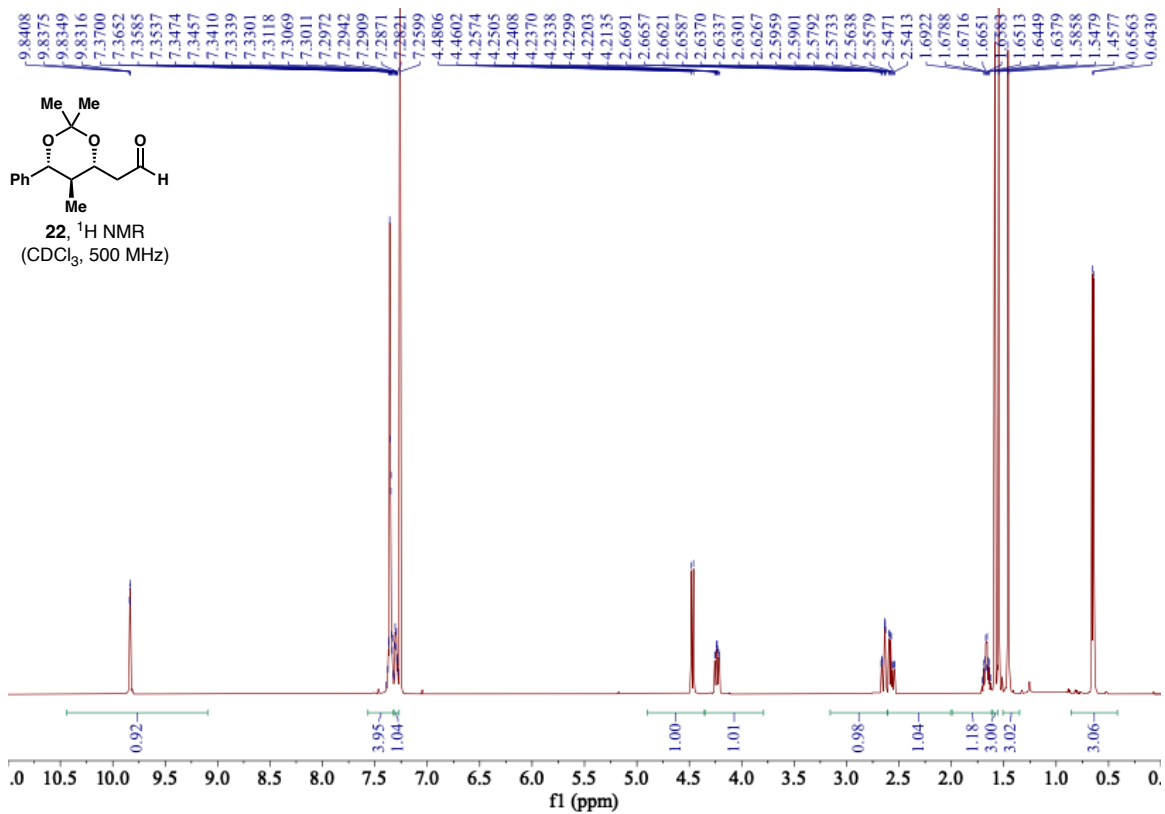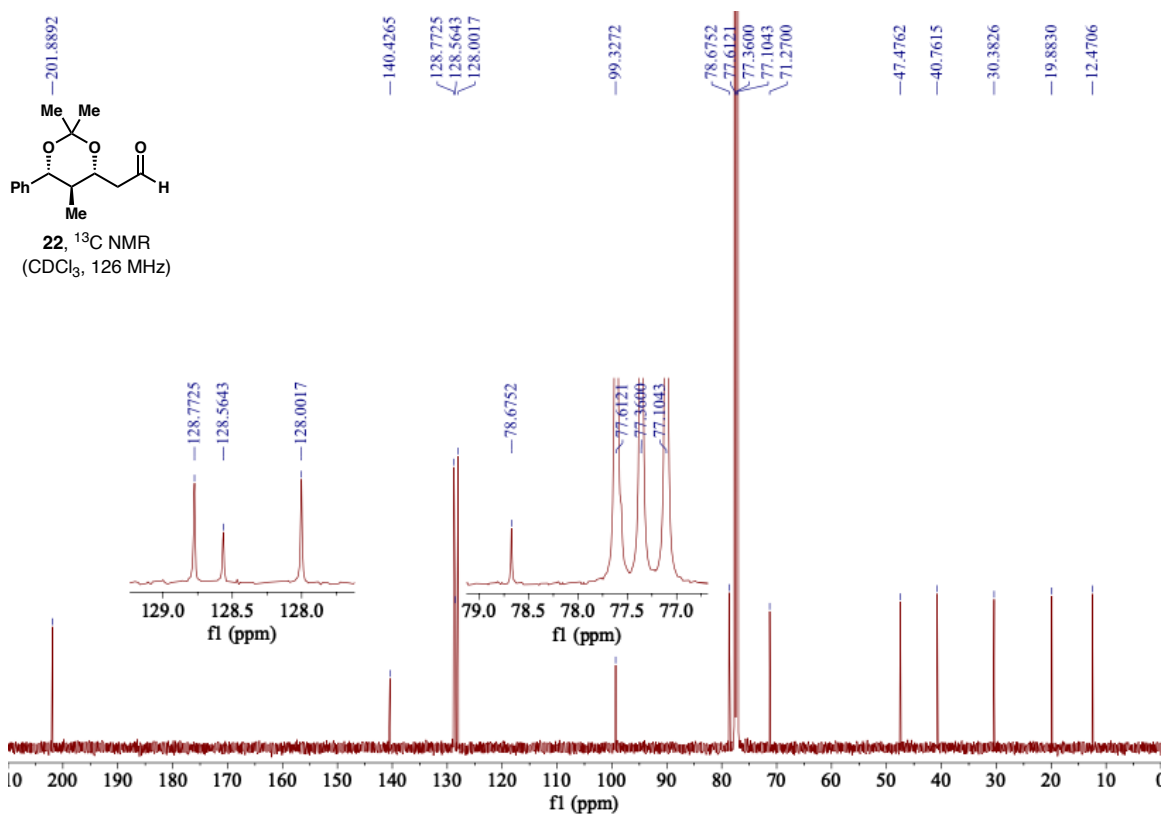

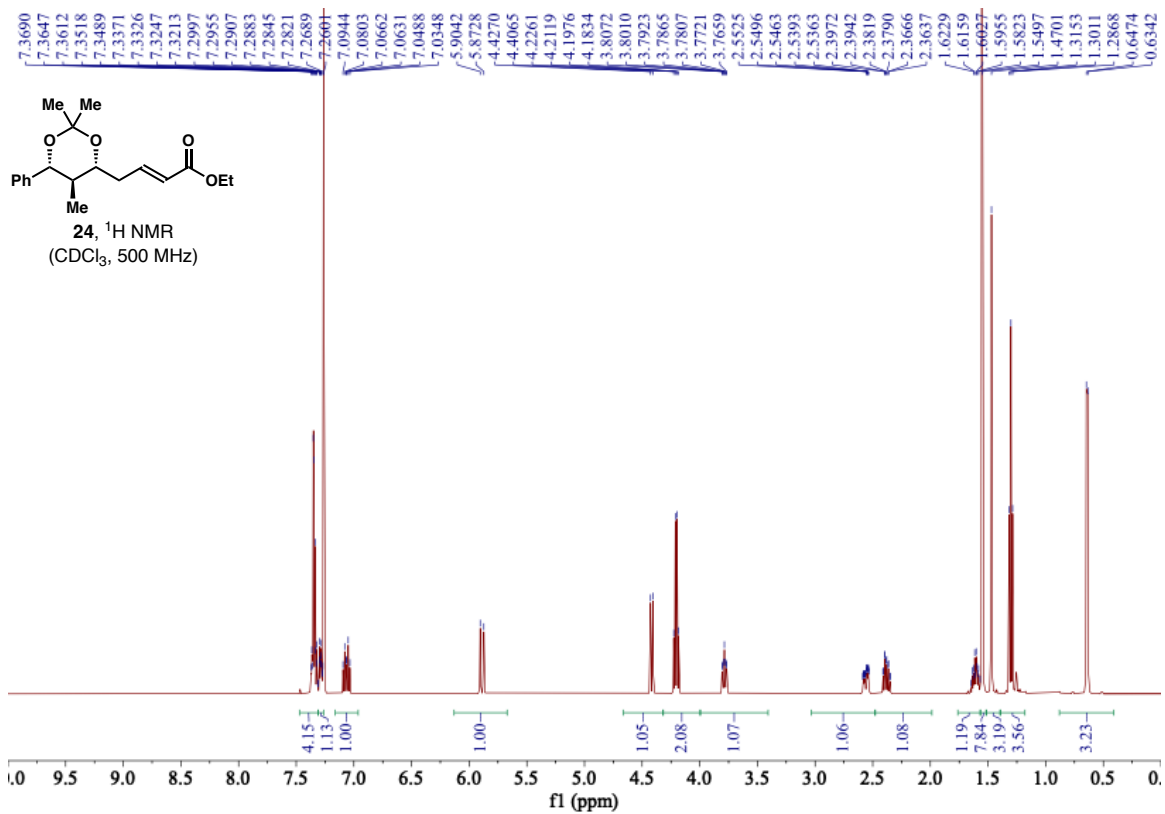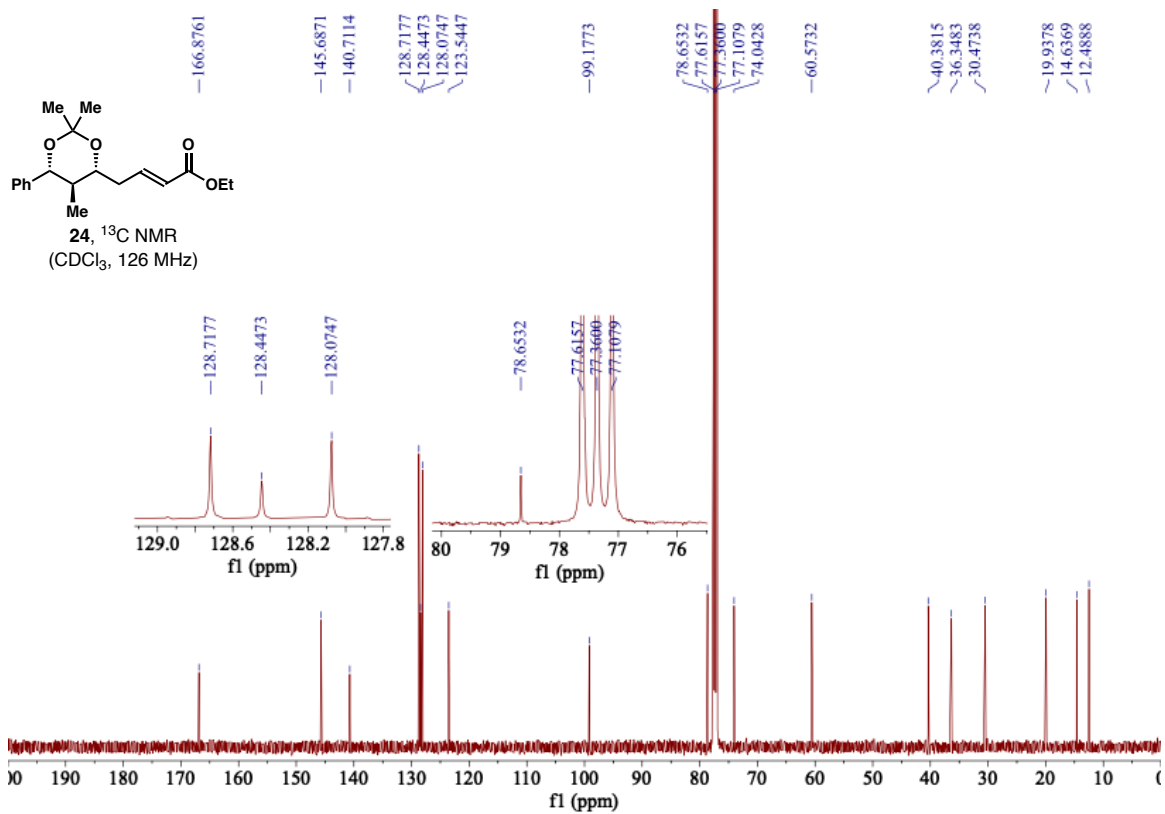

Supplement: d2sc07059f1.pdf [file d2sc07059f1.pdf]
